# Supplementary material for: MPV vs. Optical Platelet Volume Measurement: Which Is a Better Indicator for Neonatal Sepsis?
Source: Research Square preprint supplement (doi:10.21203/rs.3.rs-5332746/v1), 2024-12-16
Supplement: Supplementary file 1 [file 74a6c1f3499c74186ad3f756.xlsx]

## Sheet: Sheet1
检验日期	病人类别	病人姓名	性别	年龄	标本种类	备注	标本存储位置	复查状态	历史数据		AC	AC%	BASO	BASO%	CRP	EC	EOS	EOS%	HCT	HFR%	HGB	IRF	JP	LFR%	LYMPH	LYMPH%	MCH	MCHC	MCV	MFR%	MONO	MONO%	MPV	NC	NEUT	NEUT%	P-LCR	PCT	PDW	PLT	PLT-F	RBC	RDW-CV	RDW-SD	RET#	RET%	WBC	hs-CRP	samp.
20230423	住院	Patient	男	2天	静脉血	白细胞分类绝对值请按照校正白细胞计算。	000050^100^5^1			8.7									55.7		178				6.60	30.0	27.0	320.0	84.5		1.76	8.0	——		13.64	62.0	——	——	——	117	117	6.59	22.1	58.0			22.0	5.2
20230424	住院	Patient	男	19天	静脉血	已手工分类白细胞,红细胞、血小板形态未见异常.白细胞分类绝对值请按照校正白细胞计算。				17.4			0.41	2.0					44.3		148				2.65	13.0	33.0	334.0	98.9		3.67	18.0	-----		12.04	59.0	-----	-----	-----	121	121	4.48	19.6	69.2			20.4	6.2
20230424	住院	Patient	男	19天	静脉血	红细胞、白细胞、血小板形态未见异常。				ACCEPT			0.13	0.9			0.12	0.8	42.0		146				3.46	24.0	32.4	348.0	93.1		2.36	16.4	-----		8.34	57.9	-----	-----	-----	122	122	4.51	18.9	63.3			14.4	6.2
20230505	住院	Patient	女	27天	静脉血	红细胞、白细胞形态未见异常。镜下血小板难见。	000037^32^4^1			Reflex			0.01	0.1		0.63	6.8	31.8		102				0.78	8.5	32.8	321.0	102.3		0.11	1.2	-----		7.67	83.4	-----	-----	-----	19	19	3.11	16.3	61.5				9.2	78.8
20230506	住院	Patient	女	28天	静脉血	红细胞、白细胞、血小板形态未见异常。				UNACCEPT			0.01	0.2		0.27	6.5	23.8		86				1.03	25.1	32.7	361.0	90.5		0.10	2.4	——		2.70	65.8	——	——	——	13	13	2.63	15.8	52.0				4.1	135.8
20230509	住院	Patient	女	1月1天	静脉血	镜下血小板难见.				Reflex+Stain-Status Success			0.02	0.1		0.56	3.5	23.6		88				3.31	20.7	32.0	373.0	85.8		0.51	3.2	——		11.60	72.5	——	——	——	3		2.75	16.7	52.4				16.0	212.5
20230510	住院	Patient	女	1月2天	静脉血	镜下血小板难见。已手工分类白细胞,红细胞形态未见异常.	000341^53^3^1			100.00						0.37	3.0	19.6		71				3.08	25.0	32.4	362.0	89.5		1.23	10.0	——		7.38	60.0	——	——	——	3	3	2.19	17.5	56.7				12.3	169.9
20230511	住院	Patient	女	1月3天	静脉血	红细胞、白细胞、血小板形态未见异常。	000048^62^3^1			3R已完成+Stain-Status Success			0.03	0.2		0.58	4.6	26.9		93				3.94	31.3	31.1	346.0	90.0		1.70	13.5	——		6.35	50.4	——	——	——	21	21	2.99	14.8	48.1				12.6	80.6
20230512	住院	Patient	女	1月4天	静脉血	已手工分类白细胞,红细胞形态未见异常.镜下血小板难见。				1.0	0.36	2.0				1.26	7.0	25.2		84				4.14	23.0	30.2	333.0	90.6		1.08	6.0	——		9.72	54.0	——	——	——	14		2.78	14.7	49.1				18.0	51.8
20230517	住院	Patient	女	1月9天	静脉血	红细胞、白细胞、血小板形态未见异常。				UNACCEPT			0.02	0.1		0.19	0.9	29.5		98				6.85	31.7	29.4	332.0	88.6		1.40	6.5	——		13.13	60.8	——	——	——	85		3.33	15.6	50.0				21.6	12.4
20230522	住院	Patient	男	2天	静脉血	白细胞分类绝对值请按照校正白细胞计算。				100.00								43.5		136				10.65	50.0	28.3	313.0	90.6		0.43	2.0	——		9.80	46.0	——	——	——	20	20	4.80	26.3	78.5				21.3	56.7
20230523	住院	Patient	男	3天	末梢血	咽止し掷喟紫赴?红细胞、血小板形态未见异常.				5.4	0.27	1.0						44.9		142				9.28	34.0	27.7	316.0	87.7		3.55	13.0	——		13.38	49.0	——	——	——	56		5.12	26.5	77.2				27.3	92.2
20230524	住院	Patient	男	4天	静脉血	白细胞分类绝对值请按照校正白细胞计算。				12.4						0.22	1.0	51.2		164				8.21	38.0	27.7	320.0	86.6		0.22	1.0	——		12.53	58.0	——	——	——	38	38	5.91	26.5	76.2				21.6	80.5
20230524	住院	Patient	女	3月	静脉血	红细胞、白细胞、血小板形态未见异常。				Smear-Status Success			0.01	0.2		0.04	0.7	22.9		78				1.60	30.8	31.2	341.0	91.6		0.73	14.0	——		2.82	54.3	——	——	——	112	112	2.50	17.5	58.0				5.2	138.1
20230525	住院	Patient	男	5天	静脉血	白细胞分类绝对值请按照校正白细胞计算。	000028^49^6^1			100.00						1.38	12.0	50.7		153				2.53	22.0	26.6	302.0	88.2		0.23	2.0	——		7.13	62.0	——	——	——	21	21	5.75	27.2	81.4				11.5	40.2
20230526	住院	Patient	男	13天	静脉血	红细胞、白细胞形态未见异常,光学计数血小板。	000016^85^4^1			ACCEPT			0.03	0.2		0.31	1.8	28.6		100				6.28	36.5	32.4	350.0	92.6		2.24	13.0	——		8.34	48.5	——	——	——	126	126	3.09	18.0	59.8				17.2	10.5
20230527	住院	Patient	男	14天	静脉血	红细胞、白细胞、血小板形态未见异常。							0.05	0.2		0.41	1.8	30.3		110				7.98	34.7	32.4	363.0	89.4		3.06	13.3	-----		11.50	50.0	-----	-----	-----	125	125	3.39	17.9	56.8				23.0	12.7
20230529	住院	Patient	男	26天	静脉血	红细胞、白细胞、血小板形态未见异常。				Pending			0.01	0.1		0.41	6.0	32.5		108				1.56	22.6	31.3	332.0	94.2		0.57	8.2	——		4.35	63.1	——	——	——	81		3.45	19.3	65.2				6.9	138.5
20230531	住院	Patient	男	28天	静脉血	红细胞、白细胞、血小板形态未见异常。	000353^1^6^1			UNACCEPT			0.02	0.2		0.28	2.3	27.8		98				2.41	19.6	31.3	353.0	88.8		0.82	6.7	——		8.76	71.2	——	——	——	37	37	3.13	18.9	59.6				12.3	62.8
20230504	住院	Patient	女	26天	静脉血	红细胞、白细胞、血小板形态未见异常。镜下血小板难见.				Stain-Status Success			0.01	0.1		0.39	2.8	28.7		98				2.03	14.5	32.9	341.0	96.3		1.13	8.1	——		10.43	74.5	——	——	——	22		2.98	16.4	58.2				14.0	127.8
20230507	住院	Patient	女	29天	静脉血	红细胞形态未见异常,白细胞形态未见异常,光学计数PLT.	000043^37^2^1	手工复查		3R已完成+Stain-Status Success			0.17	0.7		1.11	4.6	34.4		123				4.34	18.0	31.7	358.0	88.7		1.01	4.2	——		17.47	72.5	——	——	——	3	5	3.88	16.1	51.7				24.1	211.1
20230508	住院	Patient	女	1月0天	静脉血	红细胞、白细胞、形态未见异常，镜下难见血小板。	000045^48^1^1			3R已完成+Smear-Error			0.10	0.9		0.57	4.9	26.2		93				2.61	22.5	31.5	355.0	88.8		0.38	3.3	——		7.93	68.4	——	——	——	5	5	2.95	16.4	53.6				11.6	173.5
20230520	住院	Patient	男	2天	静脉血	镜下评估血小板与仪器计数一致，可见大血小板。红细胞、白细胞形态未见异常。				3R已完成+Stain-Status Success			0.05	0.3		0.55	3.6	48.6		171				1.99	12.9	36.8	352.0	104.5		1.59	10.3	-----		11.23	72.9	-----	-----	-----	84	84	4.65	19.2	71.0				15.4	17.4
20230521	住院	Patient	男	1天	静脉血	已手工分类白细胞,红细胞、血小板形态未见异常.				17.5								49.1		145				9.84	48.0	28.2	295.0	95.5		1.23	6.0	——		9.43	46.0	——	——	——	33	33	5.14	26.4	85.3				20.5	22.4
20230522	住院	Patient	男	9天	静脉血	红细胞、白细胞、血小板形态未见异常。		手工复查					0.02	0.3		0.24	3.0	33.3		122				2.54	31.8	33.3	366.0	91.0		1.20	15.0	-----		3.99	49.9	-----	-----	-----	86	86	3.66	16.3	53.9				8.0	44.8
20230525	住院	Patient	女	3月	静脉血	红细胞、白细胞、血小板形态未见异常。	000075^36^4^1			ACCEPT			0.06	0.5		0.04	0.3	32.1		113				2.40	20.5	31.0	352.0	88.2		1.71	14.6	——		7.50	64.1	——	——	——	83		3.64	15.9	50.6				11.7	119.3
20230526	住院	Patient	男	6天	静脉血	已手工分类白细胞,血小板形态未见异常.外周成熟RBC大小不等,部分中空淡染区明显扩大，镜下可见不规则异形RBC。白细胞分类绝对值请按照校正白细胞计算。	000339^31^3^1			38.0	0.33	3.0				0.33	3.0	48.3		146				4.11	37.0	27.0	302.0	89.3		1.44	13.0	——		4.88	44.0	——	——	——	127	127	5.41	27.3	82.9				11.1	21.2
20230527	住院	Patient	男	24天	静脉血	已手工分类白细胞,红细胞、血小板形态未见异常.	000033^111^1^1			2.1			0.02	1.0		0.05	2.0	35.5		121				0.99	43.0	31.3	341.0	92.0		0.23	10.0	——		0.99	43.0	——	——	——	95	95	3.86	20.3	65.6				2.3	116.1
20230527	住院	Patient	男	7天	静脉血	已手工分类白细胞,红细胞、血小板形态未见异常.白细胞分类绝对值请按照校正白细胞计算。				17.0						0.13	1.0	47.1		142				5.17	41.0	26.6	301.0	88.2		1.13	9.0	——		5.92	47.0	——	——	——	99	99	5.34	27.1	82.2				12.6	15.7
20230527	住院	Patient	女	3月	静脉血	红细胞、白细胞、血小板形态未见异常。				Reflex			0.07	0.4		0.14	0.8	36.5		123				4.21	23.9	30.1	342.0	88.0		3.24	18.4	——		9.94	56.5	——	——	——	65	65	4.15	15.4	49.0				17.6	105.2
20230528	住院	Patient	男	25天	静脉血	红细胞、白细胞、血小板形态未见异常。	000094^49^5^1			UNACCEPT			0.04	0.9		0.33	7.2	35.1		111				1.16	25.3	30.7	316.0	97.0		0.28	6.1	——		2.78	60.5	——	——	——	42	42	3.62	20.5	70.7				4.6	151.4
20230528	住院	Patient	女	3月	静脉血	已手工分类白细胞,红细胞、血小板形态未见异常.				Smear-Status Success	0.47	2.0				0.23	1.0	37.7		126				4.47	19.0	30.6	334.0	91.5		2.82	12.0	——		12.93	55.0	——	——	——	98	98	4.12	15.9	53.2				23.5	50.4
20230530	住院	Patient	男	27天	静脉血	红细胞形态未见异常,白细胞形态未见异常,光学计数PLT.				UNACCEPT			0.04	0.3		0.27	2.3	29.5		106				2.20	18.5	31.3	359.0	87.0		1.09	9.2	-----		8.29	69.7	-----	-----	-----	47	47	3.39	18.2	56.0				11.9	75.0
20230601	住院	Patient	女	14天	静脉血	红细胞、白细胞、血小板形态未见异常。				ACCEPT			0.01	0.2		0.22	4.2	34.8		117				2.17	41.7	35.5	336.0	105.5		0.59	11.4	——		2.21	42.5	——	——	——	126		3.30	18.3	71.5				5.2	7.8
20230601	住院	Patient	男	29天	静脉血	红细胞、白细胞、血小板形态未见异常。				UNACCEPT			0.03	0.2		0.26	1.8	27.7		95				2.84	19.3	31.4	343.0	91.4		0.71	4.8	——		10.86	73.9	——	——	——	36		3.03	19.5	62.2				14.7	80.9
20230602	住院	Patient	男	30天	静脉血	红细胞、白细胞、血小板形态未见异常。				Reflex			0.03	0.2		0.20	1.2	27.1		94				2.36	14.4	31.8	347.0	91.6		0.75	4.6	——		13.05	79.6	——	——	——	50		2.96	19.1	60.4				16.4	73.6
20230603	住院	Patient	男	1月0天	静脉血	红细胞、白细胞、血小板形态未见异常。				ACCEPT			0.09	0.4		0.44	1.9	32.8		116				3.08	13.4	31.4	354.0	88.9		1.08	4.7	——		18.31	79.6	——	——	——	87	87	3.69	19.4	59.3				23.0	53.1
20230607	住院	Patient	男	1月4天	静脉血	红细胞、白细胞、血小板形态未见异常。				ACCEPT			0.07	0.5		0.19	1.3	35.3		118				3.22	22.5	29.8	334.0	89.1		0.97	6.8	——		9.85	68.9	——	——	——	125		3.96	18.3	52.8				14.3	46.5
20230608	住院	Patient	男	1月5天	静脉血	红细胞、白细胞、血小板形态未见异常。				Pending			0.09	0.4		0.02	0.1	32.2		112				6.46	28.6	30.4	348.0	87.3		2.10	9.3	——		13.92	61.6	——	——	——	189		3.69	18.6	51.8				22.6	35.3
20230619	住院	Patient	男	2月3天	静脉血	红细胞、白细胞、血小板形态未见异常。	000059^53^5^1			3R已完成			0.00	0.0		0.05	0.8	22.2		76				1.47	23.3	28.7	342.0	83.8		0.81	12.8	——		3.98	63.1	——	——	——	61	61	2.65	17.2	52.7				6.3	41.5
20230620	住院	Patient	男	2月4天	静脉血	红细胞、白细胞、血小板形态未见异常。	000061^52^6^1			3R已完成+Smear-Status Success			0.01	0.1		0.05	0.6	37.1		131				4.47	50.8	30.3	353.0	85.9		1.40	15.9	——		2.87	32.6	——	——	——	56	56	4.32	15.8	49.1				8.8	51.3
20230617	住院	Patient	男	2月1天	静脉血	红细胞形态未见异常,白细胞形态未见异常,光学计数PLT.	000090^38^4^1			ACCEPT			0.01	0.1		0.10	1.1	25.6		82				4.28	46.5	28.8	320.0	89.8		1.62	17.6	-----		3.19	34.7	-----	-----	-----	83	83	2.85	17.3	57.1				9.2	53.4
20230617	住院	Patient	男	11天	静脉血	红细胞、白细胞、血小板形态未见异常。				ACCEPT			0.05	0.4		0.55	4.5	50.5		179				1.62	13.3	34.4	354.0	97.1		2.17	17.8	——		7.81	64.0	——	——	——	212		5.20	16.0	57.1				12.2	24.6
20230623	住院	Patient	男	1月16天	静脉血	已手工分类白细胞,红细胞、血小板形态未见异常.	000338^39^2^1			1.0								20.2		70				1.36	17.0	31.0	347.0	89.4		1.28	16.0	——		4.96	62.0	——	——	——	24	24	2.26	16.1	52.1				8.0	77.2
20230703	住院	Patient	男	22天	静脉血	红细胞、白细胞形态未见异常。镜下血小板偶见.				UNACCEPT			0.02	0.2		0.63	7.2	32.5		111				5.05	58.0	31.1	342.0	91.0		1.54	17.7	——		1.47	16.9	——	——	——	28	28	3.57	15.3	51.1				8.7	38.9
20230712	住院	Patient	女	9天	末梢血	外周成熟RBC大小不等,以中小为主,部分中空淡染区扩大，镜下可见不规则异形RBC。				ACCEPT			0.01	0.1		0.08	0.6	38.9		136				3.33	24.7	26.4	350.0	75.4		2.36	17.5	——		7.71	57.1	——	——	——	99		5.16	24.2	63.2				13.5	7.0
20230713	住院	Patient	女	10天	静脉血	外周成熟RBC大小不等,以中小为主,部分中空淡染区扩大，镜下可见不规则异形RBC。				ACCEPT			0.03	0.2		0.44	3.2	49.0		164				1.92	13.8	25.9	335.0	77.4		1.96	14.1	——		9.55	68.7	——	——	——	221		6.33	26.9	67.3				13.9	13.6
20230701	住院	Patient	男	20天	静脉血	镜下血小板少见。	000067^7^4^1			UNACCEPT			0.01	0.1		0.70	9.4	36.1		127				3.63	49.0	31.8	352.0	90.3		0.75	10.1	——		2.32	31.4	——	——	——	40	40	4.00	15.5	51.4				7.4	65.1
20230711	住院	Patient	女	8天	静脉血	镜下血小板少见.红细胞、白细胞形态未见异常。	000338^94^1^1	手工复查		UNACCEPT			0.03	0.2		0.03	0.2	42.0		140				1.51	12.0	25.7	333.0	77.2		1.56	12.4	——		9.48	75.2	——	——	——	65	65	5.44	25.0	66.0				12.6	12.2
20230721	住院	Patient	男	16天	静脉血	红细胞形态未见异常,白细胞形态未见异常,光学计数PLT.镜下血小板少见		手工复查		3R已完成+Stain-Error			0.05	0.4		0.03	0.2	51.8		185				3.52	26.5	30.8	357.0	86.2		1.50	11.3	——		8.19	61.6	——	——	——	55	55	6.01	15.9	47.8				13.3	55.1
20230722	住院	Patient	男	17天	静脉血	红细胞形态未见异常,白细胞形态未见异常,光学计数PLT.				UNACCEPT			0.03	0.2		0.05	0.4	47.3		167				4.13	32.8	30.8	353.0	87.1		1.60	12.7	——		6.79	53.9	——	——	——	73	73	5.43	15.5	47.5				12.6	42.8
20230723	住院	Patient	男	18天	静脉血	红细胞、白细胞、血小板形态未见异常。				ACCEPT			0.02	0.2		0.28	2.7	45.7		154				3.99	38.0	30.1	337.0	89.3		1.27	12.1	——		4.93	47.0	——	——	——	96		5.12	14.5	47.8				10.5	18.2
20230801	住院	Patient	男	14天	静脉血	红细胞、白细胞、血小板形态未见异常。				ACCEPT			0.01	0.1			0.43	3.1	38.9		132				2.09	14.9	33.7	339.0	99.2		2.77	19.8	——		8.69	62.1	——		——	——	259		3.92	15.6	55.5				14.0
20230803	住院	Patient	男	16天	静脉血	红细胞、白细胞、血小板形态未见异常。				ACCEPT			0.02	0.2			0.57	6.3	37.5		125				3.29	36.1	33.2	333.0	99.7		1.91	21.0	——		3.31	36.4	——		——	——	222		3.76	15.5	56.3				9.1
20230804	住院	Patient	女	1月8天	静脉血	已手工分类白细胞,红细胞、血小板形态未见异常.				0.2	0.22	2.0					0.33	3.0	24.6		80				6.65	61.0	32.9	325.0	101.2		0.44	4.0	——		3.16	29.0	——		——	——	66	66	2.43	15.2	55.9				10.9
20230815	住院	Patient	男	12天	静脉血	已手工分类白细胞,红细胞、血小板形态未见异常.				8.0	0.10	2.0					0.05	1.0	38.4		128				2.14	42.0	34.7	333.0	104.1		1.07	21.0	——		1.02	20.0	——		——	——	114	114	3.69	19.9	76.2				5.1
20230816	住院	Patient	男	13天	静脉血	已手工分类白细胞,红细胞、血小板形态未见异常.查见裂片红细胞1%.				Stain-Status Success	0.16	2.0							38.9		126				2.61	33.0	33.6	324.0	103.7		1.03	13.0	——		3.79	48.0	——		——	——	129		3.75	20.0	77.6				7.9
20230816	住院	Patient	女	11天	静脉血	红细胞、白细胞、血小板形态未见异常。				ACCEPT			0.01	0.2			0.01	0.2	34.3		124				1.42	23.7	37.7	362.0	104.3		0.41	6.8	——		4.15	69.1	——		——	——	70	70	3.29	15.5	59.9				6.0
20230817	住院	Patient	女	13天	静脉血	已手工分类白细胞,红细胞、血小板形态未见异常.	000350^27^2^1			3R已完成+Stain-Status Success	0.63	9.0					0.14	2.0	33.7		116				3.29	47.0	35.9	344.0	104.3		0.28	4.0	——		2.66	38.0	——		——	——	68	68	3.23	15.4	59.7				7.0
20230827	住院	Patient	男	3天	静脉血	已手工分类白细胞,红细胞形态未见异常.镜下血小板偶见.	000076^36^5^1			3R已完成+Stain-Status Success	0.93	9.0					0.31	3.0			135				3.19	31.0	33.8	367.0	92.2		0.21	2.0	——		5.67	55.0	——		——	——	22		3.99	15.4	52.1				10.3
20230828	住院	Patient	男	4天	静脉血	已手工分类白细胞,红细胞、血小板形态未见异常.	000050^32^1^1			UNACCEPT	1.15	6.0					0.38	2.0			124				12.80	67.0	34.3	363.0	94.7		0.57	3.0	——		4.20	22.0	——		——	——	25	25	3.61	15.6	54.0				19.1
20230829	住院	Patient	女	5天	静脉血	已手工分类白细胞,红细胞、血小板形态未见异常.				100.00	0.49	8.0									142				2.26	37.0	34.9	353.0	98.8		0.37	6.0	——		2.99	49.0	——		——	——	45	45	4.07	15.1	55.0				6.1
20230829	住院	Patient	女	2月1天	静脉血	红细胞、白细胞、血小板形态未见异常。				26.4			0.04	0.2			0.17	0.8			91				10.43	49.9	30.8	345.0	89.5		2.34	11.2	——		7.92	37.9	——		——	——	130		2.95	16.1	52.3				20.9
20230829	住院	Patient	女	2月2天	静脉血	红细胞形态未见异常,白细胞形态未见异常,光学计数PLT.				38.7			0.04	0.4			0.06	0.6			136				6.24	63.0	31.3	351.0	89.0		0.88	8.9	——		2.68	27.1	——		——	——	81	81	4.35	15.1	49.0				9.9
20230830	住院	Patient	女	2月3天	末梢血	红细胞、白细胞、血小板形态未见异常。				ACCEPT			0.01	0.1			0.18	2.5			101				3.41	46.7	30.4	342.0	88.9		0.97	13.3	——		2.73	37.4	——		——	——	86		3.32	15.0	48.8				7.3
20230805	住院	Patient	女	1月9天	静脉血	已手工分类白细胞,红细胞、血小板形态未见异常.				0.24	1.67	7.0					0.24	1.0	32.9		110				13.80	58.0	30.8	334.0	92.2		1.67	7.0	——		5.47	23.0	——		——	——	70	70	3.57	16.6	55.2				23.8
20230805	住院	Patient	女	1月2天	静脉血	已手工分类白细胞,红细胞、血小板形态未见异常.				0.50	0.42	5.0	0.08	1.0			0.08	1.0	44.2		156				2.02	24.0	32.6	353.0	92.3		0.67	8.0	——		4.28	51.0	——		——	——	117		4.79	17.8	54.3				8.4
20230901	住院	Patient	女	4天	静脉血	红细胞、白细胞、血小板形态未见异常。				43.3			0.00	0.0		0.40	7.4			148				0.99	18.4	35.9	342.0	105.1		0.78	14.5	——			3.22	59.7	——	——	——	107		4.12	18.8	70.7				5.4	20.5
20230902	住院	Patient	女	2月6天	静脉血	红细胞、白细胞、血小板形态未见异常。				24.4			0.00	0.0		0.58	13.5			84				2.22	51.7	31.0	344.0	90.0		0.68	15.8	——			0.82	19.0	——	——	——	129		2.71	16.0	51.1				4.3	55.8
20230904	住院	Patient	女	2月8天	静脉血	红细胞、白细胞、血小板形态未见异常。				32.5			0.02	0.2		0.70	8.8			114				3.98	49.8	30.9	351.0	88.1		1.20	15.0	——			2.10	26.2	——	——	——	90		3.69	15.6	49.5				8.0	64.8
20230905	住院	Patient	男	24天	静脉血	已手工分类白细胞,红细胞形态未见异常.镜下血小板难见.白细胞分类绝对值请按照校正白细胞计算。				UNACCEPT	0.98	11.0				0.09	1.0			100				3.74	42.0	33.4	347.0	96.3		0.53	6.0	——			1.25	14.0	——	——	——	20	20	2.99	15.3	53.2				8.9	24.7
20230908	住院	Patient	男	1天	静脉血	红细胞、白细胞、血小板形态未见异常。	000098^54^4^1			ACCEPT			0.09	0.6		0.36	2.4			164				3.40	22.5	26.8	331.0	80.8		0.57	3.8	——			10.68	70.7	——	——	——	197		6.13	20.7	50.5				15.1	9.7
20230910	住院	Patient	女	4天	静脉血	已手工分类白细胞,红细胞、血小板形态未见异常.镜下少见血小板.				Stain-Status Success	0.07	2.0								166				0.74	20.0	40.9	354.0	115.5		0.96	26.0	——			1.92	52.0	——	——	——	89	89	4.06	17.6	75.0				3.7	26.8
20230910	住院	Patient	女	4天	静脉血	红细胞、白细胞、血小板形态未见异常。				ACCEPT			0.01	0.2		0.00	0.0			119				0.34	5.1	40.5	357.0	113.3		2.32	35.1	——			3.93	59.6	——	——	——	77	77	2.94	17.4	71.8				6.6	55.7
20230911	住院	Patient	女	5天	静脉血	红细胞、白细胞、血小板形态未见异常。	000019^108^6^1			3R已完成			0.01	0.2		0.02	0.3			154				0.36	6.2	36.6	347.0	105.5		2.00	34.4	——			3.42	58.9	——	——	——	57	57	4.21	25.5	98.0				5.8	44.5
20230911	住院	Patient	女	21天	静脉血	红细胞、白细胞、血小板形态未见异常。				UNACCEPT			0.01	0.1		0.34	4.3			112				3.56	44.5	31.4	337.0	93.0		1.41	17.6	——			2.68	33.5	——	——	——	52		3.57	13.5	45.9				8.0	62.1
20230912	住院	Patient	女	6天	静脉血	红细胞、白细胞、血小板形态未见异常。				44.3			0.00	0.0		0.30	4.7			159				1.49	23.3	37.0	359.0	103.0		1.94	30.3	——			2.67	41.7	——	——	——	81	81	4.30	24.0	89.6				6.4	22.9
20230913	住院	Patient	男	2天	静脉血	已手工分类白细胞,红细胞、血小板形态未见异常.光学计数PLT.				36.0						0.06	2.0			121				0.96	32.0	34.6	336.0	102.9		0.30	10.0	——			1.56	52.0	——	——	——	38	38	3.50	20.5	77.2				3.0	27.8
20230928	住院	Patient	女	21天	静脉血	已手工分类白细胞,红细胞形态未见异常.镜下血小板难见.部分中性粒细胞胞浆查见空泡、中毒颗粒。光学计数PLT.				100.00						0.83	6.0	47.7		162				1.11	8.0	30.5	340.0	89.7		1.11	8.0	——			10.43	75.0	——	——	——	4	4	5.32	18.5	59.4				13.9	93.2
20230929	住院	Patient	女	22天	静脉血	已手工分类白细胞,红细胞、血小板形态未见异常.				6.0								38.7		138				6.88	32.0	31.1	357.0	87.2		2.15	10.0	——			10.75	50.0	——	——	——	20	20	4.44	17.3	55.2				21.5	65.0
20231001	住院	Patient	女	24天	静脉血	红细胞形态未见异常,白细胞形态未见异常,光学计数PLT.镜下血小板减少。	000014^42^2^1			UNACCEPT			0.00	0.0		0.87	14.5	30.9		108				1.98	33.0	31.1	350.0	89.0		0.92	15.3	——			2.23	37.2	——	——	——	48	48	3.47	17.2	56.2				6.0	11.8
20231002	住院	Patient	女	25天	静脉血	红细胞形态未见异常,白细胞形态未见异常,光学计数PLT.				Reflex			0.01	0.1		0.98	11.7	31.3		107				2.88	34.3	30.8	342.0	90.2		0.67	8.0	——			3.86	45.9	——	——	——	39	39	3.47	17.2	56.5				8.4	15.8
20231003	住院	Patient	女	26天	静脉血	红细胞形态未见异常,白细胞形态未见异常,光学计数PLT.	000059^97^4^1			UNACCEPT			0.02	0.1		0.06	0.4	33.7		119				5.36	33.1	31.1	353.0	88.0		1.28	7.9	——			9.48	58.5	——	——	——	56	56	3.83	16.8	53.4				16.2	11.8
20231007	住院	Patient	女	13天	静脉血	已手工分类白细胞,红细胞、血小板形态未见异常.标本无凝块，PLT低，请结合临床	000050^91^4^1			100.00	0.05	1.0				0.60	13.0	32.0		114				2.62	57.0	36.2	356.0	101.6		0.14	3.0	——			1.06	23.0	——	——	——	40	40	3.15	15.1	56.3				4.6	245.6
20231007	住院	Patient	男	28天	静脉血	白细胞太少未分类,红细胞形态未见异常。镜下血小板难见，可见大血小板。				3R已完成			0.00	0.0		0.07	5.5	26.1		90				0.35	26.6	30.7	345.0	89.1		0.19	14.8	——			0.69	53.1	——	——	——	22	22	2.93	16.9	54.7				1.3	92.6
20231008	住院	Patient	女	14天	静脉血	镜下血小板少见	000029^24^5^1			3R已完成+Stain-Status Success			0.02	0.3		0.64	8.6	31.0		113				2.60	35.2	36.1	365.0	99.0		0.45	6.1	——			3.69	49.8	——	——	——	35	35	3.13	14.9	54.1				7.4	100.2
20231008	住院	Patient	男	29天	静脉血	已手工分类白细胞,红细胞、血小板形态未见异常.				UNACCEPT			0.05	1.0		0.10	2.0	41.3		154				1.90	38.0	31.0	373.0	83.3		0.55	11.0	——			2.10	42.0	——	——	——	46	46	4.96	14.6	43.9				5.0	56.9
20231010	住院	Patient	男	1月1天	静脉血	已手工分类白细胞,红细胞、血小板形态未见异常.镜下血小板偶见，光学计数PLT.				0.08								39.5		142				1.85	22.0	30.3	359.0	84.4		0.76	9.0	——		5.12	61.0		——	——	——	33	33	4.68	15.4	46.9					8.4
20231011	住院	Patient	男	1月2天	静脉血	已手工分类白细胞,红细胞、血小板形态未见异常.				100.00								43.2		150				1.46	11.0	30.7	347.0	88.5		0.53	4.0	——		10.64	80.0		——	——	——	102		4.88	15.9	51.1					13.3
20231012	住院	Patient	男	4天	静脉血	已手工分类白细胞,红细胞、血小板形态未见异常.	000068^74^1^1			1.0	0.06	2.0						33.2		115				1.92	64.0	32.1	346.0	92.7		0.15	5.0	——		0.84	28.0		——	——	——	19	19	3.58	21.1	60.7					3.0
20231014	住院	Patient	女	11天	静脉血	红细胞、白细胞、血小板形态未见异常。				UNACCEPT			0.01	0.1		0.21	2.6	34.4		131				1.90	23.4	35.0	381.0	92.0		0.86	10.6	——		5.13	63.3		——	——	——	70	70	3.74	20.1	67.5					8.1
20231014	住院	Patient	男	1月5天	静脉血	红细胞、白细胞、血小板形态未见异常。				ACCEPT			0.02	0.1		0.00	0.0	38.2		127				2.91	16.0	29.5	332.0	88.6		3.77	20.7	——		11.50	63.2		——	——	——	144		4.31	16.3	53.0					18.2
20231015	住院	Patient	男	7天	静脉血	红细胞、白细胞形态未见异常。镜下血小板偶见.				Smear-Error			0.01	0.3		0.20	6.0	42.3		143				1.74	51.2	32.0	338.0	94.6		0.54	16.0	——		0.90	26.5		——	——	——	13	13	4.47	17.6	55.8					3.4
20231017	住院	Patient	男	7天	静脉血	红细胞、白细胞、血小板形态未见异常。				ACCEPT			0.01	0.1		0.70	7.1	37.0		127				3.29	33.6	34.5	343.0	100.5		0.54	5.5	——		5.26	53.7		——	——	——	117	117	3.68	15.8	58.0					9.8
20231017	住院	Patient	男	13天	静脉血	已手工分类白细胞,红细胞、血小板形态未见异常.白细胞分类绝对值请按照校正白细胞计算。				18.0	0.00		0.00			0.00		24.7		84				1.51	42.0	33.9	340.0	99.6		0.32	9.0	——		1.12	31.0		——	——	——	64	64	2.48	19.8	71.3					3.6
20231019	住院	Patient	男	1月26天	静脉血	红细胞、白细胞、血小板形态未见异常。				ACCEPT			0.01	0.1		0.01	0.1	37.6		131				1.12	14.7	30.0	348.0	86.2		1.20	15.8	——		5.27	69.3		——	——	——	95	95	4.36	17.4	53.5					7.6
20231020	住院	Patient	男	1月27天	静脉血	红细胞、白细胞、血小板形态未见异常。				Review			0.01	0.1		0.03	0.2	29.2		104				3.74	29.9	30.1	356.0	84.4		1.94	15.5	——		6.79	54.3		——	——	——	58	58	3.46	17.3	52.7					12.5
20231021	住院	Patient	男	1月28天	静脉血	红细胞形态未见异常,白细胞形态未见异常,光学计数PLT.				3R已完成			0.01	0.1		0.28	3.1	28.4		99				4.59	51.0	29.3	349.0	84.0		1.04	11.6	——		3.08	34.2		——	——	——	67	67	3.38	17.2	53.2					9.0
20231021	住院	Patient	男	13天	静脉血	已手工分类白细胞,红细胞、血小板形态未见异常.				Stain-Status Success	0.38	5.0	0.08	1.0		0.08	1.0	31.9		115				3.60	48.0	36.6	361.0	101.6		1.13	15.0	——		2.10	28.0		——	——	——	81		3.14	15.8	58.5					7.5
20231022	住院	Patient	男	14天	静脉血	红细胞、白细胞、血小板形态未见异常。	000338^51^4^1			ACCEPT			0.03	0.4		0.41	4.8	30.6		110				5.39	62.7	36.1	359.0	100.3		1.20	14.0	——		1.56	18.1		——	——	——	88		3.05	15.8	58.5					8.6
20231101	住院	Patient	男	19天	静脉血	已手工分类白细胞,红细胞、血小板形态未见异常.				1.50						0.25	1.0	36.0		122				2.75	11.0	34.3	339.0	101.1		5.25	21.0	——		14.50	58.0		——	——	——	41		3.56	19.4	70.2					25.0
20231101	住院	Patient	男	19天	静脉血	已手工分类白细胞,红细胞、血小板形态未见异常.				0.4			0.38	1.0				28.3		91				1.13	3.0	35.7	322.0	111.0		10.13	27.0	——		22.50	60.0		——	——	——	74		2.55	18.9	76.9					37.5
20231102	住院	Patient	男	20天	静脉血	镜下血小板偶见				UNACCEPT						0.32	4.0	40.7		142				1.20	15.0	35.3	349.0	101.2		0.56	7.0	——		5.84	73.0		——	——	——	11	11	4.02	20.8	75.2					8.0
20231103	住院	Patient	男	21天	静脉血	已手工分类白细胞,红细胞、血小板形态未见异常.				2.0	0.41	1.0				1.23	3.0	28.2		106				1.64	4.0	34.6	376.0	92.2		11.48	28.0	——		25.01	61.0		——	——	——	16	16	3.06	17.7	58.5					41.0
20231104	住院	Patient	男	22天	静脉血	红细胞、白细胞形态未见异常。镜下血小板少见。				5.0						1.51	5.0	26.7		96				2.72	9.0	34.2	360.0	95.0		2.72	9.0	——		20.84	69.0		——	——	——	41		2.81	18.0	61.5					30.2
20231105	住院	Patient	男	23天	静脉血	镜下血小板少见.已手工分类白细胞,红细胞形态未见异常.				100.00						1.58	6.0	41.4		147				5.00	19.0	32.2	355.0	90.6		4.21	16.0	——		15.52	59.0		——	——	——	28		4.57	18.8	59.7					26.3
20231106	住院	Patient	男	24天	静脉血	已手工分类白细胞,红细胞、血小板形态未见异常.				20.7						0.84	4.0	41.4		145				3.38	16.0	32.2	350.0	91.8		1.06	5.0	——		15.83	75.0		——	——	——	22		4.51	18.6	60.7					21.1
20231107	住院	Patient	男	25天	静脉血	已手工分类白细胞,红细胞形态未见异常.镜下血小板少见。				0.4						0.41	2.0	38.6		137				5.36	26.0	32.2	355.0	90.6		1.24	6.0	——		12.36	60.0		——	——	——	27	27	4.26	17.8	58.4					20.6
20231108	住院	Patient	男	26天	静脉血	已手工分类白细胞,红细胞、血小板形态未见异常.				UNACCEPT						0.21	1.0	40.1		134				4.51	22.0	31.2	334.0	93.5		2.67	13.0	——		12.30	60.0		——	——	——	34	34	4.29	18.6	61.9					20.5
20231110	住院	Patient	男	1月0天	静脉血	已手工分类白细胞,红细胞、血小板形态未见异常.				1.0	0.27	2.0				0.14	1.0	27.0		95				6.53	48.0	31.9	352.0	90.6		0.95	7.0	——		4.62	34.0		——	——	——	79	79	2.98	17.3	56.9					13.6
20231130	住院	Patient	女	23天	静脉血	已手工分类白细胞,红细胞、血小板形态未见异常.镜下血小板难见.光学计数PLT.				100.00								32.9		115				0.75	44.0	31.8	350.0	90.9		0.17	10.0	——		0.78	46.0		——	——	——	13	13	3.62	16.7	55.2					1.7
20231209	住院	Patient	男	13天	静脉血	红细胞、白细胞、血小板形态未见异常。	000021^100^5^1			3R已完成			0.02	0.2		0.40	3.4	33.7		115				4.78	40.2	34.0	341.0	99.7		0.90	7.6	——		5.78	48.6		——	——	——	71	71	3.38	15.7	58.0					11.9
20231216	住院	Patient	女	2天	静脉血	已手工分类白细胞,红细胞、血小板形态未见异常.白细胞分类绝对值请按照校正白细胞计算。				0.26								42.3		138				1.18	9.0	28.8	326.0	88.3		0.79	6.0	——		10.61	81.0		——	——	——	43	43	4.79	28.4	86.1					13.1
20231016	住院	Patient	女	2天	静脉血	已手工分类白细胞,红细胞、血小板形态未见异常.	000026^87^3^1			2.0								48.6		159				1.80	20.0	39.8	327.0	121.8		0.27	3.0	——		6.75	75.0		——	——	——	18	18	3.99	25.2	112.5					9.0
20231016	住院	Patient	女	1月10天	静脉血	红细胞、白细胞、血小板形态未见异常。				UNACCEPT			0.01	0.1		0.77	6.3	36.9		128				1.72	14.1	31.2	347.0	90.0		2.06	16.9	——		7.64	62.6		——	——	——	76	76	4.10	14.6	47.4					12.2
20231017	住院	Patient	女	3天	静脉血	已手工分类白细胞,红细胞形态未见异常,血小板少见.				6.0						0.44	7.0	40.4		132				2.14	34.0	39.3	327.0	120.2		0.25	4.0	——		3.40	54.0		——	——	——	9	9	3.36	24.4	106.6					6.3
20231026	住院	Patient	女	4天	末梢血	末梢血HGB结果仅供参考，建议行静脉血复查。红细胞、白细胞、血小板形态未见异常。				ACCEPT			0.14	0.8		1.12	6.6	58.2		191				3.66	21.5	33.1	328.0	100.9		2.18	12.8	——		9.91	58.3		——	——	——	137		5.77	25.2	87.6					17.0
20231109	住院	Patient	女	26天	静脉血	红细胞、白细胞形态未见异常。镜下血小板少见.				UNACCEPT			0.01	0.2		0.02	0.4	34.5		121				1.41	26.6	31.7	351.0	90.3		0.06	1.2	——		3.79	71.6		——	——	——	44	44	3.82	19.4	61.0					5.3
20231113	住院	Patient	男	2月4天	静脉血	红细胞、白细胞、血小板形态未见异常。				ACCEPT			0.01	0.2		0.03	0.7	30.5		104				0.96	23.5	28.7	341.0	84.3		0.35	8.5	——		2.75	67.1		——	——	——	139		3.62	15.5	47.6					4.1
20231201	住院	Patient	男	1月28天	静脉血	已手工分类白细胞,红细胞形态未见异常.镜下血小板少见。				Stain-Error						0.08	2.0	21.6		74				2.27	54.0	30.1	343.0	87.8		0.29	7.0	——		1.30	31.0		——	——	——	13	13	2.46	14.3	45.8					4.2
20231202	住院	Patient	女	25天	静脉血	白细胞太少未分类,红细胞形态未见异常。镜下血小板偶见。	000086^109^1^1			Stain-Status Success			0.00	0.0		0.07	4.2	35.5		119				0.79	46.7	30.7	335.0	91.5		0.24	13.9	——		0.60	35.2		——	——	——	18	18	3.88	16.0	53.8					1.7
20231203	住院	Patient	男	2月0天	静脉血	镜下血小板偶见.已手工分类白细胞,红细胞形态未见异常.	000095^5^4^1			UNACCEPT								27.8		95				2.96	16.0	30.2	342.0	88.3		1.30	7.0	——		13.88	75.0		——	——	——	19	19	3.15	15.0	48.5					18.5
20231206	住院	Patient	女	29天	静脉血	红细胞、白细胞、血小板形态未见异常。				3R已完成			0.02	0.3		0.09	1.2	30.9		109				2.66	35.5	30.9	353.0	87.5		1.43	19.0	——		3.30	44.0		——	——	——	38	38	3.53	14.9	47.6					7.5
20231208	住院	Patient	男	12天	静脉血	红细胞形态未见异常,白细胞形态未见异常,光学计数PLT.				UNACCEPT			0.04	0.2		0.44	2.1	31.3		115				4.78	23.0	35.0	367.0	95.1		1.66	8.0	——		13.87	66.7		——	——	——	36	36	3.29	15.5	54.2					20.8
20231212	住院	Patient	女	17天	静脉血	已手工分类白细胞,红细胞、血小板形态未见异常.白细胞分类绝对值请按照校正白细胞计算。				Pending								37.4		125				2.77	35.0	32.4	334.0	96.9		0.71	9.0	——		4.42	56.0		——	——	——	89	89	3.86	16.0	56.2					7.9
20231213	住院	Patient	女	18天	静脉血	已手工分类白细胞,红细胞形态未见异常，镜下查见大血小板.	000045^104^5^1			1.0						0.44	5.0	34.4		114				3.74	43.0	32.4	331.0	97.7		0.78	9.0	——		3.65	42.0		——	——	——	70	70	3.52	16.0	57.3					8.7
20231216	住院	Patient	女	3天	静脉血	已手工分类白细胞,红细胞、血小板形态未见异常.	000040^42^2^1			1.0	0.09	1.0				0.27	3.0	37.5		128				1.55	17.0	37.6	341.0	110.3		0.46	5.0	——		6.37	70.0		——	——	——	77		3.40	25.5	100.5					9.1
20231217	住院	Patient	女	4天	静脉血	已手工分类白细胞,红细胞、血小板形态未见异常.白细胞分类绝对值请按照校正白细胞计算。				6.6						0.15	2.0	34.1		124				1.52	20.0	39.0	364.0	107.2		0.15	2.0	——		5.17	68.0		——	——	——	75	75	3.18	25.2	97.3					7.6
20231221	住院	Patient	男	1月20天	静脉血	红细胞形态未见异常,白细胞形态未见异常,光学计数PLT.				3R已完成			0.01	0.3		0.06	2.0	31.4		105				0.37	12.9	31.3	334.0	93.5		0.06	2.0	——		2.40	82.8		——	——	——	53	53	3.36	16.9	56.1					2.9
20231208	住院	Patient	女	4天	静脉血	红细胞形态未见异常,白细胞形态未见异常,光学计数PLT.	000349^77^5^1			UNACCEPT			0.07	1.3		0.32	6.0	44.1		153				0.66	12.5	34.3	347.0	98.9		0.33	6.2	——		3.92	74.0		——	——	——	34	34	4.46	14.1	51.7					5.3
20231207	住院	Patient	女	4天	静脉血	红细胞、白细胞、血小板形态未见异常。				3R已完成			0.06	1.4		0.16	3.8	45.0		161				0.58	13.4	34.0	358.0	95.1		0.21	4.8	——		3.29	76.6		——	——	——	27	27	4.73	14.2	49.2					4.3
20231211	住院	Patient	女	8天	静脉血	红细胞、白细胞、血小板形态未见异常。				UNACCEPT			0.11	0.8		0.45	3.4	43.4		150				1.43	10.8	34.4	346.0	99.5		0.77	5.8	——		10.45	79.2		——	——	——	65	65	4.36	14.2	51.8					13.2
20230420	住院	Patient	男	8天	静脉血	红细胞、白细胞、血小板形态未见异常。				UNACCEPT			0.02	0.3	<0.5		0.15	2.1	44.0		148				2.93	41.2	35.4	336.0	105.3		1.71	24.1	-----		2.29	32.3	-----	-----	-----	35	35	4.18	19.9	78.0			7.1
20230420	住院	Patient	女	13天	静脉血	红细胞、白细胞形态未见异常，光学计数血小板。				UNACCEPT			0.04	0.5			0.38	4.5	34.1		123				3.77	44.4	36.2	361.0	100.3		1.02	12.0	-----		3.28	38.6	-----	-----	-----	33	33	3.40	14.1	51.8			8.5	<0.5
20230421	住院	Patient	女	14天	静脉血	红细胞、白细胞、血小板形态未见异常。				Reflex			0.06	0.7			0.37	4.0	34.9		122				4.67	50.8	35.4	350.0	101.2		0.98	10.6	-----		3.12	33.9	-----	-----	-----	46		3.45	14.3	53.1			9.2	<0.5
20230422	住院	Patient	男	1天	静脉血	已手工分类白细胞,红细胞、血小板形态未见异常.光学计数血小板。白细胞分类绝对值请按照校正白细胞计算。	000030^14^1^1			13.8									55.5		181				5.96	20.0	27.5	326.0	84.5		1.79	6.0	-----		22.05	74.0	-----	-----	-----	120	120	6.57	22.2	58.5			29.8	<0.5
20230423	住院	Patient	男	2天	静脉血	白细胞分类绝对值请按照校正白细胞计算。	000050^100^5^1			8.7									55.7		178				6.60	30.0	27.0	320.0	84.5		1.76	8.0	——		13.64	62.0	——	——	——	117	117	6.59	22.1	58.0			22.0	5.2
20230423	住院	Patient	女	8天	静脉血	红细胞、白细胞、血小板形态未见异常。	000036^44^6^1						0.12	0.7			0.56	3.3	48.0		165				7.61	45.0	34.7	344.0	101.1		2.89	17.1	——		5.73	33.9	——	——	——	120		4.75	14.6	54.7			16.9	<0.5
20230423	住院	Patient	女	16天	静脉血	红细胞、白细胞、血小板形态未见异常。				3R已完成			0.05	0.8			0.45	6.9	34.2		112				3.89	59.8	34.9	327.0	106.5		0.79	12.1	——		1.33	20.4	——	——	——	53	53	3.21	14.4	56.6			6.5	<0.5
20230424	住院	Patient	男	19天	静脉血	已手工分类白细胞,红细胞、血小板形态未见异常.白细胞分类绝对值请按照校正白细胞计算。				17.4			0.41	2.0					44.3		148				2.65	13.0	33.0	334.0	98.9		3.67	18.0	-----		12.04	59.0	-----	-----	-----	121	121	4.48	19.6	69.2			20.4	6.2
20230424	住院	Patient	男	19天	静脉血	红细胞、白细胞、血小板形态未见异常。				ACCEPT			0.13	0.9			0.12	0.8	42.0		146				3.46	24.0	32.4	348.0	93.1		2.36	16.4	-----		8.34	57.9	-----	-----	-----	122	122	4.51	18.9	63.3			14.4	6.2
20230425	住院	Patient	男	4天	静脉血	已手工分类白细胞,红细胞、血小板形态未见异常.				2.0							0.10	1.0	50.7		166				1.66	16.0	26.1	327.0	79.8		1.35	13.0	-----		6.76	65.0	-----	-----	-----	86	86	6.35	21.1	53.1			10.4	2.3
20230426	住院	Patient	女	14天	静脉血	红细胞、白细胞、血小板形态未见异常。				ACCEPT			0.02	0.3			0.13	1.9	29.6		99				4.30	62.3	32.5	334.0	97.0		1.50	21.7	——		0.95	13.8	——	——	——	183		3.05	16.1	57.4			6.9	2.7
20230427	住院	Patient	女	20天	静脉血	红细胞、白细胞、血小板形态未见异常。	000060^87^5^1			3R已完成			0.03	0.3			0.57	5.1	30.2		104				4.27	38.5	35.0	344.0	101.7		1.53	13.8	——		4.70	42.3	——	——	——	46	46	2.97	14.2	53.1			11.1	<0.5
20230427	住院	Patient	男	6天	静脉血	红细胞、白细胞、血小板形态未见异常。	000067^6^3^1						0.10	0.7			0.40	2.9	49.5		157				5.55	39.9	25.8	317.0	81.3		2.11	15.2	-----		5.74	41.3	-----	-----	-----	124		6.09	21.1	55.6			13.9	<0.5
20230430	住院	Patient	女	18天	静脉血	红细胞、白细胞形态未见异常。	000073^109^2^1			ACCEPT			0.02	0.2			0.48	4.0	26.6		88				5.00	41.3	32.5	331.0	98.2		2.90	24.0	——		3.69	30.5	——	——	——	188		2.71	17.1	60.3			12.1	<0.5
20230430	住院	Patient	男	9天	静脉血	已手工分类白细胞,红细胞、血小板形态未见异常.	000034^12^4^1			Smear-Status Success							0.21	2.0	47.6		154				5.46	53.0	26.3	324.0	81.2		1.24	12.0	——		3.40	33.0	——	——	——	198	198	5.86	21.2	56.3			10.3	<0.5
20230430	住院	Patient	女	23天	静脉血	红细胞、白细胞形态未见异常。镜下血小板少见。				UNACCEPT			0.03	0.4			0.35	4.7	32.2		115				4.74	64.1	35.0	357.0	97.9		0.67	9.0	-----		1.61	21.8	-----	-----	-----	50	50	3.29	14.1	50.8			7.4	<0.5
20230504	住院	Patient	女	27天	静脉血	红细胞、白细胞、血小板形态未见异常。				UNACCEPT			0.02	0.3		0.19	3.1	30.4		109				4.11	66.3	34.4	359.0	95.9		0.74	12.0	——		1.13	18.3	——	——	——	40	40	3.17	13.6	48.6				6.2	<0.5
20230505	住院	Patient	男	14天	静脉血	红细胞形态未见异常,白细胞形态未见异常,光学计数PLT.				ACCEPT			0.03	0.4		1.80	22.5	37.7		136				2.30	28.7	28.6	361.0	79.2		0.91	11.4	-----		2.96	37.0	-----	-----	-----	123	123	4.76	29.7	81.0				8.0	<0.5
20230508	住院	Patient	男	17天	静脉血	红细胞、白细胞、血小板形态未见异常。				ACCEPT			0.01	0.1		0.02	0.2	34.4		116				2.22	19.1	28.1	337.0	83.3		2.63	22.7	——		6.72	57.9	——	——	——	286		4.13	28.3	80.8				11.6	<0.5
20230509	住院	Patient	男	12天	静脉血	红细胞、白细胞、血小板形态未见异常。				ACCEPT			0.02	0.4		0.08	1.7	41.6		140				2.11	44.8	38.6	337.0	114.6		1.33	28.3	——		1.17	24.8	——	——	——	155		3.63	19.2	82.3				4.7	<0.5
20230510	住院	Patient	男	19天	静脉血	红细胞、白细胞、血小板形态未见异常。	000001^59^6^1			ACCEPT			0.02	0.2		0.31	2.6	32.8		108				2.42	20.2	28.2	329.0	85.6		1.70	14.2	——		7.54	62.8	——	——	——	297		3.83	28.2	81.1				12.0	<0.5
20230515	住院	Patient	男	24天	静脉血	红细胞、白细胞、血小板形态未见异常。				ACCEPT			0.01	0.2		0.53	9.4	30.1		101				1.65	29.5	27.8	336.0	82.9		1.08	19.2	——		2.34	41.7	——	——	——	198		3.63	28.6	78.2				5.6	<0.5
20230516	住院	Patient	男	12天	静脉血	红细胞、白细胞、血小板形态未见异常。				ACCEPT			0.03	0.4		0.25	3.1	41.2		137				3.38	41.7	30.0	333.0	90.2		1.06	13.1	——		3.38	41.7	——	——	——	179		4.57	-----	-----				8.1	<0.5
20230517	住院	Patient	男	26天	静脉血	红细胞、白细胞、血小板形态未见异常。				3R已完成			0.03	0.3		0.24	2.7	39.2		136				4.92	54.7	29.2	347.0	84.1		0.86	9.6	——		2.94	32.7	——	——	——	60	60	4.66	26.0	76.0				9.0	1.9
20230517	住院	Patient	男	13天	静脉血	红细胞、白细胞、血小板形态未见异常。							0.01	0.1		0.28	3.3	36.8		124				4.66	54.2	29.3	337.0	87.0		1.11	12.9	-----		2.54	29.5	-----	-----	-----	180		4.23	-----	-----				8.6	<0.5
20230518	住院	Patient	男	5天	静脉血	白细胞分类绝对值请按照校正白细胞计算。已手工分类白细胞,红细胞、血小板形态未见异常.				20.0						0.08	1.0	48.6		166				1.82	23.0	37.2	342.0	109.0		1.19	15.0	——		4.82	61.0	——	——	——	139	139	4.46	19.1	75.3				7.9	<0.5
20230518	住院	Patient	男	27天	静脉血	红细胞、白细胞形态未见异常。镜下血小板偶见。				Reflex+Stain-Error			0.02	0.2		0.97	10.3	38.3		136				5.37	57.1	29.5	355.0	83.1		1.55	16.5	——		1.49	15.9	——	——	——	40	40	4.61	26.6	76.5				9.4	4.3
20230519	住院	Patient	男	28天	静脉血	红细胞、白细胞、血小板形态未见异常。	^22^8^1			ACCEPT			0.03	0.2		0.50	3.9	38.1		138				8.88	69.9	33.3	362.0	91.8		1.14	9.0	——		2.16	17.0	——	——	——	147		4.15	13.9	47.2				12.7	<0.5
20230519	住院	Patient	男	28天	静脉血	红细胞、白细胞、血小板形态未见异常。				3R已完成			0.03	0.4		0.85	10.0	35.0		121				4.39	51.7	30.0	346.0	86.8		1.25	14.7	——		1.97	23.2	——	——	——	50	50	4.03	26.5	80.9				8.5	2.1
20230522	住院	Patient	男	18天	静脉血	红细胞、白细胞、血小板形态未见异常。				ACCEPT			0.02	0.2		0.08	1.0	32.5		108				3.54	42.6	29.4	332.0	88.6		1.38	16.6	——		3.29	39.6	——	——	——	177		3.67	-----	-----				8.3	<0.5
20230523	住院	Patient	女	5天	静脉血	红细胞、白细胞、血小板形态未见异常。	000096^94^1^1			UNACCEPT			0.02	0.5		0.46	10.2	42.8		143				2.67	59.3	37.5	334.0	112.3		0.38	8.4	——		0.97	21.6	——	——	——	31	31	3.81	19.9	83.9				4.5	<0.5
20230523	住院	Patient	男	1月2天	静脉血	红细胞、白细胞、血小板形态未见异常。	000097^52^6^1			ACCEPT			0.02	0.2		0.43	5.3	41.0		137				3.83	47.3	29.3	334.0	87.8		1.00	12.3	——		2.83	34.9	——	——	——	102		4.67	23.8	73.8				8.1	<0.5
20230525	住院	Patient	男	7天	静脉血	红细胞、白细胞、血小板形态未见异常。	000075^79^4^1			ACCEPT			0.07	0.7		0.33	3.1	50.2		175				2.85	27.1	36.3	349.0	104.1		2.76	26.3	——		4.49	42.8	——	——	——	77	77	4.82	18.6	71.6				10.5	3.4
20230525	住院	Patient	男	1月1天	静脉血	红细胞、白细胞、血小板形态未见异常。				ACCEPT			0.06	0.6		0.24	2.4	34.1		122				4.41	43.7	30.8	358.0	86.1		3.59	35.5	——		1.80	17.8	——	——	——	301		3.96	19.9	52.8				10.1	1.2
20230526	住院	Patient	男	7天	静脉血	红细胞、白细胞、血小板形态未见异常。				ACCEPT			0.01	0.2		0.20	3.8	44.8		155				2.29	43.3	38.4	346.0	110.9		1.01	19.1	——		1.78	33.6	——	——	——	171		4.04	17.2	71.0				5.3	<0.5
20230529	住院	Patient	男	11天	静脉血	红细胞形态未见异常,白细胞形态未见异常,光学计数PLT.	000014^11^1^1			ACCEPT			0.11	0.8		0.64	4.6	50.5		173				5.32	38.0	35.7	343.0	104.1		1.64	11.7	——		6.29	44.9	——	——	——	112	112	4.85	17.4	67.3				14.0	<0.5
20230529	住院	Patient	男	9天	静脉血	红细胞形态未见异常,白细胞形态未见异常,光学计数PLT.				ACCEPT			0.05	0.5		0.37	3.5	46.2		139				3.55	33.5	25.9	301.0	86.0		1.63	15.4	-----		4.99	47.1	-----	-----	-----	66	66	5.37	27.9	83.4				10.6	7.8
20230530	住院	Patient	男	10天	静脉血	红细胞、白细胞、血小板形态未见异常。	000008^82^5^1			ACCEPT			0.06	0.5		0.05	0.4	45.7		138				3.46	28.8	26.3	302.0	87.2		1.62	13.5	-----		6.82	56.8	-----	-----	-----	83	83	5.24	27.4	84.4				12.0	3.9
20230531	住院	Patient	女	1天	静脉血	红细胞、白细胞、血小板形态未见异常。血小板少见。	000096^115^5^1			3R已完成			0.14	0.7		0.22	1.1	38.9		140				3.14	15.8	34.7	360.0	96.5		1.49	7.5	——		14.91	74.9	——	——	——	32	32	4.03	16.6	57.0				19.9	<0.5
20230501	其他	Patient	男	1天	静脉血	凝块,已退.	000026^109^4^1			Review			0.05	0.4		0.08	0.6	48.9		175				2.80	21.2	37.0	358.0	103.4		1.21	9.2	——		9.06	68.6	——	——	——	46		4.73	17.5	65.4				13.2	<0.5
20230520	其他	Patient	男	14天	静脉血	凝块100553	000084^23^1^1			UNACCEPT			0.02	0.3		0.10	1.4	36.1		125				4.92	69.3	34.0	346.0	98.1		0.66	9.3	——		1.40	19.7	——	——	——	3	3	3.68	14.2	51.5				7.1	<0.5
20230501	住院	Patient	男	10天	静脉血	已手工分类白细胞,血小板形态未见异常.镜下可见红细胞聚集，且孵育无法纠正，建议临床根据血红蛋白判断患者贫血或失血情况。请结合临床。				9.1						0.20	2.0	24.5		98				4.18	41.0	41.4	400.0	103.4		0.92	9.0	-----		4.90	48.0	-----	-----	-----	148		2.37	25.3	91.1				10.2	<0.5
20230501	住院	Patient	男	10天	静脉血	已手工分类白细胞,红细胞、血小板形态未见异常.白细胞分类绝对值请按照校正白细胞计算。				Stain-Status Success						0.44	4.0	23.2		83				2.89	26.0	35.8	358.0	100.0		0.78	7.0	——		6.99	63.0	——	——	——	162		2.32	23.9	84.0				11.1	<0.5
20230502	住院	Patient	男	11天	静脉血	已手工分类白细胞,红细胞、血小板形态未见异常.				0.12						0.50	4.0	33.9		121				8.31	67.0	33.8	357.0	94.7		0.87	7.0	——		2.60	21.0	——	——	——	160		3.58	24.2	77.4				12.4	<0.5
20230503	住院	Patient	男	6天	静脉血	红细胞形态未见异常,白细胞形态未见异常,光学计数PLT.							0.01	0.2		0.15	2.7	44.1		158				2.06	36.8	40.5	358.0	113.1		1.32	23.6	-----		2.06	36.7	-----	-----	-----	129	129	3.90	19.2	80.7				5.6	<0.5
20230504	住院	Patient	男	7天	静脉血	红细胞、白细胞、血小板形态未见异常。				ACCEPT			0.02	0.3		0.16	2.1	44.4		158				3.13	40.6	41.7	356.0	117.2		1.49	19.3	——		2.90	37.7	——	——	——	146		3.79	19.2	84.3				7.7	0.5
20230516	住院	Patient	男	25天	静脉血	红细胞、白细胞、血小板形态未见异常。				3R已完成			0.05	0.6		0.04	0.5	43.0		149				2.01	23.4	29.7	347.0	85.8		1.17	13.6	——		5.32	61.9	——	——	——	66	74	5.01	25.2	73.7				8.6	2.8
20230517	住院	Patient	男	4天	静脉血	已手工分类白细胞,红细胞、血小板形态未见异常.白细胞分类绝对值请按照校正白细胞计算。	000001^42^3^1			1.0						0.42	5.0	52.5		173				2.18	26.0	36.7	330.0	111.2		1.26	15.0	——		4.45	53.0	——	——	——	127	127	4.72	18.8	78.0				8.4	0.6
20230520	住院	Patient	男	14天	静脉血	红细胞、白细胞、血小板形态未见异常。	000338^21^5^1			ACCEPT			0.05	0.4		0.63	5.6	38.5		132				5.75	50.9	25.6	343.0	74.8		1.50	13.3	——		3.37	29.8	——	——	——	396	396	5.15	16.2	42.0				11.3	<0.5
20230520	住院	Patient	女	2天	静脉血	红细胞、白细胞、血小板形态未见异常。		手工复查		Reflex			0.04	0.5		0.61	7.3	45.9		161				2.85	33.9	37.7	351.0	107.5		0.73	8.7	——		4.17	49.6	——	——	——	35	35	4.27	22.5	86.0				8.4	<0.5
20230521	住院	Patient	男	1月0天	静脉血	已手工分类白细胞,红细胞形态未见异常.镜下查见大血小板。	000062^53^6^1			0.09						0.67	7.0	32.8		111				3.80	40.0	29.7	338.0	87.7		0.86	9.0	——		3.99	42.0	——	——	——	101	101	3.74	27.6	84.7				9.5	<0.5
20230521	住院	Patient	女	3天	静脉血	镜下血小板少见。	000082^59^4^1			3R已完成+Stain-Status Success			0.02	0.3		0.57	8.6	42.2		140				2.92	44.2	37.2	332.0	112.2		0.64	9.7	——		2.46	37.2	——	——	——	33	33	3.76	21.9	89.2				6.6	<0.5
20230521	住院	Patient	男	3天	静脉血	红细胞、白细胞、血小板形态未见异常。				ACCEPT			0.11	0.8		0.70	4.9	51.2		184				2.68	18.9	36.7	359.0	102.2		1.73	12.2	——		8.97	63.2	——	——	——	77	77	5.01	18.2	67.0				14.2	7.9
20230522	住院	Patient	男	4天	静脉血	红细胞、白细胞、血小板形态未见异常。	000351^95^5^1			ACCEPT			0.05	0.3		0.85	5.6	51.4		179				4.27	28.1	36.7	348.0	105.3		2.51	16.5	——		7.52	49.5	——	——	——	121		4.88	19.1	72.5				15.2	5.0
20230525	住院	Patient	女	1天	静脉血	红细胞、白细胞、血小板形态未见异常。	000075^49^4^1						0.03	0.3		0.16	1.5	47.6		150				3.88	36.3	28.6	315.0	90.8		0.91	8.5	-----		5.71	53.4	-----	-----	-----	103		5.24	18.1	56.8				10.7	<0.5
20230526	住院	Patient	男	1月5天	静脉血	红细胞、白细胞、血小板形态未见异常。	000016^17^4^1			ACCEPT			0.02	0.2		0.01	0.1	40.7		133				4.71	44.0	28.9	327.0	88.5		1.65	15.4	——		4.31	40.3	——	——	——	173		4.60	22.8	73.0				10.7	<0.5
20230529	住院	Patient	男	1月8天	末梢血	红细胞、白细胞、血小板形态未见异常。				ACCEPT			0.01	0.1		0.08	0.7	38.5		131				7.75	64.6	29.5	340.0	86.7		1.62	13.5	——		2.53	21.1	——	——	——	184	184	4.44	21.4	67.9				12.0	<0.5
20230531	住院	Patient	男	13天	静脉血	红细胞、白细胞、血小板形态未见异常。				UNACCEPT			0.05	0.3		0.87	5.6	49.2		178				6.66	43.0	35.5	362.0	98.0		1.38	8.9	-----		6.54	42.2	-----	-----	-----	138	138	5.02	16.8	60.0				15.5	<0.5
20230531	住院	Patient	女	13天	静脉血	红细胞、白细胞、血小板形态未见异常。				ACCEPT			0.01	0.2		0.14	2.6	35.4		119				1.77	34.1	35.7	336.0	106.3		0.87	16.7	——		2.41	46.4	——	——	——	84	84	3.33	18.2	71.6				5.2	7.0
20230601	住院	Patient	男	12天	静脉血	红细胞、白细胞、血小板形态未见异常。	000069^90^6^1			ACCEPT			0.04	0.4		0.26	2.7	42.1		129				4.59	46.8	26.1	306.0	85.2		1.29	13.2	——		3.62	36.9	——	——	——	133	133	4.94	26.5	79.7				9.8	2.3
20230601	住院	Patient	女	2天	静脉血	挑				Reflex			0.10	0.8		0.39	3.0	38.8		140				2.45	19.0	34.5	361.0	95.6		0.99	7.7	——		8.97	69.5	——	——	——	37		4.06	15.9	55.6				12.9	<0.5
20230601	住院	Patient	女	14天	静脉血	红细胞、白细胞、血小板形态未见异常。				ACCEPT			0.01	0.2		0.22	4.2	34.8		117				2.17	41.7	35.5	336.0	105.5		0.59	11.4	——		2.21	42.5	——	——	——	126		3.30	18.3	71.5				5.2	7.8
20230601	住院	Patient	男	1月7天	静脉血	红细胞、白细胞、血小板形态未见异常。				ACCEPT			0.03	0.3		0.40	3.7	29.0		100				3.88	35.9	30.5	345.0	88.4		2.86	26.5	——		3.63	33.6	——	——	——	380		3.28	22.3	64.2				10.8	<0.5
20230602	住院	Patient	女	15天	静脉血	红细胞、白细胞、血小板形态未见异常。				ACCEPT			0.01	0.2		0.24	4.5	29.2		100				2.64	48.9	35.7	342.0	104.3		0.40	7.4	——		2.11	39.0	——	——	——	96	96	2.80	18.4	70.4				5.4	2.2
20230603	住院	Patient	男	14天	静脉血	红细胞、白细胞、血小板形态未见异常。	000075^67^4^1			ACCEPT			0.03	0.3		0.13	1.3	39.4		122				4.75	46.1	25.4	310.0	81.9		1.34	13.0	——		4.05	39.3	——	——	——	300		4.81	26.4	73.2				10.3	1.9
20230603	住院	Patient	女	17天	静脉血	红细胞、白细胞、血小板形态未见异常。				ACCEPT			0.02	0.3		0.04	0.5	35.4		122				3.81	51.5	33.8	345.0	98.1		1.12	15.2	-----		2.41	32.5	-----	-----	-----	132	132	3.61	17.9	62.5				7.4	4.2
20230605	住院	Patient	男	14天	静脉血	红细胞、白细胞、血小板形态未见异常。	000068^76^1^1						0.04	0.4		0.53	5.4	41.2		134				4.56	46.1	25.7	325.0	78.9		1.30	13.1	-----		3.47	35.0	-----	-----	-----	414		5.22	16.7	45.4				9.9	<0.5
20230605	住院	Patient	男	14天	静脉血	红细胞、白细胞、血小板形态未见异常。				ACCEPT			0.02	0.3		0.15	2.2	43.5		155				2.60	38.2	38.4	356.0	107.7		1.17	17.2	——		2.86	42.1	——	——	——	106		4.04	15.9	62.5				6.8	<0.5
20230607	住院	Patient	女	8天	静脉血	红细胞、白细胞、血小板形态未见异常。	000093^58^5^1			ACCEPT			0.08	0.8		0.25	2.5	36.3		132				5.18	52.3	33.6	364.0	92.4		1.26	12.7	——		3.14	31.7	——	——	——	78		3.93	14.5	49.0				9.9	<0.5
20230607	住院	Patient	男	20天	静脉血	红细胞、白细胞、血小板形态未见异常。				UNACCEPT			0.06	0.5		0.61	4.7	44.9		157				6.63	51.4	34.6	350.0	98.9		1.25	9.7	——		4.35	33.7	——	——	——	214		4.54	17.5	63.9				12.9	1.7
20230608	住院	Patient	女	7天	静脉血	红细胞、白细胞、血小板形态未见异常。				ACCEPT			0.01	0.2		0.40	7.8	37.3		128				2.90	56.8	31.8	343.0	92.8		1.43	28.1	——		0.36	7.1	——	——	——	310		4.02	18.0	58.1				5.1	<0.5
20230609	住院	Patient	男	1月16天	静脉血	红细胞、白细胞、血小板形态未见异常。				ACCEPT			0.05	0.6		0.56	6.2	29.9		97				4.18	45.9	29.9	324.0	92.3		1.97	21.7	——		2.33	25.6	——	——	——	356		3.24	22.3	72.0				9.1	<0.5
20230612	住院	Patient	女	19天	静脉血	红细胞、白细胞、血小板形态未见异常。	000060^80^3^1						0.04	0.3		0.51	4.4	37.6		120				5.98	51.1	27.3	319.0	85.5		1.24	10.6	-----		3.93	33.6	-----	-----	-----	185	185	4.40	17.4	54.4				11.7	<0.5
20230612	住院	Patient	男	23天	静脉血	红细胞、白细胞、血小板形态未见异常。	000068^28^4^1			ACCEPT			0.03	0.3		1.00	8.6	29.7		90				5.75	49.6	24.2	303.0	79.8		1.43	12.3	——		3.39	29.2	——	——	——	449		3.72	28.3	75.4				11.6	<0.5
20230613	住院	Patient	女	12天	静脉血	红细胞、白细胞、血小板形态未见异常。				ACCEPT			0.02	0.3		0.04	0.6	38.3		125				2.92	41.7	30.4	326.0	93.2		1.48	21.1	——		2.54	36.3	——	——	——	350		4.11	19.7	61.4				7.0	<0.5
20230615	住院	Patient	女	28天	静脉血	红细胞、白细胞、血小板形态未见异常。	000063^32^3^1			ACCEPT			0.01	0.2		0.23	3.6	27.7		89				3.86	59.4	33.5	321.0	104.1		0.60	9.3	——		1.79	27.5	——	——	——	118		2.66	19.0	70.5				6.5	1.4
20230615	住院	Patient	女	7天	静脉血	红细胞、白细胞、血小板形态未见异常。	000069^109^1^1			ACCEPT			0.04	0.5		0.19	2.5	47.3		159				3.50	45.5	37.8	336.0	112.4		1.87	24.3	——		2.09	27.2	——	——	——	223		4.21	19.0	76.8				7.7	<0.5
20230615	住院	Patient	男	26天	静脉血	红细胞、白细胞、血小板形态未见异常。				ACCEPT			0.08	0.5		1.64	10.6	28.4		84				6.28	40.5	23.9	296.0	80.9		1.78	11.5	——		5.72	36.9	——	——	——	409		3.51	27.7	78.5				15.5	1.7
20230619	住院	Patient	女	3天	静脉血	红细胞、白细胞、血小板形态未见异常。				Pending			0.02	0.4		0.08	1.5	42.4		140				0.90	17.3	34.2	330.0	103.7		0.61	11.8	——		3.59	69.0	——	——	——	131		4.09	16.4	62.2				5.2	<0.5
20230621	住院	Patient	男	13天	静脉血	红细胞、白细胞、血小板形态未见异常。							0.07	0.6		0.92	8.1	41.3		144				5.49	48.6	38.6	349.0	110.7		1.76	15.6	-----		3.06	27.1	-----	-----	-----	145		3.73	16.3	66.2				11.3	<0.5
20230621	住院	Patient	女	5天	静脉血	红细胞、白细胞、血小板形态未见异常。				ACCEPT			0.01	0.2		0.35	7.7	42.5		146				0.67	14.8	33.3	344.0	97.0		0.87	19.4	——		2.61	57.9	——	——	——	139	139	4.38	16.2	56.9				4.5	<0.5
20230625	住院	Patient	女	9天	末梢血	红细胞、白细胞、血小板形态未见异常。				ACCEPT			0.02	0.3		0.16	2.4	35.3		129				1.25	18.9	32.6	365.0	89.1		1.93	29.2	——		3.25	49.2	——	——	——	234		3.96	17.4	53.6				6.6	<0.5
20230628	住院	Patient	女	12天	静脉血	红细胞、白细胞、血小板形态未见异常。	000348^41^4^1			ACCEPT			0.04	0.4		0.02	0.2	34.6		114				0.80	8.0	32.9	329.0	100.0		1.72	17.2	——		7.42	74.2	——	——	——	228	228	3.46	19.6	66.8				10.0	<0.5
20230629	住院	Patient	女	13天	静脉血	红细胞、白细胞、血小板形态未见异常。				ACCEPT			0.01	0.1		0.01	0.1	29.6		101				0.79	5.8	33.2	341.0	97.4		2.12	15.5	——		10.75	78.5	——	——	——	210		3.04	19.1	63.5				13.7	<0.5
20230629	住院	Patient	男	19天	静脉血	红细胞、白细胞、血小板形态未见异常。				ACCEPT			0.03	0.2		0.46	3.5	28.6		100				3.68	28.3	33.8	350.0	96.6		2.13	16.4	——		6.71	51.6	——	——	——	149		2.96	16.7	58.9				13.0	<0.5
20230630	住院	Patient	男	20天	静脉血	红细胞、白细胞、血小板形态未见异常。				ACCEPT			0.06	0.4		0.55	4.0	41.7		144				3.59	26.0	31.4	345.0	91.0		2.35	17.0	——		7.26	52.6	——	——	——	147		4.58	19.8	64.6				13.8	<0.5
20230604	住院	Patient	女	3天	静脉血	已手工分类白细胞,红细胞、血小板形态未见异常.白细胞分类绝对值请按照校正白细胞计算。				0.8						0.22	5.0	47.7		153				2.84	63.0	31.1	321.0	97.0		0.68	15.0	——		0.76	17.0	——	——	——	183		4.92	17.0	58.8				4.5	<0.5
20230605	住院	Patient	女	6天	静脉血	红细胞、白细胞、血小板形态未见异常。	000043^57^2^1						0.08	0.8		0.46	4.6	37.8		134				4.43	44.3	34.0	354.0	95.9		1.23	12.3	-----		3.80	38.0	-----	-----	-----	76		3.94	14.6	50.9				10.0	<0.5
20230605	住院	Patient	女	4天	静脉血	已手工分类白细胞,红细胞、血小板形态未见异常.白细胞分类绝对值请按照校正白细胞计算。				1.3	0.05	1.0				0.32	6.0	43.9		147				4.43	82.0	31.7	335.0	94.6		0.32	6.0	-----		0.27	5.0	-----	-----	-----	205		4.64	17.0	57.1				5.4	0.8
20230606	住院	Patient	男	1天	末梢血	手工分类白细胞,红细胞形态未见异常,白细胞分类绝对值请按照校正白细胞计算。				10.3						0.27	2.0	62.2		206				6.53	48.0	38.9	331.0	117.4		0.27	2.0	-----		6.53	48.0	-----	-----	-----	116		5.30	18.6	78.3				13.6	<0.5
20230629	住院	Patient	女	13天	静脉血	红细胞、白细胞、血小板形态未见异常。				ACCEPT			0.02	0.2		0.04	0.3	31.6		106				0.89	7.2	33.3	335.0	99.4		1.92	15.6	——		9.43	76.7	——	——	——	203	203	3.18	19.3	66.9				12.3	<0.5
20230703	住院	Patient	男	23天	静脉血	红细胞、白细胞、血小板形态未见异常。				ACCEPT			0.02	0.2		0.60	5.1	36.1		120				4.02	34.4	31.9	332.0	96.0		2.27	19.4	——		4.79	40.9	——	——	——	156		3.76	18.2	63.7				11.7	<0.5
20230703	住院	Patient	女	17天	静脉血	红细胞、白细胞、血小板形态未见异常。				ACCEPT			0.03	0.3		0.30	2.8	42.3		146				2.17	20.1	32.1	345.0	93.0		1.67	15.5	——		6.62	61.3	——	——	——	146	146	4.55	16.8	56.7				10.8	<0.5
20230704	住院	Patient	女	1月16天	静脉血	红细胞、白细胞、血小板形态未见异常。	^25^7^1			ACCEPT			0.00	0.0		0.13	2.7	31.1		102				3.10	63.2	31.7	328.0	96.6		0.43	8.8	——		1.24	25.3	——	——	——	155		3.22	17.5	62.1				4.9	1.2
20230705	住院	Patient	男	4天	静脉血	红细胞、白细胞、血小板形态未见异常。				ACCEPT			0.02	0.2		0.28	3.0	59.5		205				1.63	17.7	37.3	345.0	108.4		1.76	19.1	——		5.52	60.0	——	——	——	148		5.49	23.5	93.7				9.2	<0.5
20230707	住院	Patient	男	15天	静脉血	脂血样本，该结果为血浆置换后结果。				0.11						2.63	25.0	25.6		96				1.68	16.0	34.4	375.0	91.8		1.37	13.0	——		4.73	45.0	——	——	——	192		2.79	19.7	59.7				10.5	<0.5
20230708	住院	Patient	男	16天	静脉血	脂血，该结果为血浆置换后检测结果，请结合临床。红细胞、白细胞、血小板形态未见异常。	000351^85^3^1			ACCEPT			0.02	0.2		3.60	32.4	30.0		114				2.24	20.2	33.8	380.0	89.0		1.21	10.9	——		4.03	36.3	——	——	——	143		3.37	15.4	48.0				11.1	<0.5
20230710	住院	Patient	男	3天	静脉血	外周成熟RBC大小不等,以中小为主,部分中空淡染区扩大，镜下可见不规则异形RBC。				ACCEPT			0.02	0.2		0.28	3.0	52.4		178				2.65	28.5	28.3	340.0	83.2		1.95	21.0	——		4.40	47.3	——	——	——	181		6.30	18.8	50.4				9.3	0.6
20230712	住院	Patient	女	9天	末梢血	外周成熟RBC大小不等,以中小为主,部分中空淡染区扩大，镜下可见不规则异形RBC。				ACCEPT			0.01	0.1		0.08	0.6	38.9		136				3.33	24.7	26.4	350.0	75.4		2.36	17.5	——		7.71	57.1	——	——	——	99		5.16	24.2	63.2				13.5	7.0
20230713	住院	Patient	女	8天	末梢血	红细胞、白细胞、血小板形态未见异常。				ACCEPT			0.02	0.2		0.30	3.1	46.3		153				4.51	46.0	34.4	330.0	104.0		1.83	18.7	——		3.14	32.0	——	——	——	116		4.45	16.2	61.9				9.8	<0.5
20230717	住院	Patient	男	25天	静脉血	红细胞、白细胞、血小板形态未见异常。	000034^54^6^1			3R已完成			0.03	0.3		1.31	14.7	23.6		86				2.09	23.5	32.5	364.0	89.1		1.27	14.3	——		4.20	47.2	——	——	——	88	88	2.65	17.1	52.6				8.9	<0.5
20230718	住院	Patient	男	26天	静脉血	红细胞、白细胞、血小板形态未见异常。				UNACCEPT			0.02	0.3		1.07	14.6	35.8		132				1.55	21.3	31.6	369.0	85.6		0.92	12.6	——		3.74	51.2	——	——	——	59	59	4.18	16.2	49.4				7.3	<0.5
20230719	住院	Patient	男	27天	静脉血	红细胞、白细胞、血小板形态未见异常。				3R已完成			0.01	0.1		1.22	17.7	34.5		125				1.12	16.3	31.6	362.0	87.1		0.55	7.9	——		4.00	58.0	——	——	——	39	39	3.96	16.7	51.8				6.9	<0.5
20230720	住院	Patient	男	28天	静脉血	红细胞、白细胞、血小板形态未见异常。				UNACCEPT			0.05	0.5		1.40	15.0	33.8		119				1.19	12.8	31.5	352.0	89.4		1.27	13.7	——		5.39	58.0	——	——	——	52	52	3.78	17.3	55.7				9.3	<0.5
20230721	住院	Patient	男	7天	静脉血	红细胞、白细胞、血小板形态未见异常。				ACCEPT			0.04	0.3		0.56	4.7	51.2		180				3.64	30.3	35.9	352.0	102.0		1.82	15.2	——		5.94	49.5	——	——	——	226		5.02	17.3	64.9				12.0	<0.5
20230721	住院	Patient	男	29天	静脉血	红细胞、白细胞、血小板形态未见异常。				3R已完成			0.02	0.3		1.33	19.8	28.8		104				0.96	14.4	32.0	361.0	88.6		0.75	11.2	——		3.64	54.3	——	——	——	49	49	3.25	17.2	54.4				6.7	<0.5
20230723	住院	Patient	男	1月1天	静脉血	红细胞、白细胞、血小板形态未见异常。				ACCEPT			0.01	0.1		0.25	1.9	29.2		105				1.20	9.3	30.9	360.0	85.9		1.19	9.2	——		10.26	79.5	——	——	——	70	70	3.40	16.7	50.8				12.9	<0.5
20230724	住院	Patient	女	3天	静脉血	红细胞、白细胞形态未见异常。镜下血小板偶见.	^44^7^1			3R已完成			0.03	0.4		0.49	5.8	54.5		194				2.48	29.5	43.4	356.0	121.9		1.25	14.9	——		4.15	49.4	——	——	——	31	31	4.47	20.2	93.2				8.4	<0.5
20230724	住院	Patient	男	1月2天	静脉血	红细胞、白细胞、血小板形态未见异常。				Reflex			0.01	0.1		0.10	1.1	20.0		77				1.26	13.9	33.8	385.0	87.7		1.00	11.0	——		6.72	73.9	——	——	——	44	44	2.28	16.6	52.4				9.1	<0.5
20230724	住院	Patient	男	9天	静脉血	红细胞、白细胞、血小板形态未见异常。				ACCEPT			0.04	0.3		1.08	9.0	55.6		196				4.12	34.3	38.0	353.0	107.8		1.45	12.1	——		5.32	44.3	——	——	——	126		5.16	16.7	67.6				12.0	<0.5
20230725	住院	Patient	女	4天	静脉血	红细胞、白细胞、血小板形态未见异常。	000014^33^4^1			UNACCEPT			0.02	0.2		0.60	7.1	52.4		195				2.69	31.7	43.2	372.0	116.2		1.34	15.8	——		3.84	45.2	——	——	——	32	32	4.51	19.5	84.2				8.5	<0.5
20230725	住院	Patient	男	1月3天	静脉血	红细胞、白细胞、血小板形态未见异常。				ACCEPT			0.01	0.1		0.06	0.7	38.6		137				2.35	28.0	30.4	355.0	85.6		1.19	14.2	——		4.79	57.0	——	——	——	81	81	4.51	17.8	53.3				8.4	<0.5
20230727	住院	Patient	女	1月26天	静脉血	外周成熟RBC大小不等,以中小为主,部分中空淡染区扩大，镜下可见不规则异形RBC。白细胞、血小板形态未见异常。	000045^54^6^1			ACCEPT			0.02	0.3		0.99	14.2	23.2		75				3.21	45.9	24.1	323.0	74.6		0.78	11.1	——		2.00	28.5	——	——	——	448		3.11	20.5	52.1				7.0	<0.5
20230727	住院	Patient	女	6天	静脉血	已手工分类白细胞,红细胞、血小板形态未见异常.	000045^53^6^1			5.0						0.19	2.0	48.5		172				1.81	19.0	41.8	355.0	118.0		1.24	13.0	——		5.61	59.0	——	——	——	52	52	4.11	18.9	83.3				9.5	1.6
20230727	住院	Patient	男	1月5天	静脉血	红细胞、白细胞、血小板形态未见异常。				ACCEPT			0.00	0.0		0.13	2.0	37.7		134				1.64	25.3	30.4	355.0	85.5		1.03	15.8	——		3.70	56.9	——	——	——	116	116	4.41	18.3	53.8				6.5	<0.5
20230728	住院	Patient	女	1月27天	静脉血	红细胞、白细胞、血小板形态未见异常。	000090^19^5^1			ACCEPT			0.04	0.6		0.58	8.3	34.7		121				3.52	50.3	27.4	349.0	78.5		0.65	9.3	——		2.21	31.5	——	——	——	395		4.42	20.8	57.6				7.0	<0.5
20230728	住院	Patient	女	2天	静脉血	红细胞、白细胞、血小板形态未见异常。				ACCEPT			0.05	0.4		0.69	5.5	61.9		217				4.25	34.0	38.0	351.0	108.4		1.38	11.0	——		6.14	49.1	——	——	——	107		5.71	19.3	73.0				12.5	<0.5
20230731	住院	Patient	女	10天	静脉血	红细胞、白细胞、血小板形态未见异常。	000024^66^6^1			ACCEPT			0.03	0.4		0.43	5.3	46.6		169				3.14	38.8	41.4	363.0	114.2		1.06	13.1	——		3.43	42.4	——	——	——	95	95	4.08	18.0	76.3				8.1	0.6
20230707	住院	Patient	男	15天	静脉血					ACCEPT			0.02	0.2		3.07	29.8	25.6		96				1.27	12.3	34.4	375.0	91.8		1.25	12.1	——		4.70	45.6	——	——	——	192	192	2.79	19.7	59.7				10.3
20230705	住院	Patient	女	19天	静脉血	红细胞、白细胞、血小板形态未见异常。				ACCEPT			0.02	0.2		0.42	3.9	38.9		130				3.38	31.3	31.8	334.0	95.1		1.40	13.0	——		5.57	51.6	——	——	——	145		4.09	16.8	58.1				10.8	<0.5
20230708	住院	Patient	女	22天	静脉血	红细胞、白细胞、血小板形态未见异常。	000093^9^6^1			ACCEPT			0.06	0.3		0.45	2.2	41.4		139				3.75	18.3	32.3	336.0	96.1		2.58	12.6	——		13.65	66.6	——	——	——	211	211	4.31	16.9	58.6				20.5	<0.5
20230708	住院	Patient	女	7天	静脉血	该标本严重脂血，结果为血浆置换后结果，请结合临床，建议复查。已手工分类白细胞,红细胞形态未见异常.镜下血小板少见.白细胞分类绝对值请按照校正白细胞计算。	000353^36^2^2			2.0						0.36	3.0	31.8		113				0.97	8.0	32.2	355.0	90.6		1.82	15.0	——		8.35	69.0	——	——	——	67	67	3.51	19.2	59.8				12.1	<0.5
20230709	住院	Patient	男	2天	静脉血	红细胞、白细胞、血小板形态未见异常。	000037^19^6^1			ACCEPT			0.03	0.4		0.18	2.4	49.1		168				1.80	24.3	28.2	342.0	82.5		1.18	15.9	——		4.22	57.0	——	——	——	213		5.95	18.8	50.2				7.4	1.7
20230710	住院	Patient	男	8天	静脉血	已手工分类白细胞,红细胞、血小板形态未见异常.标本重度脂血，且孵育无法纠正，该结果为血浆置换后检测结果，请结合临床。	000086^53^6^1			UNACCEPT								44.3		179				0.44	4.0	36.3	404.0	89.9		1.11	10.0	——		8.55	77.0	——	——	——	110		4.66	18.2	55.5				11.1	<0.5
20230721	住院	Patient	女	1天	静脉血	已手工分类白细胞,红细胞、血小板形态未见异常,光学计数血小板,镜下血小板少见.白细胞分类绝对值请按照校正白细胞计算.	000021^118^3^1	手工复查		4.5								61.5		215				3.63	21.0	42.5	350.0	121.5		2.08	12.0	——		11.59	67.0	——	——	——	41	41	5.06	20.9	93.9				17.3	<0.5
20230722	住院	Patient	女	1天	静脉血	红细胞形态未见异常,白细胞形态未见异常,光学计数PLT.	000042^42^5^1			Reflex			0.06	0.5		0.17	1.4	59.2		210				4.74	37.9	43.1	355.0	121.6		1.44	11.5	——		6.09	48.7	——	——	——	40	40	4.87	21.5	95.0				12.5	1.6
20230722	住院	Patient	男	1月0天	静脉血	红细胞、白细胞、血小板形态未见异常。				Reflex			0.02	0.2		0.18	2.0	30.8		113				0.84	9.4	31.6	367.0	86.0		0.44	5.0	——		7.42	83.4	——	——	——	45		3.58	16.4	49.9				8.9	<0.5
20230723	住院	Patient	女	2天	静脉血	红细胞形态未见异常,白细胞形态未见异常,光学计数PLT.	000085^68^3^1			3R已完成			0.07	0.6		0.25	2.1	62.7		219				5.22	44.2	43.0	349.0	123.2		1.45	12.3	——		4.81	40.8	——	——	——	28	28	5.09	21.2	95.8				11.8	<0.5
20230724	住院	Patient	男	6天	末梢血	红细胞、白细胞、血小板形态未见异常。				ACCEPT			0.01	0.1		0.61	7.1	45.1		157				1.48	17.2	35.4	348.0	101.8		1.61	18.7	——		4.89	56.9	——	——	——	153		4.43	15.8	58.2				8.6	<0.5
20230724	住院	Patient	女	1月8天	静脉血	红细胞、白细胞、血小板形态未见异常。				ACCEPT			0.02	0.1		1.06	5.2	28.4		93				6.01	29.6	31.1	327.0	95.0		2.33	11.5	——		10.88	53.6	——	——	——	211		2.99	18.0	59.9				20.3	<0.5
20230801	住院	Patient	男	1天	静脉血	已手工分类白细胞,红细胞、血小板形态未见异常.	000351^20^5^1			ACCEPT							0.20	2.0	60.5		199				1.94	19.0	34.9	329.0	106.1		0.92	9.0	——		6.94	68.0	——		——	——	114	114	5.70	20.3	69.8				10.2
20230801	住院	Patient	女	13天	静脉血	红细胞、白细胞、血小板形态未见异常。				ACCEPT			0.03	0.4			0.15	1.9	31.3		115				3.28	42.1	40.2	367.0	109.4		1.44	18.5	——		2.89	37.1	——		——	——	250		2.86	15.9	62.7				7.8
20230802	住院	Patient	男	1月14天	静脉血	红细胞、白细胞、血小板形态未见异常。				3R已完成			0.07	0.5			0.59	4.5	28.0		91				7.23	55.6	29.9	325.0	92.1		2.50	19.2	——		2.63	20.2	——		——	——	15	15	3.04	15.7	50.9				13.0
20230803	住院	Patient	男	1天	静脉血	已手工分类白细胞,红细胞、血小板形态未见异常.				Stain-Status Success			0.07	1.0			0.14	2.0	55.2		198				2.97	43.0	39.9	359.0	111.3		0.55	8.0	——		3.11	45.0	——		——	——	104		4.96	21.0	76.6				6.9
20230803	住院	Patient	女	13天	静脉血	红细胞、白细胞、血小板形态未见异常。				ACCEPT			0.02	0.2			0.44	4.1	47.4		170				5.09	47.1	41.4	359.0	115.3		1.08	10.0	——		4.17	38.6	——		——	——	150		4.11	18.3	78.8				10.8
20230804	住院	Patient	男	4天	静脉血	红细胞形态未见异常,白细胞形态未见异常,光学计数PLT.	000090^27^1^1			UNACCEPT			0.01	0.2			0.04	0.9	44.8		151				1.51	32.8	34.4	337.0	102.1		0.97	21.0	——		2.07	45.1	——		——	——	72	72	4.39	18.4	67.7				4.6
20230804	住院	Patient	男	2天	静脉血	已手工分类白细胞,红细胞、血小板形态未见异常.白细胞分类绝对值请按照校正白细胞计算。				100.00			0.05	1.0			0.21	4.0	48.3		174				3.17	61.0	38.6	360.0	107.1		0.62	12.0	——		1.14	22.0	——		——	——	100		4.51	21.0	75.7				5.2
20230804	住院	Patient	男	17天	静脉血	红细胞、白细胞、血小板形态未见异常。				ACCEPT			0.03	0.3			0.68	6.1	38.0		128				3.82	34.4	33.2	337.0	98.7		1.94	17.5	——		4.63	41.7	——		——	——	240		3.85	15.5	56.1				11.1
20230805	住院	Patient	女	9天	静脉血	红细胞、白细胞、血小板形态未见异常。				ACCEPT			0.03	0.5			0.01	0.2	33.6		121				2.60	41.3	39.3	354.0	110.9		0.62	9.9	——		3.03	48.1	——		——	——	122		3.03	16.5	66.5				6.3
20230805	住院	Patient	男	5天	静脉血	红细胞、白细胞、血小板形态未见异常。				Reflex			0.02	0.3			0.15	2.5	50.2		169				2.26	37.1	34.4	337.0	102.2		1.40	22.9	——		2.27	37.2	——		——	——	61	61	4.91	18.4	67.9				6.1
20230806	住院	Patient	男	5天	静脉血	红细胞、白细胞、血小板形态未见异常。	000044^35^2^1			UNACCEPT			0.01	0.2			0.11	2.2	42.4		137				2.05	41.8	33.7	323.0	104.2		1.21	24.7	——		1.52	31.1	——		——	——	66		4.07	18.4	69.7				4.9
20230806	住院	Patient	男	19天	静脉血	红细胞、白细胞、血小板形态未见异常。				ACCEPT			0.07	0.4			0.92	5.0	36.2		121				6.83	37.1	33.0	334.0	98.6		2.56	13.9	——		8.02	43.6	——		——	——	256	256	3.67	15.4	55.7				18.4
20230806	住院	Patient	男	4天	静脉血	已手工分类白细胞,红细胞、血小板形态未见异常.				0.1	0.09	3.0					0.30	10.0	46.1		168				1.38	46.0	38.8	364.0	106.5		0.57	19.0	——		0.66	22.0	——		——	——	69	69	4.33	20.2	75.3				3.0
20230807	住院	Patient	男	7天	静脉血	红细胞形态未见异常,白细胞形态未见异常,光学计数PLT.	000016^125^1^1			ACCEPT			0.01	0.2			0.13	2.2	41.0		132				3.18	53.9	34.3	322.0	106.5		1.33	22.6	——		1.24	21.1	——		——	——	106	106	3.85	18.2	70.7				5.9
20230807	住院	Patient	女	6天	静脉血	已手工分类白细胞,红细胞、血小板形态未见异常.				2.14									42.0		140				1.42	2.0	34.1	333.0	102.2		3.56	5.0	——		59.81	84.0	——		——	——	142		4.11	24.7	86.0				71.2
20230807	住院	Patient	男	7天	末梢血	红细胞、白细胞、血小板形态未见异常。				ACCEPT			0.03	0.3			0.17	1.8	50.1		162				3.27	35.2	33.0	323.0	102.0		2.02	21.7	——		3.81	41.0	——		——	——	151		4.91	18.8	70.7				9.3
20230807	住院	Patient	男	5天	静脉血	红细胞、白细胞、血小板形态未见异常。				ACCEPT			0.03	0.8			0.32	8.3	42.8		158				1.86	47.8	38.7	369.0	104.9		0.79	20.3	——		0.89	22.8	——		——	——	86	86	4.08	20.2	73.7				3.9
20230809	住院	Patient	女	19天	静脉血	红细胞、白细胞、血小板形态未见异常。				ACCEPT			0.03	0.3			0.31	3.6	41.8		145				4.87	56.6	38.9	347.0	112.1		1.05	12.2	——		2.35	27.3	——		——	——	188		3.73	18.6	77.4				8.6
20230810	住院	Patient	女	14天	静脉血	红细胞、白细胞、血小板形态未见异常。				3R已完成			0.02	0.2			0.04	0.4	34.9		121				6.64	65.7	37.5	347.0	108.0		1.02	10.1	——		2.38	23.6	——		——	——	52	52	3.23	17.2	68.2				10.1
20230810	住院	Patient	男	10天	静脉血	已手工分类白细胞,红细胞、血小板形态未见异常.				1.0							0.58	2.0	31.4		107				5.80	20.0	38.6	341.0	113.4		2.03	7.0	——		19.72	68.0	——		——	——	195		2.77	19.1	73.9				29.0
20230811	住院	Patient	女	14天	静脉血	红细胞、白细胞、血小板形态未见异常。	000344^114^1^1			ACCEPT			0.02	0.3			0.28	4.3	39.3		135				2.72	41.9	32.5	344.0	94.7		1.01	15.6	——		2.46	37.9	——		——	——	117		4.15	22.3	69.9				6.5
20230811	住院	Patient	女	15天	静脉血	红细胞、白细胞、血小板形态未见异常。				ACCEPT			0.01	0.1			0.12	1.1	31.6		112				4.79	42.8	37.3	354.0	105.3		1.40	12.5	——		4.87	43.5	——		——	——	117	117	3.00	17.6	67.6				11.2
20230811	住院	Patient	男	9天	静脉血	红细胞、白细胞、血小板形态未见异常。				ACCEPT			0.04	0.5			0.24	2.8	45.7		164				4.77	54.8	38.5	359.0	107.3		1.38	15.9	——		2.26	26.0	——		——	——	236	236	4.26	20.8	78.4				8.7
20230812	住院	Patient	女	1月16天	静脉血	红细胞、白细胞、血小板形态未见异常。	000341^55^3^1			ACCEPT			0.03	0.3			0.48	4.9	36.7		130				5.61	57.2	30.9	354.0	87.2		0.98	10.0	——		2.70	27.6	——		——	——	103	103	4.21	16.0	49.7				9.8
20230812	住院	Patient	男	12天	静脉血	已手工分类白细胞,红细胞、血小板形态未见异常.				ACCEPT							1.27	5.0	42.8		157				5.59	22.0	36.0	367.0	98.2		1.27	5.0	——		14.48	57.0	——		——	——	208	208	4.36	22.2	78.4				25.4
20230814	住院	Patient	女	1月18天	静脉血	红细胞、白细胞、血小板形态未见异常。				ACCEPT			0.04	0.3			0.75	5.8	38.4		131				7.34	56.9	30.5	341.0	89.3		1.33	10.3	——		3.44	26.7	——		——	——	106	106	4.30	15.4	49.8				12.9
20230815	住院	Patient	女	18天	静脉血	红细胞、白细胞、血小板形态未见异常。				ACCEPT			0.01	0.2			0.05	0.8	43.3		142				1.58	26.4	32.9	328.0	100.5		0.77	12.9	——		3.58	59.7	——		——	——	158		4.31	20.7	73.9				6.0
20230815	住院	Patient	女	18天	静脉血	红细胞、白细胞、血小板形态未见异常。				ACCEPT			0.01	0.2			0.05	0.8	43.3		142				1.58	26.4	32.9	328.0	100.5		0.77	12.9	——		3.58	59.7	——		——	——	158		4.31	20.7	73.9				6.0
20230816	住院	Patient	男	16天	静脉血	已手工分类白细胞,红细胞、血小板形态未见异常.				31.0			0.32	1.0					44.7		154				0.96	3.0	35.1	345.0	101.8		2.87	9.0	——		25.84	81.0	——		——	——	226		4.39	22.2	80.8			<5.00	31.9
20230816	住院	Patient	男	4天	静脉血	红细胞、白细胞、血小板形态未见异常。				ACCEPT			0.01	0.2			0.10	2.1	46.4		164				0.53	11.3	36.0	353.0	102.0		1.05	22.4	——		3.01	64.0	——		——	——	118		4.55	19.0	69.7				4.7
20230817	住院	Patient	女	27天	静脉血	红细胞、白细胞、血小板形态未见异常。	000351^102^1^1			ACCEPT			0.03	0.2			0.33	2.6	33.9		116				6.94	55.5	38.4	342.0	112.3		1.16	9.3	——		4.05	32.4	——		——	——	156		3.02	20.2	81.0				12.5
20230817	住院	Patient	男	5天	静脉血	红细胞、白细胞、血小板形态未见异常。				ACCEPT			0.00	0.0			0.22	3.9	45.3		151				0.92	16.1	35.4	333.0	106.3		1.35	23.7	——		3.21	56.3	——		——	——	98		4.26	19.3	73.7				5.7
20230817	住院	Patient	女	3天	静脉血	红细胞、白细胞、血小板形态未见异常。	000056^54^2^1			ACCEPT			0.03	0.3			0.44	3.9	49.3	15.2	145	33.4		66.6	3.75	33.2	23.7	294.0	80.6	18.2	1.42	12.6	——		5.65	50.0	——		——	——	206	206	6.12	23.3	61.9	0.3605	5.90		11.3
20230817	住院	Patient	女	2天	静脉血	红细胞、白细胞、血小板形态未见异常。				ACCEPT			0.05	0.4			0.37	2.9	48.3	21.8	144	39.7		60.3	3.25	25.6	24.0	298.0	80.5	17.9	2.27	17.9	——		6.76	53.2	——		——	——	205	205	6.00	23.4	60.5	0.3624	6.04		12.7
20230817	住院	Patient	男	17天	静脉血	已手工分类白细胞,红细胞形态未见异常.镜下可见血小板聚集，血小板结果仅供参考。				1.87									42.0		172				3.36	9.0	41.0	381.0	100.0		4.85	13.0	——		26.11	70.0	——		——	——	372	372	4.20	22.1	77.3				37.3
20230819	住院	Patient	男	19天	静脉血	红细胞、白细胞、血小板形态未见异常。	000020^85^3^1			ACCEPT			0.01	0.1			0.07	1.0	30.1		98				2.79	39.9	32.2	326.0	99.0		1.52	21.7	——		2.61	37.3	——		——	——	181		3.04	18.3	65.2				7.0
20230820	住院	Patient	男	20天	静脉血	已手工分类白细胞,红细胞形态未见异常.	000340^103^3^1			6.0									34.2		120				3.94	13.0	36.0	351.0	102.7		4.85	16.0	——		16.97	56.0	——		——	——	165	165	3.33	19.6	73.4				30.3
20230820	住院	Patient	男	8天	静脉血	红细胞、白细胞、血小板形态未见异常。				ACCEPT			0.02	0.2			0.48	4.3	40.1		136				1.38	12.3	34.3	339.0	101.0		3.01	26.9	——		6.31	56.3	——		——	——	205		3.97	18.8	68.7				11.2
20230821	住院	Patient	女	1月0天	静脉血	红细胞、白细胞、血小板形态未见异常。	000086^57^5^1			30.6			0.03	0.3			0.41	4.6			103				4.24	47.6	37.3	337.0	110.9		1.21	13.6	——		3.02	33.9	——		——	——	116		2.76	21.2	85.2				8.9
20230821	住院	Patient	女	6天	静脉血	红细胞、白细胞、血小板形态未见异常。				ACCEPT			0.04	0.5			0.22	2.8			175				4.11	52.0	39.4	340.0	115.8		1.41	17.8	——		2.13	26.9	——		——	——	137		4.44	18.6	75.5				7.9
20230821	住院	Patient	男	21天	静脉血	已手工分类白细胞,红细胞、血小板形态未见异常.				2.0							0.26	1.0			156				2.55	10.0	34.1	362.0	94.1		4.59	18.0	——		16.07	63.0	——		——	——	138		4.58	19.8	66.8				25.5
20230822	住院	Patient	女	17天	静脉血	已手工分类白细胞,红细胞形态未见异常.镜下血小板有聚集，不排除标本有微小凝块，张飞红医生要求出报告，请结合临床，结果仅供参考。	000342^47^2^1			Stain-Status Success			0.11	1.0			1.96	18.0			129				2.51	23.0	33.3	335.0	99.5		1.42	13.0	——		4.91	45.0	——		——	——	70	70	3.87	23.5	82.0				10.9
20230823	住院	Patient	女	18天	静脉血	红细胞、白细胞、血小板形态未见异常。	000045^12^3^1			UNACCEPT			0.02	0.2			1.39	12.0			126				2.78	24.0	33.1	329.0	100.5		2.78	24.0	——		4.62	39.8	——		——	——	59	59	3.81	22.6	82.4				11.6
20230824	住院	Patient	女	19天	静脉血	红细胞、白细胞形态未见异常。镜下血小板少见.				UNACCEPT			0.02	0.2			0.53	4.6			119				4.04	35.1	32.9	340.0	96.7		2.97	25.8	——		3.94	34.3	——		——	——	49	49	3.62	21.2	73.5				11.5
20230825	住院	Patient	女	20天	静脉血	红细胞、白细胞、血小板形态未见异常。	000043^75^4^1			35.8			0.01	0.1			0.61	4.9			118				5.63	45.0	32.9	330.0	99.7		3.29	26.3	——		2.96	23.7	——		——	——	58	58	3.59	21.2	76.3				12.5
20230825	住院	Patient	男	19天	静脉血	红细胞、白细胞、血小板形态未见异常。	000021^19^5^1			29.5			0.01	0.1			1.52	10.6			100				5.02	35.1	35.5	339.0	104.6		1.93	13.5	——		5.82	40.7	——		——	——	142		2.82	17.5	67.1				14.3
20230825	住院	Patient	男	25天	末梢血	已手工分类白细胞,红细胞、血小板形态未见异常.				ACCEPT											109				5.05	11.0	33.0	340.0	97.3		1.38	3.0	——		29.38	64.0	——		——	——	158		3.30	19.5	68.8				45.9
20230827	住院	Patient	男	21天	静脉血	红细胞、白细胞、血小板形态未见异常。	000073^17^4^1			39.5			0.01	0.1			1.25	13.0			136				4.34	45.2	33.7	344.0	98.0		1.47	15.3	——		2.53	26.4	——		——	——	117	117	4.03	18.9	67.9				9.6
20230827	住院	Patient	男	13天	静脉血	红细胞、白细胞、血小板形态未见异常。	000076^52^5^1			ACCEPT			0.05	0.5			0.24	2.4			161				6.79	67.2	36.9	334.0	110.6		0.68	6.7	——		2.34	23.2	——		——	——	179	179	4.36	16.5	66.9				10.1
20230828	住院	Patient	女	23天	静脉血	红细胞、白细胞、血小板形态未见异常。	000036^88^2^1			30.0			0.02	0.2			0.85	9.3			94				4.23	46.5	31.0	313.0	99.0		2.50	27.5	——		1.50	16.5	——		——	——	139		3.03	21.0	75.3				9.1
20230828	住院	Patient	女	13天	静脉血	红细胞、白细胞、血小板形态未见异常。	000050^17^1^1			ACCEPT			0.03	0.3			0.34	2.9			148				4.16	35.9	37.6	324.0	116.0		2.56	22.1	——		4.50	38.8	——		——	——	138		3.94	18.7	74.7				11.6
20230830	住院	Patient	女	6天	静脉血	已手工分类白细胞,红细胞、血小板形态未见异常.	000342^98^2^1			100.00	0.47	3.0					0.32	2.0			129				12.80	81.0	35.2	355.0	99.2		0.79	5.0	——		1.42	9.0	——		——	——	48	48	3.66	15.6	56.7				15.8
20230830	住院	Patient	女	25天	静脉血	红细胞、白细胞、血小板形态未见异常。				34.4			0.01	0.1			0.78	7.9			115				3.79	38.3	31.2	334.0	93.2		2.70	27.3	——		2.61	26.4	——		——	——	151		3.69	20.7	68.0				9.9
20230831	住院	Patient	女	7天	静脉血	f99O				ACCEPT			0.04	0.3			0.48	3.7			114				7.10	55.0	34.3	339.0	101.2		1.56	12.1	——		3.73	28.9	——		——	——	84	84	3.32	15.8	58.1				12.9
20230802	住院	Patient	男	0天	静脉血	已手工分类白细胞,红细胞、血小板形态未见异常.	000025^31^1^1			4.4									56.1		197				4.86	60.0	39.6	351.0	112.9		1.05	13.0	——		2.19	27.0	——		——	——	128		4.97	21.2	82.3				8.1
20230805	住院	Patient	男	3天	静脉血	已手工分类白细胞,红细胞、血小板形态未见异常.白细胞分类绝对值请按照校正白细胞计算。				0.6	0.11	3.0					0.29	8.0	46.5		173				1.44	40.0	39.7	372.0	106.7		0.50	14.0	——		1.26	35.0	——		——	——	88	88	4.36	20.6	75.1				3.6
20230808	住院	Patient	男	8天	静脉血	红细胞、白细胞、血小板形态未见异常。	000093^65^1^1			ACCEPT			0.03	0.3			0.17	1.5	46.0		151				4.91	42.7	33.0	328.0	100.7		2.35	20.4	——		4.04	35.1	——		——	——	159		4.57	18.9	70.3				11.5
20230809	住院	Patient	女	13天	静脉血	红细胞形态未见异常,白细胞形态未见异常,光学计数PLT,镜下PLT少见。	000085^66^5^1			UNACCEPT			0.03	0.3			0.04	0.4	30.3		107				6.03	59.1	38.5	353.0	109.0		1.15	11.3	——		2.95	28.9	——		——	——	45	45	2.78	17.1	68.5				10.2
20230809	住院	Patient	男	1月18天	静脉血	红细胞、白细胞、血小板形态未见异常。				ACCEPT			0.00	0.0			0.14	2.1	31.6		111				2.42	35.6	29.8	351.0	84.7		1.00	14.7	——		3.24	47.6	——		——	——	393	393	3.73	18.2	54.3				6.8
20230809	住院	Patient	女	12天	静脉血	红细胞、白细胞、血小板形态未见异常。				ACCEPT			0.01	0.2			0.10	1.8	39.3		146				2.33	44.0	34.1	372.0	91.8		1.03	19.4	——		1.83	34.6	——		——	——	118	118	4.28	21.8	65.1				5.3
20230812	住院	Patient	男	2天	静脉血	已手工分类白细胞,红细胞、血小板形态未见异常.白细胞分类绝对值请按照校正白细胞计算。光学计数血小板,镜下血小板少见.	000023^83^4^1			5.0			0.33	1.0			0.98	3.0	40.6	9.3	138	30.3		69.7	3.27	10.0	31.8	340.0	93.5	21.0	2.62	8.0	——		22.24	68.0	——		——	——	70	70	4.34	22.1	68.6	0.1744	4.00		32.7
20230816	住院	Patient	女	26天	静脉血	红细胞、白细胞、血小板形态未见异常。	000093^25^2^1			ACCEPT			0.04	0.3			0.41	3.1	34.8		121				5.78	44.1	37.5	348.0	107.7		1.36	10.4	——		5.52	42.1	——		——	——	181		3.23	19.9	78.3				13.1
20230902	住院	Patient	女	12天	静脉血	红细胞、白细胞、血小板形态未见异常。				ACCEPT			0.03	0.2		0.06	0.5			111				3.81	30.5	35.0	351.0	99.7		2.00	16.0	——			6.60	52.8	——	——	——	209		3.17	16.7	59.8				12.5	<0.5
20230904	住院	Patient	女	1月16天	静脉血	红细胞、白细胞、血小板形态未见异常。	000087^103^6^1			UNACCEPT			0.01	0.2		0.15	2.4			75				3.85	60.1	33.2	336.0	98.7		0.98	15.3	——			1.41	22.0	——	——	——	108	108	2.26	17.1	61.0				6.4	<0.5
20230904	住院	Patient	女	20天	静脉血	红细胞、白细胞、血小板形态未见异常。	000087^67^6^1			ACCEPT			0.02	0.2		0.71	7.6			124				4.45	47.8	37.7	331.0	114.0		1.16	12.5	——			2.97	31.9	——	——	——	220		3.29	20.3	78.1				9.3	0.6
20230904	住院	Patient	男	28天	静脉血	红细胞、白细胞、血小板形态未见异常。	000021^9^2^1			ACCEPT			0.06	0.7		0.58	6.4			124				3.69	41.0	31.9	347.0	91.8		1.84	20.4	——			2.84	31.5	——	——	——	185		3.89	16.7	56.4				9.0	<0.5
20230904	住院	Patient	男	15天	静脉血	红细胞、白细胞、血小板形态未见异常。				35.3			0.02	0.2		0.07	0.8			122				3.72	44.8	33.8	346.0	97.8		1.66	20.0	——			2.84	34.2	——	——	——	192		3.61	18.5	64.5				8.3	<0.5
20230907	住院	Patient	男	18天	静脉血	红细胞、白细胞、血小板形态未见异常。				ACCEPT			0.01	0.1		0.00	0.0			116				1.45	13.2	32.6	349.0	93.3		1.85	16.8	——			7.69	69.9	——	——	——	226		3.56	18.4	60.6				11.0	<0.5
20230907	住院	Patient	女	28天	静脉血	红细胞、白细胞、血小板形态未见异常。				UNACCEPT			0.01	0.2		0.32	5.4			118				3.38	56.4	34.3	363.0	94.5		0.54	9.0	——			1.74	29.0	——	——	——	5	5	3.44	14.6	50.8				6.0	<0.5
20230908	住院	Patient	男	20天	静脉血	17：50危急值（HGB/PLT）已通知临床102289杨思莹,对方已复述。				25.4			0.01	0.2		0.10	2.0			88				2.54	50.8	31.9	346.0	92.0		0.84	16.7	——			1.52	30.3	——	——	——	35	35	2.76	17.8	59.3				5.0	7.8
20230909	住院	Patient	男	21天	静脉血	红细胞、白细胞形态未见异常。镜下血小板少见.				UNACCEPT			0.00	0.0		0.12	1.6			80				3.08	42.2	31.6	356.0	88.9		1.74	23.9	——			2.36	32.3	——	——	——	41	41	2.53	17.2	56.4				7.3	5.6
20230910	住院	Patient	男	22天	静脉血	红细胞形态未见异常,白细胞形态未见异常,光学计数PLT.	000072^89^3^1			35.8			0.02	0.2		0.12	1.3			123				3.92	42.6	30.3	344.0	88.2		1.43	15.5	——			3.72	40.4	——	——	——	67	67	4.06	16.7	53.8				9.2	4.2
20230913	住院	Patient	女	7天	静脉血	红细胞、白细胞、血小板形态未见异常。				46.8			0.01	0.1		0.29	3.3			168				1.67	19.0	36.5	359.0	101.7		2.09	23.8	——			4.73	53.8	——	——	——	113	113	4.60	21.9	81.5				8.8	5.6
20230914	住院	Patient	男	22天	静脉血	红细胞、白细胞、血小板形态未见异常。				32.4			0.02	0.1		0.68	3.9			107				3.76	21.6	33.4	330.0	101.3		3.13	18.0	——			9.81	56.4	——	——	——	100		3.20	20.5	75.3				17.4	<0.5
20230915	住院	Patient	男	6天	静脉血	红细胞、白细胞、血小板形态未见异常。				Smear-Status Success			0.04	0.3		0.28	2.0			144				1.42	10.2	38.0	385.0	98.7		2.46	17.7	——			9.70	69.8	——	——	——	273		3.79	16.7	58.4				13.9	<0.5
20230916	住院	Patient	女	10天	静脉血	红细胞、白细胞、血小板形态未见异常。				ACCEPT			0.01	0.1		0.23	2.9	34.2		121				1.66	20.8	36.0	354.0	101.8		2.27	28.4	——			3.82	47.8	——	——	——	142		3.36	21.9	79.0				8.0	1.0
20230917	住院	Patient	女	3天	静脉血	已手工分类白细胞,红细胞、血小板形态未见异常.	000056^80^5^1			100.00						0.12	1.0	38.1	5.8	140	13.6		86.4	0.59	5.0	30.0	367.0	81.8	7.8	0.70	6.0	——			10.18	87.0	——	——	——	68	68	4.66	16.0	44.0	0.1007	2.16		11.7	0.9
20230917	住院	Patient	男	6天	静脉血	已手工分类白细胞,红细胞、血小板形态未见异常.白细胞分类绝对值请按照校正白细胞计算。				2.02						0.29	1.0	34.5		115				2.88	10.0	33.8	333.0	101.5		2.02	7.0	——			17.28	60.0	——	——	——	111		3.40	18.1	67.3				28.8	<0.5
20230918	住院	Patient	女	4天	静脉血	已手工分类白细胞,红细胞、血小板形态未见异常.白细胞分类绝对值请按照校正白细胞计算。	000001^68^4^1			0.00	0.00		0.00			0.38	3.0	39.8		143				1.14	9.0	29.6	359.0	82.4		1.40	11.0	——			9.14	72.0	——	——	——	30	30	4.83	17.2	45.5				12.7	3.2
20230918	住院	Patient	女	7天	静脉血	红细胞、白细胞、血小板形态未见异常。				ACCEPT			0.03	0.3		0.37	4.0	35.3		123				2.77	30.1	37.4	348.0	107.3		2.02	22.0	——			4.01	43.6	——	——	——	217		3.29	17.9	68.7				9.2	<0.5
20230918	住院	Patient	女	4天	静脉血	已手工分类白细胞,红细胞、血小板形态未见异常.				9.9	0.32	3.0				0.32	3.0	39.2		140				0.74	7.0	29.8	357.0	83.4		0.21	2.0	——			8.90	84.0	——	——	——	31	31	4.70	16.9	46.5				10.6	1.6
20230918	住院	Patient	男	7天	静脉血	已手工分类白细胞,红细胞、血小板形态未见异常.白细胞分类绝对值请按照校正白细胞计算。				Stain-Status Success	0.59	2.0						43.1		152				2.38	8.0	32.6	353.0	92.5		2.67	9.0	——			20.79	70.0	——	——	——	106		4.66	19.6	64.0				29.7	<0.5
20230919	住院	Patient	男	28天	静脉血	红细胞形态未见异常,白细胞形态未见异常,光学计数PLT.	000078^65^1^1			ACCEPT			0.02	0.2		0.48	4.6	37.2		125				7.79	74.2	32.2	336.0	95.9		0.75	7.1	——			1.46	13.9	——	——	——	180	180	3.88	15.7	54.9				10.5	<0.5
20230919	住院	Patient	女	5天	静脉血	白细胞分类绝对值请按照校正白细胞计算。				17.0						1.91	12.0	38.0		139				2.39	15.0	30.5	366.0	83.3		1.75	11.0	——			9.86	62.0	——	——	——	27	27	4.56	17.6	47.0				15.9	0.7
20230920	住院	Patient	女	14天	静脉血	红细胞、白细胞、血小板形态未见异常。	000344^122^5^1			ACCEPT			0.04	0.4		0.37	3.9	29.9		102				1.88	20.0	35.4	341.0	103.8		1.34	14.3	——			5.77	61.4	——	——	——	164		2.88	23.0	85.3				9.4	<0.5
20230922	住院	Patient	女	16天	静脉血	红细胞、白细胞、血小板形态未见异常。	000037^64^1^1			ACCEPT			0.04	0.4		0.38	4.0	31.5		110				1.82	19.4	32.1	349.0	91.8		1.78	18.9	——			5.39	57.3	——	——	——	113		3.43	23.9	77.0				9.4	<0.5
20230922	住院	Patient	女	14天	静脉血	红细胞、白细胞、血小板形态未见异常。				ACCEPT			0.02	0.3		0.17	2.3	37.6		129				5.30	72.6	33.0	343.0	96.2		0.90	12.3	——			0.91	12.5	——	——	——	123		3.91	16.0	57.1				7.3	<0.5
20230923	住院	Patient	女	12天	静脉血	红细胞、白细胞、血小板形态未见异常。	000040^90^1^1			ACCEPT			0.04	0.4		0.13	1.2	31.6		107				3.61	34.1	37.2	339.0	109.7		1.91	18.0	——			4.91	46.3	——	——	——	275	275	2.88	19.2	71.8				10.6	0.6
20230926	住院	Patient	女	2月30天	静脉血	红细胞、白细胞、血小板形态未见异常。	000087^47^1^1			ACCEPT			0.03	0.2		0.78	5.5	30.7		105				8.19	58.1	29.2	342.0	85.3		2.43	17.2	——			2.68	19.0	——	——	——	116	116	3.60	15.8	48.5				14.1	4.5
20231003	住院	Patient	女	13天	静脉血	红细胞、白细胞、血小板形态未见异常。				ACCEPT			0.00	0.0		0.48	6.7	33.1		123				1.53	21.6	35.5	372.0	95.7		0.74	10.4	——			4.35	61.3	——	——	——	122	122	3.46	19.7	66.7				7.1	<0.5
20231003	住院	Patient	女	13天	末梢血	红细胞、白细胞、血小板形态未见异常。				UNACCEPT			0.02	0.3		0.16	2.4	33.8		133				1.46	21.5	34.9	393.0	88.7		0.82	12.0	——			4.34	63.8	——	——	——	82	82	3.81	15.9	49.2				6.8	<0.5
20231004	住院	Patient	女	27天	静脉血	红细胞、白细胞、血小板形态未见异常。	000094^63^4^1			ACCEPT			0.02	0.1		0.07	0.4	34.5		122				8.00	42.8	31.0	354.0	87.8		2.19	11.7	——			8.42	45.0	——	——	——	93		3.93	16.9	53.2				18.7	3.8
20231005	住院	Patient	女	15天	静脉血	镜下血小板少见。红细胞、白细胞形态未见异常。				Stain-Status Success			0.01	0.2		0.38	6.3	28.2		97				1.21	20.1	31.9	344.0	92.8		1.09	18.1	——			3.32	55.3	——	——	——	57	57	3.04	16.9	56.4				6.0	<0.5
20231006	住院	Patient	女	16天	静脉血	红细胞、白细胞、血小板形态未见异常。				Reflex			0.01	0.1		0.37	5.3	34.2		130				1.48	21.2	33.2	380.0	87.5		0.99	14.2	——			4.14	59.2	——	——	——	73	73	3.91	15.8	48.9				7.0	<0.5
20231007	住院	Patient	女	10天	静脉血	红细胞、白细胞、血小板形态未见异常。	000050^111^4^1			ACCEPT			0.03	0.3		0.77	6.7	44.0		150				6.12	53.2	35.7	341.0	104.8		1.66	14.4	——			2.92	25.4	——	——	——	206		4.20	16.5	63.7				11.5	<0.5
20231007	住院	Patient	女	1月0天	动脉血	红细胞、白细胞、血小板形态未见异常。				ACCEPT			0.00	0.0		0.32	4.1	29.0		98				4.98	64.7	30.6	338.0	90.6		1.16	15.1	——			1.24	16.1	——	——	——	116	116	3.20	16.6	55.3				7.7	0.7
20231008	住院	Patient	男	1天	静脉血	已手工分类白细胞,白细胞分类绝对值请按照校正白细胞计算，镜下血小板难见。标本由脐静脉采集且患者正输液，结果请结合临床。	000037^17^1^1			0.00	0.00		0.00			0.00		24.5		79				3.29	70.0	42.5	322.0	131.7		0.28	6.0	——			1.13	24.0	——	——	——	8	8	1.86	18.6	90.5				4.7	<0.5
20231009	住院	Patient	女	19天	静脉血	红细胞、白细胞、血小板形态未见异常。				ACCEPT			0.04	0.3		0.08	0.6	34.5		122				2.00	14.4	31.5	354.0	89.1		2.56	18.4	——		9.22	66.3		——	——	——	110		3.87	16.6	53.0					13.9
20231010	住院	Patient	女	21天	静脉血	红细胞、白细胞、血小板形态未见异常。				ACCEPT			0.01	0.1		0.86	8.1	43.0		147				6.86	64.7	31.0	342.0	90.7		1.73	16.3	——		1.14	10.8		——	——	——	109	109	4.74	13.9	46.2					10.6
20231014	住院	Patient	男	1天	末梢血	已手工分类白细胞,红细胞形态未见异常.镜下PLT少见。白细胞分类绝对值请按照校正白细胞计算。				7.9								40.5		139				8.96	29.0	33.3	343.0	96.9		3.71	12.0	——		17.92	58.0		——	——	——	56	56	4.18	19.6	61.2					30.9
20231015	住院	Patient	女	8天	静脉血	红细胞、白细胞、血小板形态未见异常。	000071^113^6^1			ACCEPT			0.07	0.6		0.46	4.0	48.5		165				6.02	51.9	33.2	340.0	97.6		1.29	11.1	——		3.76	32.4		——	——	——	188		4.97	16.9	60.6					11.6
20231015	住院	Patient	男	2天	静脉血	已手工分类白细胞,红细胞、血小板形态未见异常.				7.5								27.7		96				6.36	43.0	33.4	347.0	96.5		3.26	22.0	——		5.18	35.0		——	——	——	85		2.87	19.9	60.1					14.8
20231016	住院	Patient	男	8天	静脉血	镜下血小板难见.红细胞、白细胞形态未见异常。				ACCEPT			0.00	0.0		0.18	5.2	38.3		131				1.74	49.6	32.8	342.0	96.0		0.72	20.6	——		0.86	24.6		——	——	——	26	26	3.99	17.2	56.1					3.5
20231016	住院	Patient	男	3天	静脉血	已手工分类白细胞,红细胞、血小板形态未见异常.				UNACCEPT	0.00		0.02			0.89		36.4		125				2.27	21.0	32.5	343.0	94.5		1.84	17.0	——		6.59	61.0		——	——	——	76		3.85	19.7	57.1					10.8
20231017	住院	Patient	男	9天	静脉血	红细胞、白细胞、血小板形态未见异常。镜下血小板少见。				Stain-Error			0.01	0.2		0.06	1.0	41.2	1.6	141	6.8		93.2	2.46	39.6	32.2	342.0	94.1	5.2	1.17	18.9	——		2.50	40.3		——	——	——	15		4.38	16.9	53.8	0.0368	0.84			6.2
20231017	住院	Patient	男	4天	静脉血	标本量不足，未做PLT-F，镜下查见大血小板，PLT结果仅供参考。白细胞分类绝对值请按照校正白细胞计算。已手工分类白细胞,红细胞形态未见异常.				UNACCEPT			0.00	0.0		0.73	8.0	38.5		130				2.28	25.0	32.5	338.0	96.3		1.82	20.0	——		4.10	45.0		——	——	——	55		4.00	20.5	59.5					9.1
20231018	住院	Patient	男	5天	静脉血	已手工分类白细胞,红细胞、血小板形态未见异常.白细胞分类绝对值请按照校正白细胞计算。				6.0						0.07	1.0	32.8		113				1.33	19.0	32.6	345.0	94.5		1.47	21.0	——		4.13	59.0		——	——	——	63	63	3.47	19.4	59.7					7.0
20231019	住院	Patient	男	6天	静脉血	红细胞、白细胞、血小板形态未见异常。				ACCEPT			0.02	0.3		0.33	5.7	42.4		142				1.45	25.0	34.8	335.0	103.9		1.60	27.6	——		2.40	41.4		——	——	——	102		4.08	19.3	72.1					5.8
20231020	住院	Patient	男	7天	静脉血	红细胞、白细胞、血小板形态未见异常。				ACCEPT			0.01	0.1		0.53	7.4	31.8		111				1.14	16.1	31.9	349.0	91.4		1.97	27.7	——		3.46	48.7		——	——	——	139	139	3.48	18.1	55.8					7.1
20231024	住院	Patient	男	11天	静脉血	红细胞、白细胞、血小板形态未见异常。				ACCEPT			0.01	0.2		0.43	6.7	28.2		95				1.28	20.0	31.5	337.0	93.4		1.12	17.5	——		3.56	55.6		——	——	——	187		3.02	17.3	56.8					6.4
20231024	住院	Patient	男	2月1天	静脉血	红细胞、白细胞、血小板形态未见异常。				ACCEPT			0.01	0.1		0.31	4.2	27.7		98				3.96	54.3	29.6	354.0	83.7		1.08	14.8	——		1.94	26.6		——	——	——	93	93	3.31	17.0	51.6					7.3
20231026	住院	Patient	女	1天	静脉血	已手工分类白细胞,红细胞、血小板形态未见异常.白细胞分类绝对值请按照校正白细胞计算。	000044^52^3^1			0.24			0.49	2.0		0.24	1.0	42.2	25.6	125	49.0		51.0	7.81	32.0	22.9	296.0	77.4	23.4	2.93	12.0	——		12.69	52.0		——	——	——	384	384	5.45	27.4	63.3	0.4318	7.78			24.4
20231027	住院	Patient	女	15天	静脉血	红细胞形态未见异常,白细胞形态未见异常,光学计数PLT.	000348^122^4^1			ACCEPT			0.04	0.4		0.26	2.3	38.7		133				5.07	45.7	33.5	344.0	97.5		2.15	19.4	——		3.57	32.2		——	——	——	95	95	3.97	15.6	55.8					11.1
20231029	住院	Patient	男	2月10天	静脉血	镜下血小板偶见.红细胞形态未见异常,白细胞形态未见异常,光学计数PLT.	000053^98^2^1			Stain-Status Success			0.03	0.3		0.13	1.4	32.9		104				6.06	64.5	27.2	316.0	86.1		1.51	16.1	——		1.66	17.7		——	——	——	32	32	3.82	14.7	46.5					9.4
20231030	住院	Patient	男	2月11天	动脉血	红细胞、白细胞、血小板形态未见异常。				3R已完成			0.01	0.2		0.08	1.8	27.0		88				3.02	64.2	27.2	326.0	83.3		0.80	17.0	——		0.79	16.8		——	——	——	33	33	3.24	14.8	45.2					4.7
20231031	住院	Patient	男	2月12天	静脉血	红细胞、白细胞、血小板形态未见异常。				ACCEPT			0.02	0.3		0.14	1.8	29.1		94				5.24	68.9	27.3	323.0	84.6		1.12	14.7	——		1.09	14.3		——	——	——	48	48	3.44	15.1	46.3					7.6
20231102	住院	Patient	男	2月14天	静脉血	红细胞、白细胞、血小板形态未见异常。				UNACCEPT			0.00	0.0		0.04	0.9	19.4		66				2.56	55.7	27.5	340.0	80.8		0.49	10.6	——		1.51	32.8		——	——	——	3	3	2.40	14.8	43.9					4.6
20231103	住院	Patient	男	0天	静脉血	已手工分类白细胞,红细胞、血小板形态未见异常.白细胞分类绝对值请按照校正白细胞计算。	000024^43^1^1			UNACCEPT	0.00		0.00			0.00		62.8	11.9	227	22.2		77.8	2.26	19.0	41.7	361.0	115.2	10.3	0.36	3.0	——		8.57	72.0		——	——	——	54	54	5.45	19.5	78.8	0.2158	3.96			11.9
20231103	住院	Patient	男	1天	静脉血	已手工分类白细胞,红细胞、血小板形态未见异常.白细胞分类绝对值请按照校正白细胞计算。	000034^99^5^1			100.00						0.10	1.0	64.6		231				3.00	30.0	42.2	358.0	118.1		0.70	7.0	——		6.20	62.0		——	——	——	60	60	5.47	19.7	80.1					10.0
20231104	住院	Patient	男	2天	静脉血	红细胞、白细胞、血小板形态未见异常。	000349^89^4^1			UNACCEPT			0.02	0.7		0.05	0.9	57.4		196				1.90	42.6	40.7	341.0	119.3		0.56	13.0	——		1.87	42.8		——	——	——	44	43	4.81	20.1	82.2					4.4
20231104	住院	Patient	女	13天	静脉血	已手工分类白细胞,红细胞、血小板形态未见异常.				12.5						0.52	4.0	35.8		115				4.68	36.0	35.5	321.0	110.5		0.52	4.0	——		7.28	56.0		——	——	——	188		3.24	17.4	69.8					13.0
20231105	住院	Patient	男	3天	静脉血	白细胞分类绝对值请按照校正白细胞计算。镜下血小板少见	000044^115^6^1			Reflex+Stain-Status Success			0.01	0.3		0.16	3.6	55.3		187				1.89	43.0	40.8	338.0	120.7		0.82	18.6	——		1.52	34.5		——	——	——	64	64	4.58	20.9	89.6					4.4
20231105	住院	Patient	女	8天	静脉血	已手工分类白细胞,红细胞、血小板形态未见异常.白细胞分类绝对值请按照校正白细胞计算。	000072^56^3^1			ACCEPT						0.13	1.0	28.2		104				2.25	18.0	46.6	369.0	126.5		0.50	4.0	——		9.63	77.0		——	——	——	170	170	2.23	18.7	82.7					12.5
20231106	住院	Patient	男	6天	静脉血	红细胞、白细胞、血小板形态未见异常。	000012^32^1^1			UNACCEPT			0.01	0.1		0.56	7.6	37.9		137				3.06	41.3	36.0	361.0	99.5		1.60	21.6	——		2.18	29.4		——	——	——	65	65	3.81	13.9	50.9					7.4
20231106	住院	Patient	女	9天	静脉血	标本存在脂血，红细胞参数为血浆置换后结果，请结合临床。已手工分类白细胞,红细胞、血小板形态未见异常.				7.0								26.1		92				2.47	24.0	41.6	352.0	118.1		1.24	12.0	——		6.59	64.0		——	——	——	122		2.21	18.2	75.9					10.3
20231106	住院	Patient	女	1月17天	静脉血	红细胞、白细胞、血小板形态未见异常。				ACCEPT			0.00	0.0		0.13	2.7	27.3		97				1.48	30.2	29.1	355.0	82.0		0.58	11.9	——		2.70	55.2		——	——	——	90	90	3.33	15.4	44.4					4.9
20231106	住院	Patient	女	15天	静脉血	红细胞、白细胞、血小板形态未见异常。				ACCEPT			0.01	0.1		0.29	3.8	32.0		106				2.30	30.6	35.6	331.0	107.4		0.41	5.5	——		4.50	60.0		——	——	——	181		2.98	18.1	70.1					7.5
20231107	住院	Patient	男	2月15天	静脉血	红细胞、白细胞、血小板形态未见异常。				ACCEPT			0.01	0.1		0.09	1.0	28.2		89				2.97	33.8	27.9	316.0	88.4		1.43	16.3	——		4.29	48.8		——	——	——	230		3.19	20.3	62.6					8.8
20231107	住院	Patient	男	5天	静脉血	红细胞、白细胞形态未见异常。镜下血小板少见。				3R已完成			0.03	0.6		0.13	2.7	50.4		173				1.60	33.4	40.3	343.0	117.5		1.13	23.6	——		1.91	39.7		——	——	——	39	39	4.29	18.9	81.5					4.8
20231108	住院	Patient	男	6天	静脉血	红细胞、白细胞、血小板形态未见异常。	000022^110^5^1			UNACCEPT			0.02	0.3		0.07	1.2	44.7		151				1.70	28.8	39.9	338.0	118.3		1.56	26.4	——		2.55	43.3		——	——	——	48	48	3.78	18.8	81.8					5.9
20231108	住院	Patient	女	10天	静脉血	已手工分类白细胞,红细胞、血小板形态未见异常.白细胞分类绝对值请按照校正白细胞计算。				0.00	0.00		0.00			0.58	5.0	25.7		91				3.25	28.0	35.3	354.0	99.6		1.39	12.0	——		6.38	55.0		——	——	——	56	56	2.58	20.1	70.4					11.6
20231108	住院	Patient	女	13天	静脉血	标本严重脂血，仪器检测HGB结果不可信，此为根据既往MCHC结果估算的HGB，建议采集至少2ML静脉血复查。已手工分类白细胞,红细胞、血小板形态未见异常.				0.00	0.00		0.00			0.31	1.0	39.8		133				1.85	6.0	37.4	335.0	89.6		7.39	24.0	——		21.25	69.0		——	——	——	249		4.44	21.2	62.4					30.8
20231108	住院	Patient	男	6天	静脉血	红细胞、白细胞、血小板形态未见异常。				ACCEPT			0.02	0.2		0.22	2.2	50.9		182				2.24	22.2	39.4	358.0	110.2		1.01	10.0	——		6.61	65.4		——	——	——	130		4.62	16.3	66.5					10.1
20231109	住院	Patient	男	27天	静脉血	已手工分类白细胞,红细胞、血小板形态未见异常.白细胞分类绝对值请按照校正白细胞计算。镜下血小板减少。	000067^68^2^1			0.31						1.09	7.0	37.3		126				3.43	22.0	31.8	338.0	94.2		1.72	11.0	——		9.05	58.0		——	——	——	53	53	3.96	18.7	63.3					15.6
20231109	住院	Patient	女	12天	静脉血	已手工分类白细胞,红细胞、血小板形态未见异常.				UNACCEPT			0.11	1.0		0.33	3.0	27.1		97				3.52	32.0	35.1	358.0	98.2		0.88	8.0	——		5.50	50.0		——	——	——	62		2.76	19.9	68.6					11.0
20231110	住院	Patient	男	1月13天	静脉血	红细胞、白细胞形态未见异常，镜下血小板少见.	000028^95^6^1			3R已完成+Stain-Status Success			0.03	0.3		0.13	1.5	48.9	0.3	166	1.6		98.4	1.95	22.7	28.9	339.0	85.0	1.3	1.01	11.8	——		5.48	63.7		——	——	——	53	53	5.75	21.6	58.8	0.0224	0.39			8.6
20231110	住院	Patient	男	8天	静脉血	红细胞、白细胞、血小板形态未见异常。				3R已完成			0.02	0.3		0.09	1.4	41.6		142				1.98	30.0	39.7	341.0	116.2		1.54	23.4	——		2.96	44.9		——	——	——	65	65	3.58	19.0	80.2					6.6
20231111	住院	Patient	男	9天	静脉血	红细胞、白细胞、血小板形态未见异常。	000345^34^4^1			ACCEPT			0.12	0.6		0.29	1.4	60.7		202				5.03	24.4	32.4	333.0	97.3		4.26	20.7	——		10.90	52.9		——	——	——	135		6.24	20.0	67.9					20.6
20231111	住院	Patient	女	14天	静脉血	已手工分类白细胞,红细胞形态未见异常。镜下易见大血小板。白细胞分类绝对值请按照校正白细胞计算。				1.0			0.12	1.0				41.6		149				2.76	24.0	33.6	358.0	93.9		0.92	8.0	——		7.48	65.0		——	——	——	128	128	4.43	18.2	59.7					11.5
20231112	住院	Patient	女	17天	静脉血	已手工分类白细胞,红细胞、血小板形态未见异常.白细胞分类绝对值请按照校正白细胞计算。				2.0						0.20	1.0	39.9		139				4.49	22.0	33.1	348.0	95.0		4.28	21.0	——		11.02	54.0		——	——	——	168		4.20	22.2	67.6					20.4
20231113	住院	Patient	男	1月0天	静脉血	红细胞、白细胞、血小板形态未见异常。				Reflex			0.03	0.3		0.68	6.5	30.4		106				3.47	33.4	31.6	349.0	90.7		2.40	23.1	——		3.82	36.7		——	——	——	56		3.35	18.0	58.1					10.4
20231113	住院	Patient	男	11天	静脉血	红细胞、白细胞、血小板形态未见异常。				ACCEPT			0.03	0.4		0.11	1.6	39.3		131				3.11	44.4	39.5	333.0	118.4		1.18	16.8	——		2.58	36.8		——	——	——	114	114	3.32	18.6	81.0					7.0
20231114	住院	Patient	男	5天	静脉血	红细胞、白细胞、血小板形态未见异常。	000091^120^2^1			ACCEPT			0.09	0.6		0.29	2.0	49.3	10.4	175	25.6		74.4	4.12	28.8	35.2	355.0	99.2	15.2	3.03	21.2	——		6.78	47.4		——	——	——	245		4.97	17.8	64.9	0.1064	2.14			14.3
20231114	住院	Patient	女	17天	静脉血	已手工分类白细胞,红细胞、血小板形态未见异常.				0.16								42.0		150				3.79	24.0	40.2	358.0	98.1		1.42	9.0	——		10.27	65.0		——	——	——	194		4.28	18.5	63.1					15.8
20231115	住院	Patient	女	1天	静脉血	已手工分类白细胞,红细胞、血小板形态未见明显异常.				Stain-Status Success								32.2		63				176.25	15.0	26.7	193.0	138.8		23.50	2.0	——		23.50	2.0		——	——	——	14	14	2.32	-----	-----					1175.0
20231115	住院	Patient	男	14天	静脉血	已手工分类白细胞,红细胞、血小板形态未见异常.				5.0								40.2		135				2.48	21.0	33.1	336.0	98.5		2.01	17.0	——		7.32	62.0		——	——	——	104		4.08	24.9	83.6					11.8
20231116	住院	Patient	男	16天	静脉血	红细胞、白细胞、血小板形态未见异常。	000054^74^1^1			UNACCEPT			0.01	0.2		0.09	1.9	31.0		113				3.05	64.9	34.9	365.0	95.7		0.92	19.6	——		0.63	13.4		——	——	——	46	46	3.24	13.2	46.8					4.7
20231116	住院	Patient	男	1月3天	静脉血	红细胞、白细胞、血小板形态未见异常。				UNACCEPT			0.03	0.3		0.88	9.8	24.9		89				3.15	35.0	31.8	357.0	88.9		1.85	20.6	——		3.09	34.3		——	——	——	65		2.80	18.6	59.8					9.0
20231116	住院	Patient	女	19天	静脉血	红细胞、白细胞、血小板形态未见异常。				Pending			0.06	0.3		0.10	0.5	40.9		142				5.44	27.6	33.6	347.0	96.9		4.63	23.5	——		9.48	48.1		——	——	——	152		4.22	17.7	60.9					19.7
20231117	住院	Patient	男	17天	静脉血	红细胞形态未见异常,白细胞形态未见异常,光学计数PLT.	000028^22^5^1			Reflex			0.02	0.3		0.15	2.0	30.7		111				4.49	61.5	35.4	362.0	97.8		0.94	12.9	——		1.70	23.3		——	——	——	47	47	3.14	13.2	47.1					7.3
20231117	住院	Patient	男	15天	静脉血	红细胞、白细胞、血小板形态未见异常。				ACCEPT			0.05	0.6		0.22	2.8	32.6		109				3.06	38.7	39.4	334.0	117.7		1.18	14.9	——		3.40	43.0		——	——	——	150	150	2.77	18.4	77.7					7.9
20231117	住院	Patient	女	22天	静脉血	已手工分类白细胞,部分成熟RBC中空淡染区扩大，镜下可见不规则异形RBC，可见大血小板。				ACCEPT						1.35	10.0	27.8		93				3.24	24.0	31.3	335.0	93.6		1.76	13.0	——		6.35	47.0		——	——	——	126	126	2.97	23.6	69.6					13.5
20231118	住院	Patient	男	1月5天	静脉血	红细胞、白细胞、血小板形态未见异常。	000055^115^4^1			ACCEPT			0.01	0.1		1.14	13.3	35.6		119				3.20	37.2	30.4	334.0	90.8		2.00	23.3	——		2.24	26.1		——	——	——	86	86	3.92	17.4	55.2					8.6
20231118	住院	Patient	女	21天	静脉血	红细胞、白细胞、血小板形态未见异常。	000014^12^2^1			ACCEPT			0.01	0.1		0.86	6.3	31.2		104				3.86	28.4	34.2	333.0	102.6		3.26	24.0	——		5.60	41.2		——	——	——	146	146	3.04	17.3	64.1					13.6
20231119	住院	Patient	男	17天	静脉血	红细胞、白细胞、血小板形态未见异常。				ACCEPT			0.03	0.5		0.09	1.4	31.0		100				3.02	45.8	38.2	323.0	118.3		0.92	13.9	——		2.53	38.4		——	——	——	170		2.62	18.6	79.4					6.6
20231119	住院	Patient	男	16天	静脉血	已手工分类白细胞,红细胞、血小板形态未见异常.				Stain-Status Success						1.33	12.0	42.9		134				3.89	35.0	34.3	312.0	109.7		0.11	1.0	——		5.77	52.0		——	——	——	182		3.91	26.4	105.2					11.1
20231122	住院	Patient	女	25天	静脉血	红细胞、白细胞、血小板形态未见异常。	000348^102^6^1			ACCEPT			0.00	0.0		0.63	8.3	26.3		84				2.05	27.0	33.9	319.0	106.0		1.48	19.5	——		3.44	45.2		——	——	——	147		2.48	18.0	68.0					7.6
20231122	住院	Patient	女	27天	静脉血	红细胞、白细胞、血小板形态未见异常。				ACCEPT			0.03	0.2		0.36	2.7	24.4		77				2.34	17.6	29.7	316.0	94.2		2.07	15.6	——		8.50	63.9		——	——	——	122		2.59	25.3	78.2					13.3
20231123	住院	Patient	男	21天	静脉血	红细胞、白细胞、血小板形态未见异常。				ACCEPT			0.02	0.3		0.10	1.5	27.6		95				2.04	30.0	39.7	344.0	115.5		0.99	14.6	——		3.64	53.6		——	——	——	144		2.39	18.1	76.5					6.8
20231123	住院	Patient	男	1月10天	静脉血	红细胞、白细胞、血小板形态未见异常。				ACCEPT			0.01	0.1		0.41	5.0	30.8		105				3.18	38.8	30.8	341.0	90.3		2.48	30.2	——		2.12	25.9		——	——	——	120	120	3.41	17.4	55.5					8.2
20231123	住院	Patient	女	28天	静脉血	红细胞、白细胞、血小板形态未见异常。				Pending			0.03	0.3		0.32	2.9	32.1		108				2.82	25.2	30.9	336.0	91.7		1.74	15.5	——		6.28	56.1		——	——	——	118	118	3.50	20.7	61.2					11.2
20231123	住院	Patient	女	26天	静脉血	红细胞、白细胞、血小板形态未见异常。				ACCEPT			0.02	0.2		0.66	6.7	34.4		109				2.10	21.2	32.8	317.0	103.6		1.39	14.0	——		5.73	57.9		——	——	——	125		3.32	18.5	67.0					9.9
20231126	住院	Patient	男	24天	静脉血	红细胞、白细胞、血小板形态未见异常。	000074^33^3^1			ACCEPT			0.02	0.3		0.15	2.2	26.0		86				2.04	30.4	37.4	331.0	113.0		1.13	16.9	——		3.36	50.2		——	——	——	113	113	2.30	17.9	74.0					6.7
20231127	住院	Patient	男	25天	静脉血	红细胞、白细胞、血小板形态未见异常。	000002^42^1^1			ACCEPT			0.04	0.5		0.13	1.5	37.7		124				2.23	25.3	34.1	329.0	103.6		1.13	12.8	——		5.27	59.9		——	——	——	114		3.64	21.5	79.2					8.8
20231130	住院	Patient	女	1月4天	静脉血	红细胞、白细胞、血小板形态未见异常。	000035^14^5^1			ACCEPT			0.04	0.3		0.43	3.4	32.4		106				4.31	34.2	30.2	327.0	92.3		2.04	16.2	——		5.78	45.9		——	——	——	131	131	3.51	21.8	69.9					12.6
20231201	住院	Patient	女	19天	静脉血	已手工分类白细胞,红细胞、血小板形态未见异常.白细胞分类绝对值请按照校正白细胞计算。	000012^100^2^1			0.00	0.00		0.00			0.10	1.0	24.7		80				3.76	38.0	33.5	324.0	103.3		1.68	17.0	——		4.36	44.0		——	——	——	111	111	2.39	17.4	65.4					9.9
20231203	住院	Patient	女	19天	静脉血	已手工分类白细胞,红细胞、血小板形态未见异常.白细胞分类绝对值请按照校正白细胞计算。	000071^13^5^1			9.9	0.11	1.0	0.34	3.0		0.80	7.0	31.2		110				4.56	40.0	35.6	353.0	101.0		2.85	25.0	——		2.62	23.0		——	——	——	101		3.09	19.9	71.7					11.4
20231203	住院	Patient	女	21天	静脉血	已手工分类白细胞,红细胞、血小板形态未见异常.	000095^112^4^1			7.0			0.00	0.0		0.55	5.0	34.7		115				6.71	61.0	32.7	331.0	98.6		0.88	8.0	——		2.86	26.0		——	——	——	138	138	3.52	17.9	63.2					11.0
20231205	住院	Patient	男	1月3天	静脉血	红细胞、白细胞、血小板形态未见异常。				ACCEPT			0.02	0.3		0.25	3.5	34.9		119				2.93	41.2	33.7	341.0	98.9		0.96	13.5	——		2.95	41.5		——	——	——	119		3.53	17.2	62.4					7.1
20231207	住院	Patient	女	5天	静脉血	红细胞、白细胞、血小板形态未见异常。	000350^6^6^1			ACCEPT			0.04	0.4		0.51	5.4	44.3		151				3.88	41.3	37.9	341.0	111.3		1.58	16.8	——		3.39	36.1		——	——	——	206	206	3.98	16.5	67.7					9.4
20231207	住院	Patient	女	1月9天	静脉血	红细胞、白细胞、血小板形态未见异常。				ACCEPT			0.01	0.1		0.17	1.3	24.6		84				2.71	21.0	32.2	341.0	94.3		1.88	14.6	——		8.13	63.0		——	——	——	248		2.61	18.2	59.4					12.9
20231208	住院	Patient	女	1月10天	静脉血	红细胞、白细胞、血小板形态未见异常。	000355^35^5^1			ACCEPT			0.03	0.2		0.33	2.4	34.3		116				3.11	22.5	31.2	338.0	92.2		2.40	17.4	——		7.94	57.5		——	——	——	209		3.72	18.5	58.3					13.8
20231208	住院	Patient	女	1月12天	静脉血	红细胞形态未见异常,白细胞形态未见异常,光学计数PLT.				ACCEPT			0.04	0.3		0.21	1.7	29.9		102				4.54	36.9	29.5	341.0	86.4		2.29	18.6	——		5.23	42.5		——	——	——	218	218	3.46	20.1	60.5					12.3
20231211	住院	Patient	男	14天	静脉血	红细胞、白细胞、血小板形态未见异常。				ACCEPT			0.03	0.3		0.22	2.1	34.7		121				2.01	19.3	34.5	349.0	98.9		2.08	20.0	——		6.06	58.3		——	——	——	116		3.51	20.1	66.5					10.4
20231213	住院	Patient	女	11天	静脉血	红细胞、白细胞、血小板形态未见异常。	000082^109^4^1			ACCEPT			0.03	0.3		0.56	5.4	37.0		122				4.93	47.9	35.8	330.0	108.5		1.79	17.4	——		2.99	29.0		——	——	——	264		3.41	17.1	67.0					10.3
20231215	住院	Patient	男	18天	静脉血	已手工分类白细胞,红细胞、血小板形态未见异常.				100.00								35.2		118				4.16	21.0	33.7	335.0	100.6		3.76	19.0	——		11.88	60.0		——	——	——	108		3.50	19.3	68.4					19.8
20231215	住院	Patient	男	18天	静脉血	红细胞、白细胞、血小板形态未见异常。				UNACCEPT			0.06	0.3		0.02	0.1	31.0		102				3.22	16.2	35.3	329.0	107.3		3.70	18.6	——		12.90	64.8		——	——	——	118		2.89	19.4	75.6					19.9
20231216	住院	Patient	男	2月3天	静脉血	红细胞、白细胞、血小板形态未见异常。				ACCEPT			0.02	0.2		0.18	2.1	34.1		115				4.96	59.0	27.6	337.0	82.0		1.54	18.3	——		1.71	20.4		——	——	——	214		4.16	16.4	48.1					8.4
20231216	住院	Patient	男	19天	静脉血	红细胞、白细胞、血小板形态未见异常。				Pending			0.04	0.2		0.30	1.7	38.8		129				1.66	9.3	32.3	332.0	97.0		4.44	24.8	——		11.46	64.0		——	——	——	99		4.00	21.7	74.9					17.9
20231218	住院	Patient	男	21天	静脉血	红细胞、白细胞、血小板形态未见异常。				ACCEPT			0.02	0.2		0.01	0.1	37.8		127				2.23	18.3	31.6	336.0	94.0		2.15	17.6	——		7.78	63.8		——	——	——	85	85	4.02	19.7	65.4					12.2
20231218	住院	Patient	女	4天	静脉血	已手工分类白细胞,红细胞形态未见异常，光学计数血小板。白细胞分类绝对值请按照校正白细胞计算。				27.0	0.00		0.00			0.00		40.4		136				5.32	19.0	29.5	337.0	87.6		7.56	27.0	——		8.68	31.0		——	——	——	120	120	4.61	27.9	84.8					28.0
20231219	住院	Patient	女	20天	静脉血	红细胞、白细胞、血小板形态未见异常。				ACCEPT			0.03	0.4		0.45	5.8	20.5		70				1.70	22.1	34.5	341.0	101.0		0.88	11.4	——		4.64	60.3		——	——	——	191	191	2.03	25.2	90.6					7.7
20231219	住院	Patient	女	5天	静脉血	已手工分类白细胞,红细胞、血小板形态未见异常.白细胞分类绝对值请按照校正白细胞计算。				100.00								30.6		102				4.39	13.0	29.6	333.0	88.7		2.03	6.0	——		19.27	57.0		——	——	——	94	94	3.45	27.7	83.6					33.8
20231220	住院	Patient	女	21天	静脉血	红细胞形态未见异常,白细胞形态未见异常,光学计数PLT.	000021^23^5^1			ACCEPT			0.03	0.4		0.15	2.0	26.3		87				0.81	10.8	26.1	331.0	79.0		0.88	11.7	——		5.63	75.1		——	——	——	141	141	3.33	33.7	83.4					7.5
20231220	住院	Patient	女	6天	静脉血	已手工分类白细胞,红细胞、血小板形态未见异常.白细胞分类绝对值请按照校正白细胞计算。				10.0						0.43	1.0	43.9		152				12.10	28.0	28.9	346.0	83.5		3.89	9.0	——		17.28	40.0		——	——	——	124		5.26	25.2	72.7					43.2
20231221	住院	Patient	女	22天	静脉血	外周成熟RBC大小极度不等,镜下呈双群分布，请结合临床。白细胞、血小板形态未见异常。	000049^41^5^1			ACCEPT			0.03	0.5		0.46	8.2	39.3		129				1.30	23.3	28.4	328.0	86.6		0.89	15.9	——		2.92	52.1		——	——	——	104	104	4.54	-----	-----					5.6
20231014	住院	Patient	女	0天	静脉血	已手工分类白细胞,红细胞形态未见异常.镜下血小板少见.	^72^7^1			Stain-Status Success						0.15	1.0	51.0	18.3	163	36.6		63.4	6.96	48.0	39.0	320.0	122.0	18.3	1.45	10.0	——		5.95	41.0		——	——	——	54	54	4.18	24.6	110.7	0.2965	7.01			14.5
20231015	住院	Patient	女	1天	静脉血	已手工分类白细胞,红细胞、血小板形态未见异常.白细胞分类绝对值请按照校正白细胞计算。				1.0	0.24	2.0						50.1		164				2.40	20.0	39.3	327.0	120.1		0.96	8.0	——		8.28	69.0		——	——	——	32	32	4.17	25.3	110.2					12.0
20231019	住院	Patient	女	5天	静脉血	红细胞、白细胞形态未见异常。镜下血小板少见.				Reflex			0.01	0.2		0.19	3.9	41.5		137				2.92	59.5	38.4	330.0	116.2		0.56	11.5	——		1.22	24.9		——	——	——	44	44	3.57	22.0	95.3					4.9
20231021	住院	Patient	女	7天	静脉血	红细胞形态未见异常,白细胞形态未见异常,光学计数PLT.				UNACCEPT			0.01	0.2		0.13	2.8	34.4		112				2.62	55.8	36.8	326.0	113.2		0.40	8.5	——		1.54	32.7		——	——	——	35	35	3.04	20.5	86.6					4.7
20231022	住院	Patient	女	8天	静脉血	红细胞、白细胞、血小板形态未见异常。	000001^43^4^1			UNACCEPT			0.00	0.0		0.13	3.1	34.1		108				2.92	69.5	37.5	317.0	118.4		0.21	5.0	——		0.94	22.4		——	——	——	39		2.88	19.9	87.6					4.2
20231023	住院	Patient	女	9天	静脉血	红细胞、白细胞、血小板形态未见异常。	000056^50^3^1			Reflex			0.01	0.2		0.12	2.5	34.5		111				3.52	74.8	37.8	322.0	117.3		0.19	4.1	——		0.86	18.4		——	——	——	45	45	2.94	19.1	83.9					4.7
20231024	住院	Patient	女	10天	静脉血	红细胞、白细胞、血小板形态未见异常。				3R已完成			0.01	0.3		0.07	1.8	29.7		97				2.42	60.4	37.6	327.0	115.1		0.10	2.6	——		1.40	34.9		——	——	——	55	55	2.58	19.0	80.6					4.0
20231117	住院	Patient	男	8天	静脉血	红细胞、白细胞、血小板形态未见异常。	000037^112^4^1			ACCEPT			0.07	0.4		0.33	2.0	45.8		163				6.15	37.3	34.4	356.0	96.6		3.96	24.0	——		5.99	36.3		——	——	——	252		4.74	16.9	60.1					16.5
20231117	住院	Patient	女	12天	静脉血	红细胞形态未见异常,白细胞形态未见异常,光学计数PLT.	000338^42^2^1			Stain-Status Success			0.05	0.5		0.67	6.6	41.8		138				1.91	18.7	31.0	330.0	93.9		2.00	19.6	——		5.57	54.6		——	——	——	80	80	4.45	18.8	63.2					10.2
20231119	住院	Patient	男	7天	静脉血	红细胞、白细胞、血小板形态未见异常。				ACCEPT			0.03	0.4		0.59	7.8	52.1		173				2.11	28.1	34.0	332.0	102.4		1.19	15.8	——		3.59	47.9		——	——	——	191		5.09	16.5	63.0					7.5
20231120	住院	Patient	男	1月4天	末梢血	红细胞、白细胞、血小板形态未见异常。				ACCEPT			0.02	0.2		0.47	4.5	28.2		102				5.08	48.8	31.0	362.0	85.7		1.45	13.9	——		3.39	32.6		——	——	——	152		3.29	15.9	49.2					10.4
20231125	住院	Patient	男	6天	静脉血	红细胞、白细胞、血小板形态未见异常。	000096^89^4^1			Stain-Status Success			0.02	0.3		0.32	4.1	41.0		139				2.44	31.3	37.5	339.0	110.5		2.03	26.0	——		2.99	38.3		——	——	——	87	87	3.71	16.5	67.7					7.8
20231128	住院	Patient	男	13天	静脉血	红细胞、白细胞、血小板形态未见异常。				ACCEPT			0.03	0.2		0.38	2.2	33.8		112				4.12	23.8	34.5	331.0	104.0		1.11	6.4	——		11.66	67.4		——	——	——	166	166	3.25	22.9	83.7					17.3
20231128	住院	Patient	男	9天	静脉血	已手工分类白细胞,红细胞、血小板形态未见异常.白细胞分类绝对值请按照校正白细胞计算。				0.09			0.09	1.0		0.27	3.0	37.7		129				3.46	38.0	37.4	342.0	109.3		0.64	7.0	——		3.64	40.0		——	——	——	145	145	3.45	16.8	65.9					9.1
20231203	住院	Patient	男	18天	静脉血	红细胞、白细胞、血小板形态未见异常。	000047^98^2^1			ACCEPT			0.12	0.9		1.13	8.6	32.1		105				3.34	25.5	33.7	327.0	102.9		1.26	9.6	——		7.26	55.4		——	——	——	221		3.12	23.5	84.6					13.1
20231207	住院	Patient	男	18天	静脉血	红细胞、白细胞、血小板形态未见异常。	000064^93^2^1			Stain-Status Success			0.04	0.3		0.07	0.6	35.6		114				4.43	37.9	34.5	320.0	107.9		2.91	24.9	——		4.25	36.3		——	——	——	154	154	3.30	18.7	72.4					11.7
20231207	住院	Patient	女	2天	静脉血	红细胞、白细胞、血小板形态未见异常。				ACCEPT			0.02	0.2		0.05	0.4	37.2		126				2.61	21.2	28.1	339.0	83.0		0.92	7.5	——		8.70	70.7		——	——	——	137	137	4.48	18.7	49.8					12.3
20231210	住院	Patient	女	5天	静脉血	红细胞、白细胞、血小板形态未见异常。	000001^106^3^1			ACCEPT			0.04	0.4		0.53	5.5	36.3		114				3.25	33.9	27.1	314.0	86.2		1.00	10.4	——		4.78	49.8		——	——	——	157	157	4.21	18.0	55.3					9.6
20231210	住院	Patient	女	5天	静脉血	红细胞、白细胞、血小板形态未见异常。	000089^79^1^1			ACCEPT			0.03	0.4		0.15	1.8	44.9		147				3.58	41.6	26.6	327.0	81.2		1.31	15.2	——		3.53	41.0		——	——	——	341		5.53	19.0	52.7					8.6
20231211	住院	Patient	女	16天	静脉血	红细胞、白细胞、血小板形态未见异常。				UNACCEPT			0.02	0.3		0.05	0.8	44.3		139				0.74	12.2	33.1	314.0	105.5		0.52	8.5	——		4.77	78.2		——	——	——	111		4.20	16.2	63.1					6.1
20231212	住院	Patient	女	7天	静脉血	红细胞、白细胞、血小板形态未见异常。	000037^31^1^1			ACCEPT			0.02	0.2		0.96	10.7	36.0		114				3.69	41.0	27.4	317.0	86.5		0.94	10.4	——		3.39	37.7		——	——	——	179	179	4.16	17.0	52.6					9.0
20231212	住院	Patient	男	27天	静脉血	红细胞、白细胞、血小板形态未见异常。				ACCEPT			0.05	0.3		1.01	5.5	23.8		81				5.16	28.2	32.9	340.0	96.7		1.43	7.8	——		10.65	58.2		——	——	——	193	193	2.46	23.4	77.5					18.3
20231213	住院	Patient	女	5天	静脉血	红细胞、白细胞形态未见异常，镜下查见大血小板。	000003^45^6^1			ACCEPT			0.03	0.3		0.33	3.7	49.5		177				2.25	25.3	39.8	358.0	111.2		1.35	15.2	——		4.94	55.5		——	——	——	81	81	4.45	16.6	68.2					8.9
20231213	住院	Patient	男	12天	静脉血	红细胞、白细胞、血小板形态未见异常。				ACCEPT			0.03	0.4		0.07	0.9	39.5		139				1.90	23.2	28.6	352.0	81.3		1.50	18.3	——		4.69	57.2		——	——	——	92	92	4.86	30.8	82.8					8.2
20231214	住院	Patient	女	1天	静脉血	已手工分类白细胞,血小板形态未见异常.白细胞分类绝对值请按照校正白细胞计算。				15.2								44.0		153				5.09	19.0	39.9	348.0	114.9		2.41	9.0	——		19.30	72.0		——	——	——	139		3.83	27.4	109.3					26.8
20231214	住院	Patient	男	13天	静脉血	红细胞、白细胞、血小板形态未见异常。				ACCEPT			0.03	0.4		0.06	0.8	40.1		136				1.09	14.4	29.2	339.0	86.2		0.87	11.5	——		5.54	72.9		——	——	——	97	97	4.65	31.8	92.1					7.6
20231215	住院	Patient	女	2天	静脉血	已手工分类白细胞,红细胞形态未见异常.光学计数PLT.	000058^106^4^1			4.4						0.17	2.0	38.2		131				2.44	28.0	38.9	343.0	113.4		0.35	4.0	——		5.39	62.0		——	——	——	80	80	3.37	26.9	109.3					8.7
20231215	住院	Patient	女	20天	静脉血	红细胞、白细胞、血小板形态未见异常。				UNACCEPT			0.03	0.2		1.23	8.9	31.5		109				6.13	44.4	31.9	346.0	92.1		2.40	17.4	——		4.02	29.1		——	——	——	74	74	3.42	16.0	53.9					13.8
20231219	住院	Patient	女	6天	静脉血	已手工分类白细胞,红细胞、血小板形态未见异常.白细胞分类绝对值请按照校正白细胞计算。				3.0			0.08	1.0				33.4		121				2.84	36.0	37.9	362.0	104.7		1.03	13.0	——		3.48	44.0		——	——	——	107	107	3.19	25.2	92.9					7.9
20231221	住院	Patient	女	26天	静脉血	红细胞、白细胞、血小板形态未见异常。				ACCEPT			0.02	0.2		0.77	6.5	31.8		102				5.20	44.1	31.3	321.0	97.5		1.45	12.3	——		4.35	36.9		——	——	——	164	164	3.26	18.0	62.6					11.8
[truncated: 2 more columns]
