# Supplementary material for: MPV vs. Optical Platelet Volume Measurement: Which Is a Better Indicator for Neonatal Sepsis?
Source: Research Square preprint supplement (doi:10.21203/rs.3.rs-5332746/v1), 2024-12-16
Supplement: Supplementary file 2 [file a40404fbda264c92512565d9.xlsx]

## Sheet: 修饰后
检验日期	编号	病人姓名	性别	年龄	MPV	PLT-F
20230202	8217	Normal neonate	男	4天	8.7	42.8
20230227	8210	Normal neonate	男	7天	8.9	40.3
20230216	8221	Normal neonate	男	5天	8.9	40.5
20230217	8207	Normal neonate	女	1天	9	40.6
20230322	8315	Normal neonate	男	8天	9	42.3
20230301	8206	Normal neonate	男	0天	9.1	42.3
20230215	8201	Normal neonate	女	0天	9.2	42.4
20230215	8202	Normal neonate	女	0天	9.2	42.4
20230215	8204	Normal neonate	女	2天	9.2	42.4
20230215	8218	Normal neonate	男	1天	9.2	42.6
20230217	8208	Normal neonate	女	1天	9.2	42.7
20230222	8203	Normal neonate	男	0天	9.2	42.9
20230320	8203	Normal neonate	男	3天	9.2	43
20230329	8309	Normal neonate	男	1天	9.2	43.2
20230207	8210	Normal neonate	女	1天	9.3	43.4
20230322	8317	Normal neonate	女	1天	9.3	43.5
20230323	8315	Normal neonate	男	1天	9.3	43.6
20230228	8208	Normal neonate	女	12天	9.4	43.9
20230213	8208	Normal neonate	男	11天	9.5	43.9
20230216	8209	Normal neonate	男	1天	9.5	44
20230217	8204	Normal neonate	男	0天	9.5	44.2
20230217	8205	Normal neonate	女	1天	9.5	44.6
20230217	8209	Normal neonate	女	4天	9.5	44.6
20230330	8306	Normal neonate	女	3天	9.5	44.7
20230330	8314	Normal neonate	男	1天	9.5	44.7
20230330	8317	Normal neonate	女	2天	9.5	44.7
20230330	8324	Normal neonate	女	2天	9.5	44.9
20230228	8217	Normal neonate	男	1天	9.6	45
20230209	8209	Normal neonate	男	2天	9.6	45.1
20230213	8207	Normal neonate	男	1天	9.6	45.1
20230222	8208	Normal neonate	男	4天	9.6	45.2
20230323	8303	Normal neonate	男	0天	9.6	45.2
20230324	8307	Normal neonate	男	2天	9.6	45.2
20230324	8311	Normal neonate	女	3天	9.6	45.3
20230202	8214	Normal neonate	男	0天	9.7	45.3
20230227	8206	Normal neonate	男	0天	9.7	45.5
20230209	8212	Normal neonate	男	6天	9.7	45.6
20230215	8214	Normal neonate	女	1天	9.7	45.7
20230329	8307	Normal neonate	女	2天	9.7	45.8
20230330	8323	Normal neonate	女	1天	9.7	46
20230227	8212	Normal neonate	男	6天	9.8	46
20230302	8205	Normal neonate	女	4天	9.8	46.2
20230302	8311	Normal neonate	男	1天	9.8	46.3
20230213	8213	Normal neonate	女	5天	9.8	46.3
20230213	8215	Normal neonate	男	7天	9.8	46.3
20230215	8211	Normal neonate	男	1天	9.8	46.4
20230216	8210	Normal neonate	男	2天	9.8	47.1
20230220	8215	Normal neonate	男	2天	9.8	47.2
20230322	8318	Normal neonate	男	7天	9.8	47.4
20230330	8301	Normal neonate	女	5天	9.8	47.4
20230330	8316	Normal neonate	女	6天	9.8	47.4
20230330	8319	Normal neonate	女	1天	9.8	47.6
20230330	8321	Normal neonate	男	1天	9.8	47.8
20230202	8216	Normal neonate	男	14天	9.9	47.9
20230227	8213	Normal neonate	女	12天	9.9	48
20230227	8216	Normal neonate	女	6天	9.9	48
20230228	8214	Normal neonate	男	1天	9.9	48.3
20230301	8205	Normal neonate	女	5天	9.9	48.3
20230302	8209	Normal neonate	男	4天	9.9	48.4
20230216	8213	Normal neonate	男	1天	9.9	48.4
20230322	8303	Normal neonate	女	1天	9.9	48.5
20230329	8305	Normal neonate	女	1天	9.9	48.5
20230330	8302	Normal neonate	女	5天	9.9	48.5
20230330	8307	Normal neonate	男	0天	9.9	48.5
20230227	8208	Normal neonate	女	17天	10	48.5
20230208	8207	Normal neonate	男	0天	10	48.6
20230213	8203	Normal neonate	男	11天	10	48.7
20230216	8218	Normal neonate	男	1天	10	48.7
20230217	8203	Normal neonate	女	1天	10	48.8
20230220	8211	Normal neonate	男	13天	10	48.8
20230221	8204	Normal neonate	男	12天	10	48.9
20230222	8210	Normal neonate	女	5天	10	48.9
20230322	8308	Normal neonate	男	2天	10	49
20230324	8308	Normal neonate	男	10天	10	49
20230324	8312	Normal neonate	男	9天	10	49
20230329	8302	Normal neonate	男	1天	10	49
20230202	8219	Normal neonate	女	10天	10.1	49.1
20230227	8218	Normal neonate	男	11天	10.1	49.2
20230228	8219	Normal neonate	女	13天	10.1	49.3
20230301	8212	Normal neonate	男	2天	10.1	49.3
20230215	8205	Normal neonate	男	7天	10.1	49.4
20230220	8206	Normal neonate	男	11天	10.1	49.4
20230222	8213	Normal neonate	女	8天	10.1	49.4
20230320	8204	Normal neonate	男	4天	10.1	49.5
20230323	8318	Normal neonate	男	6天	10.1	49.6
20230324	8304	Normal neonate	女	3天	10.1	49.8
20230324	8305	Normal neonate	男	18天	10.1	49.9
20230330	8303	Normal neonate	男	1天	10.1	49.9
20230202	8209	Normal neonate	男	15天	10.2	50
20230301	8209	Normal neonate	女	6天	10.2	50
20230302	8201	Normal neonate	女	9天	10.2	50.1
20230207	8207	Normal neonate	男	9天	10.2	50.1
20230215	8216	Normal neonate	男	1天	10.2	50.1
20230216	8215	Normal neonate	男	2天	10.2	50.2
20230220	8202	Normal neonate	男	6天	10.2	50.2
20230221	8201	Normal neonate	女	29天	10.2	50.3
20230221	8202	Normal neonate	男	7天	10.2	50.4
20230322	8319	Normal neonate	男	23天	10.2	50.5
20230323	8307	Normal neonate	男	1天	10.2	50.5
20230323	8308	Normal neonate	男	3天	10.2	50.5
20230323	8310	Normal neonate	男	3天	10.2	50.6
20230329	8312	Normal neonate	女	1天	10.2	50.6
20230329	8313	Normal neonate	女	0天	10.2	50.7
20230228	8218	Normal neonate	男	1天	10.3	50.8
20230302	8204	Normal neonate	女	8天	10.3	50.8
20230302	8207	Normal neonate	女	13天	10.3	51
20230215	8203	Normal neonate	男	0天	10.3	51
20230216	8212	Normal neonate	男	1天	10.3	51.1
20230308	8205	Normal neonate	男	9天	10.3	51.2
20230322	8313	Normal neonate	男	5天	10.3	51.2
20230322	8316	Normal neonate	男	6天	10.3	51.2
20230330	8313	Normal neonate	女	0天	10.3	51.3
20230330	8320	Normal neonate	女	0天	10.3	51.3
20230202	8210	Normal neonate	男	2天	10.4	51.3
20230202	8220	Normal neonate	男	5天	10.4	51.4
20230301	8201	Normal neonate	女	5天	10.4	51.4
20230302	8203	Normal neonate	男	20天	10.4	51.5
20230208	8206	Normal neonate	女	7天	10.4	51.5
20230209	8203	Normal neonate	男	14天	10.4	51.6
20230209	8207	Normal neonate	男	7天	10.4	51.6
20230213	8214	Normal neonate	女	7天	10.4	51.6
20230215	8208	Normal neonate	女	21天	10.4	51.7
20230220	8208	Normal neonate	女	1天	10.4	51.7
20230221	8219	Normal neonate	女	3天	10.4	51.8
20230222	8207	Normal neonate	男	8天	10.4	51.8
20230222	8209	Normal neonate	女	7天	10.4	51.8
20230222	8212	Normal neonate	男	3天	10.4	51.9
20230306	8201	Normal neonate	女	11天	10.4	51.9
20230306	8210	Normal neonate	女	3天	10.4	52.1
20230329	8311	Normal neonate	女	4天	10.4	52.1
20230330	8308	Normal neonate	男	25天	10.4	52.2
20230330	8315	Normal neonate	女	1天	10.4	52.2
20230330	8318	Normal neonate	男	9天	10.4	52.2
20230228	8207	Normal neonate	男	15天	10.5	52.2
20230302	8312	Normal neonate	男	21天	10.5	52.2
20230207	8206	Normal neonate	女	6天	10.5	52.3
20230209	8206	Normal neonate	男	8天	10.5	52.3
20230213	8209	Normal neonate	男	11天	10.5	52.4
20230213	8212	Normal neonate	女	7天	10.5	52.5
20230215	8210	Normal neonate	男	9天	10.5	52.5
20230216	8211	Normal neonate	男	10天	10.5	52.6
20230324	8303	Normal neonate	女	8天	10.5	52.6
20230330	8312	Normal neonate	男	3天	10.5	52.6
20230227	8207	Normal neonate	男	12天	10.6	52.7
20230209	8202	Normal neonate	女	5天	10.6	52.7
20230216	8206	Normal neonate	女	9天	10.6	52.7
20230221	8214	Normal neonate	男	3天	10.6	52.7
20230222	8215	Normal neonate	男	26天	10.6	52.7
20230306	8205	Normal neonate	女	3天	10.6	52.7
20230308	8203	Normal neonate	女	19天	10.6	52.8
20230323	8312	Normal neonate	女	1天	10.6	52.8
20230329	8301	Normal neonate	男	4天	10.6	52.9
20230202	8212	Normal neonate	男	9天	10.7	52.9
20230227	8205	Normal neonate	男	12天	10.7	53
20230227	8219	Normal neonate	男	1天	10.7	53
20230228	8203	Normal neonate	女	14天	10.7	53
20230228	8213	Normal neonate	男	14天	10.7	53
20230215	8215	Normal neonate	女	5天	10.7	53.1
20230320	8209	Normal neonate	男	13天	10.7	53.1
20230323	8306	Normal neonate	男	6天	10.7	53.2
20230323	8309	Normal neonate	男	6天	10.7	53.2
20230324	8302	Normal neonate	男	4天	10.7	53.2
20230324	8310	Normal neonate	男	7天	10.7	53.4
20230330	8311	Normal neonate	男	23天	10.7	53.4
20230202	8213	Normal neonate	女	4天	10.8	53.5
20230227	8217	Normal neonate	男	6天	10.8	53.6
20230228	8209	Normal neonate	女	5天	10.8	53.6
20230209	8204	Normal neonate	女	6天	10.8	53.6
20230220	8207	Normal neonate	女	4天	10.8	53.8
20230222	8206	Normal neonate	男	26天	10.8	53.9
20230306	8204	Normal neonate	女	24天	10.8	53.9
20230308	8202	Normal neonate	男	23天	10.8	54.1
20230320	8207	Normal neonate	男	6天	10.8	54.1
20230323	8314	Normal neonate	男	14天	10.8	54.1
20230329	8304	Normal neonate	男	1天	10.8	54.1
20230202	8215	Normal neonate	女	5天	10.9	54.2
20230227	8204	Normal neonate	男	4天	10.9	54.4
20230228	8206	Normal neonate	女	15天	10.9	54.4
20230301	8202	Normal neonate	女	13天	10.9	54.5
20230301	8204	Normal neonate	女	13天	10.9	54.5
20230301	8207	Normal neonate	男	4岁	10.9	54.5
20230301	8208	Normal neonate	男	6天	10.9	54.6
20230208	8204	Normal neonate	男	7天	10.9	54.6
20230215	8206	Normal neonate	男	8天	10.9	54.7
20230220	8201	Normal neonate	男	7天	10.9	54.7
20230221	8211	Normal neonate	男	6天	10.9	54.8
20230320	8208	Normal neonate	女	6天	10.9	54.8
20230322	8301	Normal neonate	男	16天	10.9	54.8
20230323	8304	Normal neonate	女	3天	10.9	54.8
20230323	8305	Normal neonate	女	8天	10.9	54.9
20230323	8317	Normal neonate	女	7天	10.9	54.9
20230329	8308	Normal neonate	男	4天	10.9	55
20230330	8304	Normal neonate	男	24天	10.9	55.1
20230330	8325	Normal neonate	男	11天	10.9	55.2
20230208	8205	Normal neonate	男	15天	11	55.2
20230216	8219	Normal neonate	男	1天	11	55.2
20230202	8207	Normal neonate	女	17天	11.1	55.3
20230302	8210	Normal neonate	女	1天	11.1	55.3
20230302	8313	Normal neonate	女	12天	11.1	55.4
20230209	8205	Normal neonate	女	8天	11.1	55.4
20230213	8211	Normal neonate	女	7天	11.1	55.5
20230217	8212	Normal neonate	男	7天	11.1	55.6
20230220	8203	Normal neonate	男	25天	11.1	55.7
20230220	8209	Normal neonate	男	4天	11.1	55.8
20230221	8203	Normal neonate	男	11天	11.1	55.8
20230221	8212	Normal neonate	女	10天	11.1	56.1
20230320	8206	Normal neonate	男	13天	11.1	56.3
20230322	8304	Normal neonate	男	2天	11.1	56.3
20230207	8203	Normal neonate	女	13天	11.2	56.4
20230215	8207	Normal neonate	男	7天	11.2	56.4
20230323	8301	Normal neonate	男	12天	11.2	56.4
20230329	8310	Normal neonate	女	6天	11.2	56.4
20230228	8220	Normal neonate	男	13天	11.3	56.5
20230301	8203	Normal neonate	女	13天	11.3	56.6
20230213	8210	Normal neonate	女	13天	11.3	56.6
20230216	8203	Normal neonate	女	10天	11.3	56.7
20230217	8206	Normal neonate	女	7天	11.3	56.8
20230220	8213	Normal neonate	男	13天	11.3	56.8
20230221	8220	Normal neonate	女	11天	11.3	56.9
20230222	8202	Normal neonate	男	18天	11.3	56.9
20230222	8204	Normal neonate	男	7天	11.3	56.9
20230222	8214	Normal neonate	男	7天	11.3	56.9
20230306	8202	Normal neonate	男	8天	11.3	57
20230322	8314	Normal neonate	女	9天	11.3	57
20230227	8201	Normal neonate	男	10天	11.4	57
20230228	8205	Normal neonate	男	20天	11.4	57.2
20230209	8210	Normal neonate	女	9天	11.4	57.3
20230221	8210	Normal neonate	女	14天	11.4	57.3
20230221	8215	Normal neonate	女	15天	11.4	57.3
20230306	8207	Normal neonate	男	5天	11.4	57.5
20230322	8307	Normal neonate	女	7天	11.4	57.8
20230330	8310	Normal neonate	女	27天	11.4	57.9
20230213	8201	Normal neonate	男	17天	11.5	58
20230213	8206	Normal neonate	男	13天	11.5	58
20230216	8202	Normal neonate	男	6天	11.5	58
20230216	8208	Normal neonate	男	20天	11.5	58.1
20230217	8202	Normal neonate	男	6天	11.5	58.1
20230221	8205	Normal neonate	女	8天	11.5	58.1
20230221	8216	Normal neonate	男	4天	11.5	58.2
20230306	8203	Normal neonate	女	7天	11.5	58.2
20230330	8322	Normal neonate	男	2天	11.5	58.3
20230228	8216	Normal neonate	女	11天	11.6	58.4
20230208	8202	Normal neonate	女	19天	11.6	58.4
20230220	8204	Normal neonate	男	13天	11.6	58.5
20230221	8207	Normal neonate	女	13天	11.6	58.5
20230221	8213	Normal neonate	男	24天	11.6	58.8
20230222	8201	Normal neonate	男	0天	11.6	58.8
20230320	8201	Normal neonate	男	2天	11.6	58.8
20230323	8302	Normal neonate	男	18天	11.6	58.8
20230202	8206	Normal neonate	男	8天	11.7	58.8
20230228	8210	Normal neonate	女	24天	11.7	58.9
20230207	8204	Normal neonate	男	14天	11.7	59
20230213	8205	Normal neonate	女	6天	11.7	59.1
20230323	8319	Normal neonate	男	14天	11.7	59.1
20230329	8306	Normal neonate	男	6天	11.7	59.1
20230301	8214	Normal neonate	女	23天	11.8	59.3
20230322	8311	Normal neonate	女	12天	11.8	59.5
20230207	8202	Normal neonate	男	6天	11.9	59.5
20230207	8208	Normal neonate	男	6天	11.9	59.6
20230207	8209	Normal neonate	男	10天	11.9	59.6
20230220	8210	Normal neonate	男	18天	11.9	59.6
20230308	8204	Normal neonate	女	6天	11.9	59.8
20230322	8306	Normal neonate	女	12天	11.9	59.9
20230202	8208	Normal neonate	女	13天	12	59.9
20230301	8211	Normal neonate	女	25天	12	60.1
20230302	8314	Normal neonate	女	26天	12	60.1
20230215	8209	Normal neonate	女	11天	12	60.2
20230220	8214	Normal neonate	男	5天	12	60.2
20230323	8313	Normal neonate	男	13天	12	60.4
20230301	8213	Normal neonate	男	0天	12.1	60.5
20230207	8205	Normal neonate	女	6天	12.1	60.5
20230213	8204	Normal neonate	男	22天	12.1	60.5
20230220	8205	Normal neonate	女	11天	12.2	60.8
20230302	8202	Normal neonate	男	8天	12.3	61.2
20230209	8211	Normal neonate	男	7天	12.3	61.2
20230222	8211	Normal neonate	女	16天	12.3	61.3
20230322	8312	Normal neonate	男	7天	12.3	61.6
20230324	8309	Normal neonate	女	18天	12.3	61.9
20230209	8201	Normal neonate	男	15天	12.4	61.9
20230215	8217	Normal neonate	女	12天	12.4	62.1
20230216	8205	Normal neonate	男	12天	12.4	62.2
20230221	8208	Normal neonate	男	1天	12.4	62.3
20230306	8208	Normal neonate	男	12天	12.4	62.6
20230324	8301	Normal neonate	女	7天	12.4	62.9
20230228	8202	Normal neonate	男	14天	12.5	62.9
20230301	8210	Normal neonate	女	25天	12.5	62.9
20230221	8209	Normal neonate	男	28天	12.5	63.1
20230322	8305	Normal neonate	女	16天	12.5	63.2
20230217	8213	Normal neonate	男	10天	12.6	64
20230322	8309	Normal neonate	男	11天	12.6	64.3
20230215	8213	Normal neonate	女	18天	12.8	64.8
20230209	8208	Normal neonate	女	14天	12.9	64.8
20230322	8302	Normal neonate	男	12天	12.9	65.1
20230322	8310	Normal neonate	男	11天	12.9	65.6
20230202	8205	Normal neonate	男	7天	13	66.7
20230216	8220	Normal neonate	男	14天	13	67.7
20230306	8209	Normal neonate	男	20天	13	71.8
