# Supplementary material for: MPV vs. Optical Platelet Volume Measurement: Which Is a Better Indicator for Neonatal Sepsis?
Source: Research Square preprint supplement (doi:10.21203/rs.3.rs-5332746/v1), 2024-12-16
Supplement: Supplementary file 3 [file e3d19de8f1c8a0ff793fceea.xlsx]

## Sheet: Sheet1
1	20231025	9823
2	20231102	9802
3	20231102	9804
4	20231103	9805
5	20231106	9809
6	20231106	9812
7	20231108	9808
8	20231110	9811
9	20231114	9806
10	20231117	9807
11	20231102	9803
12	20231108	9803
13	20231110	9818
14	20231114	9804
15	20231115	9806
16	20231117	9806
17	20231121	9804
18	20231124	9811
19	20231124	9817
20	20231128	9801
21	20231128	9809
22	20240103	9801
23	20240103	9809
24	20240112	9802
25	20240112	9803
26	20240112	9804
27	20240112	9809
28	20240117	9804
29	20240117	9806
30	20231128	9814
31	20231205	9802
32	20231205	9803
33	20231205	9805
34	20231208	9801
35	20231212	9805
36	20231219	9803
37	20231219	9804
38	20231221	9805
39	20240103	9804
40	20240103	9812
41	20231106	9803
42	20231115	9803
43	20231121	9801
44	20231124	9813
45	20240112	9808
46	20240112	9817
47	20240117	9803
48	20240117	9808
49	20240103	9805
50	20240103	9808
51	20240103	9811
52	20240112	9801
53	20240112	9807
54	20240112	9816
55	20240112	9818
56	20240117	9809
57	20240127	9801
58	20240127	9805
59	20240127	9810
60	20240112	9805
61	20240112	9811
62	20240112	9812
63	20240112	9815
64	20240117	9801
65	20240117	9807
66	20240127	9812
67	20240127	9813
68	20240127	9814
69	20231106	9801
70	20231110	9815
71	20231115	9808
72	20231117	9808
73	20231124	9812
74	20231208	9802

## Sheet: 李彦霖之婴
检验日期	编号	姓名	性别	年龄	MPV	CRP	PLT F Y	PLT
20231102	9803	Paitent 1	女	18天	10.8	0.6	40.8	197
20231108	9803	Paitent 1	女	20天	13.5	27.4	68.5	134
20231110	9818	Paitent 1	女	21天	-----	114.8	84.9	44
20231114	9804	Paitent 1	女	24天	13.6	36.5	70.3	88
20231115	9806	Paitent 1	女	25天	13.8	43.9	72.8	100
20231117	9806	Paitent 1	女	27天	13	11.1	67.1	152
20231121	9804	Paitent 1	女	1月	13.1	11.5	67.9
20231124	9811	Paitent 1	女	1月6天	11.6	17.8	52.4	142
20231124	9817	Paitent 1	女	1月6天	10.6	6.9	45.7	133
20231128	9801	Paitent 1	女	1月13天	11.5	11	49.2	164
20231128	9809	Paitent 1	女	1月14天	11.1	3.2	48.3	155
日期	标本号	姓名	HCT	HGB	IPF	MACROR	MCH	MCHC	MCV	MICROR	MPV	NRBC#	NRBC%	P LCR	PCT	PDW	PLT	PLT F	PLT F Y	PLT F Z	PLT I	RBC	RDW CV	RDW SD	TNC N	WBC	WBC N	"ABN LYMPHO?"	"ATYPICAL LYMPHO?"	"BLASTS/ABN LYMPHO?"	"BLASTS?"	"FRAGMENTS?"	"HGB DEFECT?"	"IRON DEFICIENCY?"	"LEFT SHIFT?"	"PLT CLUMPS?"	"RBC AGGLUTINATION?"	"TURB/HGBINTERFERENCE?"
2023/11/2 00:00:00	9803		27.4	81	4.9	43.9	36.7	296	124	1.6	10.8	0.02	0.4	29	0.22	10.6	197	197	40.8	34.6	202	2.21	18.2	82	4.9	4.84	4.84	1	1	1	1	20	60	60	1	10	70	80
2023/11/8 00:00:00	9803		32.3	103	5.4	16.3	32.7	319	102.5	2.6	13.5	0.01	0.5	26.8	0.13	10.9	134	134	68.5	36.6	131	3.15	20.5	77	2	1.98	1.98	1	1	1	1	40	70	70	1	10	70	80
2023/11/10 00:00:00	9818		34.9	120	7	7.2	31.3	344	90.9	2.9	-----	0.04	0.7	-----	-----	-----	44	44	84.9	37.1	68	3.84	19.1	59.8	5.4	5.35	5.35	1	1	1	1	20	70	80	1	0	70	90
2023/11/14 00:00:00	9804		31.5	101	5.2	9.5	31.4	321	97.8	1.9	13.6	0.03	0.5	34.1	0.09	12.9	88	88	70.3	35.4	84	3.22	17.8	62.8	5.8	5.77	5.77	1	1	1	1	20	70	70	1	80	70	80
2023/11/15 00:00:00	9806		29	98	5.2	5.4	31.5	338	93.2	2.4	13.8	0.02	0.3	40.1	0.14	15.7	100	100	72.8	34.8	116	3.11	16.6	55	7.5	7.47	7.47	1	1	1	1	20	80	80	1	40	70	90
2023/11/17 00:00:00	9806		27.2	90	4.1	5.9	31.3	331	94.4	2	13	0.01	0.2	30	0.17	10.5	152	152	67.1	35.9	156	2.88	16.8	57.6	4.71	4.7	4.7	1	1	1	1	20	70	70	1	0	70	90
	9804										13.1								67.9
2023/11/24 00:00:00	9811		33.2	112	4.7	4.5	30.8	337	91.2	2.6	11.6	0	0	33.7	0.19	12.6	142	142	52.4	38.4	160	3.64	15.8	51.6	9.7	9.7	9.7	1	1	1	1	20	80	80	1	10	70	90
2023/11/24 00:00:00	9817		21	70	4.6	5.2	30.8	333	92.5	2.9	10.6	0.01	0.1	38.2	0.19	13.2	133	133	45.7	34.4	160	2.27	17.3	56.5	8.48	8.47	8.47	1	1	1	1	40	80	80	1	30	70	90
2023/11/28 00:00:00	9801		29.7	96	3.2	5.5	30.3	323	93.7	2.2	11.5	0.05	0.9	34.1	0.19	12.6	164	164	49.2	34.4	161	3.17	16	54.2	5.66	5.61	5.61	1	1	1	1	10	80	80	1	0	70	80
2023/11/28 00:00:00	9809		26.4	87	4.2	4.8	30.4	330	92.3	2.6	11.1	0	0	28.7	0.17	10.4	155	155	48.3	37.4	161	2.86	16.1	52.6	6.14	6.14	6.14	1	1	1	1	20	80	80	1	10	70	90

## Sheet: 徐春梅之婴
检验日期	编号	姓名	性别	年龄	MPV	CRP	PLT F Y	PLT
20231128	9814	Paitent 2	男	19天	13.9	39.6	78.9	298
20231205	9802	Paitent 2	男	22天	12	13.9	63.2	456
20231205	9803	Paitent 2	男	23天	11.4	7.4	52.3	410
20231205	9805	Paitent 2	男	25天	12.8	14	68	352
20231208	9801	Paitent 2	男	27天	13.7	37.4	73.2	339
20231212	9805	Paitent 2	男	28天	11.7	7.5	52.6	423
20231219	9803	Paitent 2	男	1月8天	12.3	36	70.8	421
20231219	9804	Paitent 2	男	1月10天	14.5	109.5	85.9	554
20231221	9805	Paitent 2	男	1月11天	14.3	89.5	83.3	486
20240103	9804	Paitent 2	男	1月23天	13.2	30.8	72.6	306
20240103	9812	Paitent 2	男	1月24天	13.5	58.4	77.4	288
日期	标本号	姓名	HCT	HGB	IPF	MACROR	MCH	MCHC	MCV	MICROR	MPV	NRBC#	NRBC%	P LCR	PCT	PDW	PLT	PLT F	PLT F Y	PLT F Z	PLT I	RBC	RDW CV	RDW SD	TNC N	WBC	WBC N	"ABN LYMPHO?"	"ATYPICAL LYMPHO?"	"BLASTS/ABN LYMPHO?"	"BLASTS?"	"FRAGMENTS?"	"HGB DEFECT?"	"IRON DEFICIENCY?"	"LEFT SHIFT?"	"PLT CLUMPS?"	"RBC AGGLUTINATION?"	"TURB/HGBINTERFERENCE?"
2023/11/28 00:00:00	9814		27.9	90	9.1	5.8	31.3	323	96.9	2.1	13.9	0.03	0.3	36.9	0.35	13.7	298	298	78.9	41.5	301	2.88	16.2	57.1	9.46	9.43	9.43	1	1	1	1	30	70	70	1	20	70	80
2023/12/5 00:00:00	9802		30.4	99	8.7	5.8	31.1	326	95.6	2.9	12	0.03	0.2	40.4	0.55	15.1	456	456	63.2	36.4	457	3.18	16.2	57.1	13.33	13.3	13.3	1	1	1	1	30	70	70	1	1	70	80
2023/12/5 00:00:00	9803		29.1	89	9.5	9.8	31	306	101.4	2.2	11.4	0.03	0.2	42.6	0.54	15.4	410	410	52.3	35.1	436	2.87	16.9	61.4	12.31	12.28	12.28	1	1	1	1	30	70	70	1	1	70	80
2023/12/5 00:00:00	9805		23.2	76	9.2	4.5	31.4	328	95.9	2.7	12.8	0.01	0.1	38.2	0.43	14.3	352	352	68	38	369	2.42	15.8	54.7	13.97	13.96	13.96	1	1	1	1	30	70	70	1	20	70	80
2023/12/8 00:00:00	9801		42.2	121	11.5	18.8	30.9	287	107.9	1	13.7	0	0	38.3	0.42	14.1	339	339	73.2	40.9	352	3.91	16.1	65.1	12.73	12.73	12.73	1	1	1	1	20	60	60	1	60	70	70
2023/12/12 00:00:00	9805		36.8	108	7.8	12.8	30.9	293	105.1	1.3	11.7	0	0	36.8	0.51	13.6	423	423	52.6	39.1	433	3.5	15.2	58.7	10.79	10.79	10.79	1	1	1	1	20	70	70	1	1	70	80
2023/12/19 00:00:00	9803		29.5	82	5.6	23.5	30.6	278	110.1	1.6	12.3	0.01	0.2	25.9	0.42	10.9	421	421	70.8	38.9	408	2.68	17.2	69.9	6.56	6.55	6.55	1	1	1	1	10	60	60	1	1	60	70
2023/12/19 00:00:00	9804		25.4	80	4.5	3.4	29.2	315	92.7	4.4	14.5	0.06	0.6	36.1	0.68	13.6	554	554	85.9	41.6	594	2.74	16.5	54.8	9.72	9.66	9.66	1	1	1	1	30	80	80	1	1	70	80
2023/12/21 00:00:00	9805		24.3	74	4.7	6.7	30	305	98.4	3.5	14.3	0.13	1.9	34.2	0.58	13.5	486	486	83.3	37.1	507	2.47	17	61.1	7.04	6.91	6.91	1	1	1	1	20	70	70	1	1	70	80
2024/1/3 00:00:00	9804		33.2	92	6.7	16.1	29.3	277	105.7	2.1	13.2	0.1	0.5	36	0.38	13.6	306	306	72.6	34.1	321	3.14	17.2	66.3	21.72	21.62	21.62	1	1	1	1	20	70	70	1	80	60	70
2024/1/3 00:00:00	9812		32.2	98	5.7	4.9	28.6	304	93.9	3.5	13.5	0.08	0.5	40.1	0.35	14.7	288	288	77.4	38.1	290	3.43	16.7	56.6	15.31	15.23	15.23	1	1	1	1	20	70	70	1	10	70	80

## Sheet: 肖惹夫之婴
检验日期	编号	姓名	性别	年龄	MPV	CRP	PLT F Y	PLT
20240112	9805	Patient 3	男	6天	未测出	136.5	81.4	101
20240112	9811	Patient 3	男	8天	13	66	67.3	108
20240112	9812	Patient 3	男	5天	未测出	100.7	82.2	87
20240112	9815	Patient 3	男	7天	12.9	74.2	65.1	96
20240117	9801	Patient 3	男	10天	未测出	16.1	47.1
20240117	9807	Patient 3	男	12天	13.6	19.9	71.5
20240127	9812	Patient 3	男	19天	未测出	7.5	61.4	172
20240127	9813	Patient 3	男	21天	未测出	5.4	60.7	235
20240127	9814	Patient 3	男	23天	未测出	1.9	56.3	159
日期	标本号	姓名	HCT	HGB	IPF	MACROR	MCH	MCHC	MCV	MICROR	MPV	NRBC#	NRBC%	P LCR	PCT	PDW	PLT	PLT F	PLT F Y	PLT F Z	PLT I	RBC	RDW CV	RDW SD	TNC N	WBC	WBC N	"ABN LYMPHO?"	"ATYPICAL LYMPHO?"	"BLASTS/ABN LYMPHO?"	"BLASTS?"	"FRAGMENTS?"	"HGB DEFECT?"	"IRON DEFICIENCY?"	"LEFT SHIFT?"	"PLT CLUMPS?"	"RBC AGGLUTINATION?"	"TURB/HGBINTERFERENCE?"
2024/1/12 00:00:00	9805		37.8	124	7.8	30.3	37.1	328	113.2	1.8	未测出	0.13	2.1	-----	-----	-----	101	101	81.4	36.4	115	3.34	19	79.9	6.35	6.22	6.22	1	1	1	1	40	60	60	1	50	80	80
2024/1/12 00:00:00	9811		51.1	174	7.9	15.7	34.3	341	100.6	2.8	13	0.23	3	40.8	0.14	18.1	108	108	67.3	35.8	116	5.08	22	80.7	7.83	7.6	7.6	1	1	1	1	20	60	70	1	40	60	90
2024/1/12 00:00:00	9812		42.4	137	8.5	35.7	38.1	323	117.8	1.4	未测出	0.05	3.2	-----	-----	-----	87	87	82.2	36	105	3.6	18.4	80.4	1.63	1.58	1.58	1	1	1	1	40	60	60	1	60	80	80
2024/1/12 00:00:00	9815		47.9	151	9.8	23.2	33.9	315	107.4	1.8	12.9	0.15	3.7	42.6	0.14	16.9	96	96	65.1	35.7	109	4.46	22.5	87.8	4.19	4.04	4.04	1	1	1	1	20	60	60	1	70	70	80
20240117	9801										未测出							125	47.1
20240117	9807										13.6							138	71.5
2024/1/27 00:00:00	9812		26.3	87	21.6	13.3	33	331	99.6	3.7	未测出	0.46	5.3	-----	-----	-----	172	172	61.4	39.3	176	2.64	21.7	75.3	9.09	8.63	8.63	1	1	1	1	80	60	70	1	164	80	90
2024/1/27 00:00:00	9813		26	84	14.8	20.1	34.1	323	105.7	3.6	未测出	0.96	6.1	-----	-----	-----	235	235	60.7	40.1	236	2.46	23.7	87.6	16.61	15.65	15.65	1	1	1	1	80	60	70	1	194	80	80
2024/1/27 00:00:00	9814		33	108	19.6	9.1	31.1	327	95.1	4.3	未测出	0.67	2.9	-----	-----	-----	159	159	56.3	40.1	160	3.47	20.1	67.7	24.17	23.5	23.5	1	1	1	1	40	70	70	1	124	70	80

## Sheet: 杜宛儒之婴
检验日期	编号	姓名	性别	年龄	MPV	CRP	PLT F Y	PLT	MPV
20240103	9801	Patient 4	男	1天	12	13.6	57.2	219	12
20240103	9809	Patient 4	男	2天	10.7	10	56.4	197	10.7
20240112	9802	Patient 4	男	3天	12.8	49.8	66.2	103	12.8
20240112	9803	Patient 4	男	5天	13.5	98.9	75	116	12.5
20240112	9804	Patient 4	男	10天	12.9	28.8	65.6	85	11.2
20240112	9809	Patient 4	男	11天	12.1	10.7	59	58	12.9
20240117	9804	Patient 4	男	15天	11.9	4.7	54.5
20240117	9806	Patient 4	男	18天	11.8	2.9	52.1
日期	标本号	姓名	HCT	HGB	IPF	MACROR	MCH	MCHC	MCV	MICROR	MPV	NRBC#	NRBC%	P LCR	PCT	PDW	PLT	PLT F	PLT F Y	PLT F Z	PLT I	RBC	RDW CV	RDW SD	TNC N	WBC	WBC N	"ABN LYMPHO?"	"ATYPICAL LYMPHO?"	"BLASTS/ABN LYMPHO?"	"BLASTS?"	"FRAGMENTS?"	"HGB DEFECT?"	"IRON DEFICIENCY?"	"LEFT SHIFT?"	"PLT CLUMPS?"	"RBC AGGLUTINATION?"	"TURB/HGBINTERFERENCE?"
2024/1/3 00:00:00	9801		32.6	103	3.4	4.7	29.6	316	93.7	2.3	12	0	0	40.1	0.29	14.9	219	219	57.2	35.3	242	3.48	15.9	55	5.57	5.57	5.57	1	1	1	1	20	80	80	1	10	70	80
2024/1/3 00:00:00	9809		29.1	97	4.9	3.1	29.8	333	89.3	3.2	10.7	0	0	31.8	0.22	13.3	197	197	56.4	38	209	3.26	15.6	51.5	4.17	4.17	4.17	1	1	1	1	20	80	80	1	30	70	90
2024/1/12 00:00:00	9802		23.9	76	6.5	4.3	29.5	318	92.6	2.5	12.8	0	0	45.7	0.13	18.1	103	103	66.2	33	102	2.58	16.2	54.3	12.5	12.5	12.5	1	1	1	1	20	80	80	1	104	70	80
2024/1/12 00:00:00	9803		35.1	105	5.7	10	29.9	299	100	1.7	13.5	0.02	0.1	45.7	0.15	16.6	116	116	75	32.1	117	3.51	17.2	62.1	19.7	19.68	19.68	1	1	1	1	20	70	70	1	134	70	80
2024/1/12 00:00:00	9804		37.4	124	5.9	4.1	30.2	332	91.2	1.9	12.9	0.21	3.1	36.2	0.1	17.9	85	85	65.6	33.4	88	4.1	14.6	49.1	6.93	6.72	6.72	1	1	1	1	0	80	80	1	40	70	90
2024/1/12 00:00:00	9809		32.8	108	6.9	3.6	30	329	91.1	2.4	12.1	0.01	0.1	44.6	0.09	23	58	58	59	34.4	67	3.6	15.2	50.6	7.84	7.83	7.83	1	1	1	1	0	80	80	1	60	70	90
	9804										11.9							131	54.5
	9806										11.8							125	52.1

## Sheet: 出院后门诊量统计
姓名	最终PLT-F-Y	门诊量
邓娜之大婴	63.2	6	康复
李彦霖之婴	48.3	4	康复
徐春梅之婴	77.4		2024.6去世
沈呈笑之婴	50.7	3	康复
肖惹夫之婴	56.3	2	康复
杜宛儒之婴	52.1	2	康复
涂旭苓之婴	42.8	3	康复
黄瑶之大婴	78.4	8	高危儿随访
